# Supplementary material for: Construction of 2-pyridones via oxidative cyclization of enamides: access to Pechmann dye derivatives
Source: Royal Society of Chemistry journal article supplement (doi:10.1039/d0ob02376k), 2021-01-01

## Supporting Information

### Construction of 2-Pyridones via Oxidative Cyclization of Enamides: Access to Pechmann Dye Derivatives

Sivanna Chithanna<sup>a</sup> and Ding-Yah Yang<sup>a,b,\*</sup>

<sup>a</sup>Department of Chemistry, Tunghai University

<sup>b</sup>Graduate Program for Biomedical and Materials Science, Tunghai University  
No. 1727, Sec. 4, Taiwan Boulevard, Xitun District, Taichung 407224, Taiwan

\*Corresponding author; Tel: 886-4-2359-7613; Fax: 886-4-2359-0426;

Email: [yang@thu.edu.tw](mailto:yang@thu.edu.tw)

## Table of Contents

|                                                                                                          |         |
|----------------------------------------------------------------------------------------------------------|---------|
| Instrumentation.....                                                                                     | S3      |
| X-ray crystallographic data of compound <b>6a</b> , <b>6b</b> , <b>6j</b> , <b>8b</b> and <b>11</b> .... | S4-S13  |
| General procedure A & spectral data of compound <b>4a</b> .....                                          | S14     |
| General procedure B & spectral data of compounds <b>6a–m</b> .....                                       | S14-S21 |
| General procedure C & spectral data of compounds <b>8a–d</b> .....                                       | S21-S23 |
| General procedure D & spectral data of compounds <b>10a–d</b> .....                                      | S23-S24 |
| Procedure & spectral data of compound <b>11</b> .....                                                    | S24-25  |
| Procedure & spectral data of compound <b>12</b> .....                                                    | S25     |
| General procedure E & spectral data of compounds <b>19a–b</b> .....                                      | S25-S26 |
| <sup>1</sup> H & <sup>13</sup> C NMR spectra for synthesized compounds.....                              | S27-S79 |

**Instrumentation:** Melting points were determined on a Mel-Temp melting point apparatus in open capillaries and are uncorrected. Infrared (IR) spectra were recorded using 1725XFT-IR spectrophotometer. High resolution mass spectra (HRMS) were obtained on a Thermo Fisher Scientific Finnigan MAT95XL spectrometer using magnetic sector analyzer.  $^1\text{H}$  NMR (400 MHz) and  $^{13}\text{C}$  NMR (100) spectra were recorded on a Bruker 400 spectrometer. Chemical shifts were reported in parts per million on the scale relative to an internal standard (tetramethylsilane, or appropriate solvent peaks) with coupling constants given in hertz.  $^1\text{H}$  NMR multiplicity data are denoted by s (singlet), d (doublet), t (triplet), q (quartet), m (multiplet). The photochemical reaction was carried out in a Rayonet photoreactor with 352 nm UV lamps. Analytical thin-layer chromatography (TLC) was carried out on Merck silica gel 60G-254 plates (25 mm) and developed with the solvents mentioned. Visualization was accomplished by using portable UV light, ninhydrin spray, or iodine chamber. Flash chromatography was performed in columns of various diameters with Merck silica gel (230–400 mesh ASTM 9385 kieselgel 60H) by elution with the solvent systems. Solvents, unless otherwise specified, were reagent grade and distilled once prior to use. All new compounds exhibited satisfactory spectroscopic and analytical data.

X-ray crystallographic data of compound **6a** (CCDC-1900621)

Single crystal of **6a** was obtained by slow evaporation from a mixture of dichloromethane and *n*-hexane at 25 °C. Single-crystal X-ray data were collected at 150 K on a Bruker APEX-II CCD diffractometer using graphite-monochromated Mo KR radiation ( $\lambda = 0.71073 \text{ \AA}$ ). The crystal structures were solved by using SHELXS-97 and the structures were refined using SHELXL-97 2014. All non-hydrogen atoms were refined anisotropically. Hydrogen atoms were fixed at geometrically calculated positions and were refined using riding model.

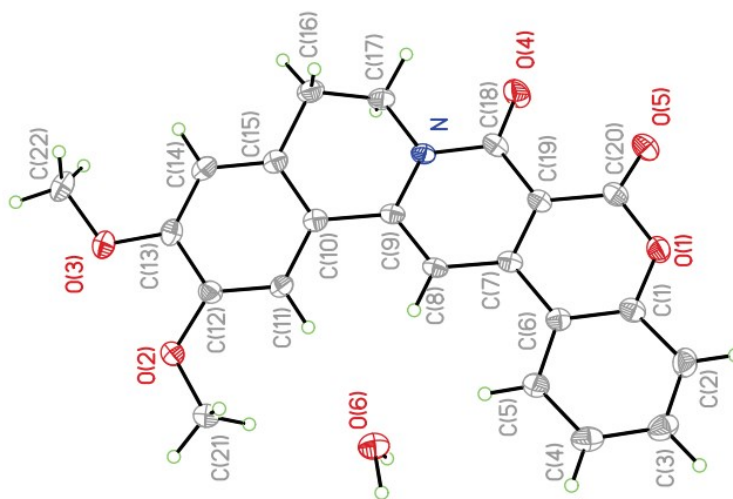

**Figure S1:** ORTEP diagram of compound **6a**. The ellipsoid contour probability levels: 50%

**Table S1.** Crystal data and structure refinement of compound **6a**.

|                                   |                                                  |                  |
|-----------------------------------|--------------------------------------------------|------------------|
| Identification code               | CS-140                                           |                  |
| Empirical formula                 | C <sub>22</sub> H <sub>19</sub> N O <sub>6</sub> |                  |
| Formula weight                    | 393.38                                           |                  |
| Temperature                       | 150(2) K                                         |                  |
| Wavelength                        | 0.71073 Å                                        |                  |
| Crystal system                    | Monoclinic                                       |                  |
| Space group                       | P2 <sub>1</sub> /c                               |                  |
| Unit cell dimensions              | a = 9.0475(10) Å                                 | a = 90°.         |
|                                   | b = 20.289(3) Å                                  | b = 101.000(5)°. |
|                                   | c = 9.7241(13) Å                                 | g = 90°.         |
| Volume                            | 1752.2(4) Å <sup>3</sup>                         |                  |
| Z                                 | 4                                                |                  |
| Density (calculated)              | 1.491 Mg/m <sup>3</sup>                          |                  |
| Absorption coefficient            | 0.109 mm <sup>-1</sup>                           |                  |
| F(000)                            | 824                                              |                  |
| Crystal size                      | 0.560 x 0.200 x 0.110 mm <sup>3</sup>            |                  |
| Theta range for data collection   | 2.930 to 26.411°.                                |                  |
| Index ranges                      | -11 ≤ h ≤ 11, -25 ≤ k ≤ 25, -12 ≤ l ≤ 12         |                  |
| Reflections collected             | 29436                                            |                  |
| Independent reflections           | 3569 [R(int) = 0.0513]                           |                  |
| Completeness to theta = 25.242°   | 99.8 %                                           |                  |
| Absorption correction             | Semi-empirical from equivalents                  |                  |
| Max. and min. transmission        | 0.9281 and 0.8106                                |                  |
| Refinement method                 | Full-matrix least-squares on F <sup>2</sup>      |                  |
| Data / restraints / parameters    | 3569 / 0 / 270                                   |                  |
| Goodness-of-fit on F <sup>2</sup> | 1.010                                            |                  |
| Final R indices [I > 2σ(I)]       | R1 = 0.0411, wR2 = 0.1007                        |                  |
| R indices (all data)              | R1 = 0.0610, wR2 = 0.1156                        |                  |
| Extinction coefficient            | n/a                                              |                  |
| Largest diff. peak and hole       | 0.231 and -0.255 e.Å <sup>-3</sup>               |                  |

X-ray crystallographic data of compound **6b** (CCDC-2012710)

Single crystal of **6b** was obtained by slow evaporation from a mixture of dichloromethane and *n*-hexane at 25 °C. Single-crystal X-ray data were collected at 150 K on a Bruker APEX-II CCD diffractometer using graphite-monochromated Mo KR radiation ( $\lambda = 0.71073 \text{ \AA}$ ). The crystal structures were solved by using SHELXS-97 and the structures were refined using SHELXL-97 2014. All non-hydrogen atoms were refined anisotropically. Hydrogen atoms were fixed at geometrically calculated positions and were refined using riding model.

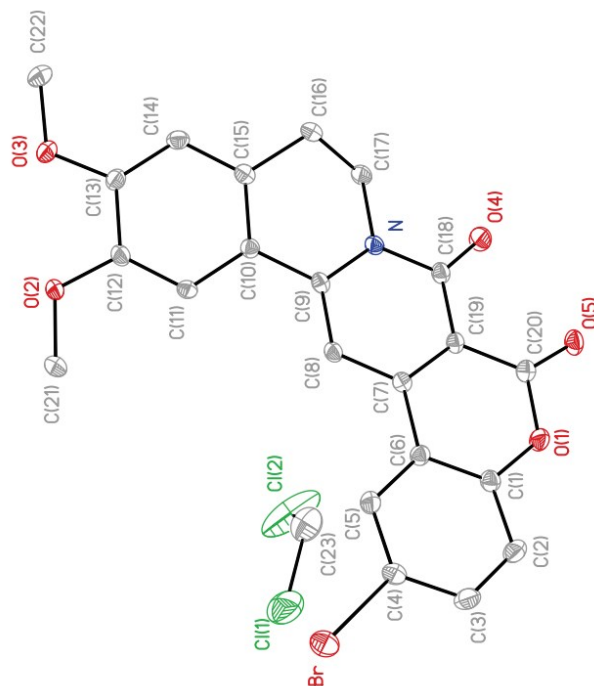

**Figure S2:** ORTEP diagram of compound **6b**. The ellipsoid contour probability levels: 50%

**Table S2.** Crystal data and structure refinement for compound **6b**.

|                                   |                                                                     |                    |
|-----------------------------------|---------------------------------------------------------------------|--------------------|
| Identification code               | CS-465                                                              |                    |
| Empirical formula                 | C <sub>23</sub> H <sub>18</sub> Br Cl <sub>2</sub> N O <sub>5</sub> |                    |
| Formula weight                    | 539.19                                                              |                    |
| Temperature                       | 150(2) K                                                            |                    |
| Wavelength                        | 0.71073 Å                                                           |                    |
| Crystal system                    | Monoclinic                                                          |                    |
| Space group                       | P2 <sub>1</sub> /c                                                  |                    |
| Unit cell dimensions              | a = 15.9528(6) Å                                                    | a = 90°.           |
|                                   | b = 9.8435(4) Å                                                     | b = 110.3485(16)°. |
|                                   | c = 14.8269(5) Å                                                    | g = 90°.           |
| Volume                            | 2182.99(14) Å <sup>3</sup>                                          |                    |
| Z                                 | 4                                                                   |                    |
| Density (calculated)              | 1.641 Mg/m <sup>3</sup>                                             |                    |
| Absorption coefficient            | 2.165 mm <sup>-1</sup>                                              |                    |
| F(000)                            | 1088                                                                |                    |
| Crystal size                      | 0.480 x 0.340 x 0.290 mm <sup>3</sup>                               |                    |
| Theta range for data collection   | 2.931 to 27.880°.                                                   |                    |
| Index ranges                      | -20 ≤ h ≤ 20, -12 ≤ k ≤ 12, -19 ≤ l ≤ 19                            |                    |
| Reflections collected             | 39472                                                               |                    |
| Independent reflections           | 5168 [R(int) = 0.0386]                                              |                    |
| Completeness to theta = 25.242°   | 99.0 %                                                              |                    |
| Absorption correction             | Semi-empirical from equivalents                                     |                    |
| Max. and min. transmission        | 0.9281 and 0.7973                                                   |                    |
| Refinement method                 | Full-matrix least-squares on F <sup>2</sup>                         |                    |
| Data / restraints / parameters    | 5168 / 0 / 289                                                      |                    |
| Goodness-of-fit on F <sup>2</sup> | 1.017                                                               |                    |
| Final R indices [I > 2σ(I)]       | R1 = 0.0332, wR2 = 0.0837                                           |                    |
| R indices (all data)              | R1 = 0.0397, wR2 = 0.0879                                           |                    |
| Extinction coefficient            | n/a                                                                 |                    |
| Largest diff. peak and hole       | 1.274 and -0.989 e.Å <sup>-3</sup>                                  |                    |

X-ray crystallographic data of compound **6j** (CCDC-2036791)

Single crystal of **6j** was obtained by slow evaporation from a mixture of dichloromethane and *n*-hexane at 25 °C. Single-crystal X-ray data were collected at 150 K on a Bruker APEX-II CCD diffractometer using graphite-monochromated Mo KR radiation ( $\lambda = 0.71073 \text{ \AA}$ ). The crystal structures were solved by using SHELXS-97 and the structures were refined using SHELXL-97 2014. All non-hydrogen atoms were refined anisotropically. Hydrogen atoms were fixed at geometrically calculated positions and were refined using riding model.

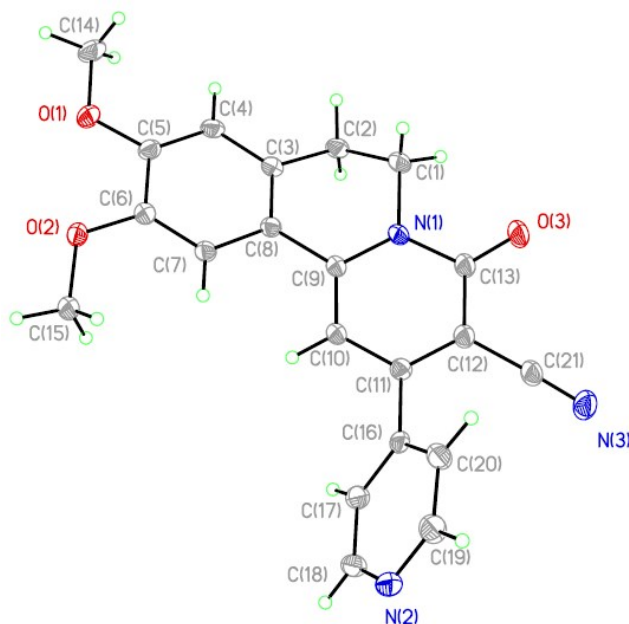

**Figure S3:** ORTEP diagram of compound **6j**. The ellipsoid contour probability levels: 50%

**Table S3.** Crystal data and structure refinement for compound **6j**.

|                                   |                                                               |                    |
|-----------------------------------|---------------------------------------------------------------|--------------------|
| Identification code               | CS-565                                                        |                    |
| Empirical formula                 | C <sub>21</sub> H <sub>17</sub> N <sub>3</sub> O <sub>3</sub> |                    |
| Formula weight                    | 359.38                                                        |                    |
| Temperature                       | 150(2) K                                                      |                    |
| Wavelength                        | 0.71073 Å                                                     |                    |
| Crystal system                    | Monoclinic                                                    |                    |
| Space group                       | P2 <sub>1</sub> /c                                            |                    |
| Unit cell dimensions              | a = 12.4264(5) Å                                              | a = 90°.           |
|                                   | b = 14.8397(5) Å                                              | b = 111.5859(14)°. |
|                                   | c = 9.9773(4) Å                                               | g = 90°.           |
| Volume                            | 1710.82(11) Å <sup>3</sup>                                    |                    |
| Z                                 | 4                                                             |                    |
| Density (calculated)              | 1.395 Mg/m <sup>3</sup>                                       |                    |
| Absorption coefficient            | 0.095 mm <sup>-1</sup>                                        |                    |
| F(000)                            | 752                                                           |                    |
| Crystal size                      | 0.480 x 0.310 x 0.150 mm <sup>3</sup>                         |                    |
| Theta range for data collection   | 3.263 to 27.905°.                                             |                    |
| Index ranges                      | -16 ≤ h ≤ 16, -17 ≤ k ≤ 19, -13 ≤ l ≤ 13                      |                    |
| Reflections collected             | 21544                                                         |                    |
| Independent reflections           | 4076 [R(int) = 0.0465]                                        |                    |
| Completeness to theta = 25.242°   | 99.6 %                                                        |                    |
| Absorption correction             | Semi-empirical from equivalents                               |                    |
| Max. and min. transmission        | 0.9281 and 0.8662                                             |                    |
| Refinement method                 | Full-matrix least-squares on F <sup>2</sup>                   |                    |
| Data / restraints / parameters    | 4076 / 0 / 244                                                |                    |
| Goodness-of-fit on F <sup>2</sup> | 1.017                                                         |                    |
| Final R indices [I > 2σ(I)]       | R1 = 0.0433, wR2 = 0.1114                                     |                    |
| R indices (all data)              | R1 = 0.0523, wR2 = 0.1177                                     |                    |
| Extinction coefficient            | n/a                                                           |                    |
| Largest diff. peak and hole       | 0.344 and -0.228 e.Å <sup>-3</sup>                            |                    |

X-ray crystallographic data of compound **8b** (CCDC- 2012685)

Single crystal of **8b** was obtained by slow evaporation of methanol from a mixture at 25 °C. Single-crystal X-ray data were collected at 150 K on a Bruker APEX-II CCD diffractometer using graphite-monochromated Mo KR radiation ( $\lambda = 0.71073 \text{ \AA}$ ). The crystal structures were solved by using SHELXS-97 and the structures were refined using SHELXL-97 2014. All non-hydrogen atoms were refined anisotropically. Hydrogen atoms were fixed at geometrically calculated positions and were refined using riding model.

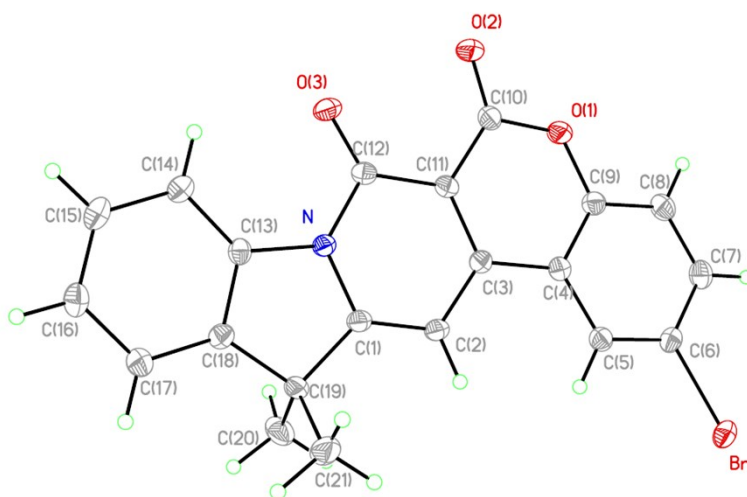

**Figure S4:** ORTEP diagram of compound **8b**. The ellipsoid contour probability levels: 50%

**Table S4.** Crystal data and structure refinement for compound **8b**.

|                                   |                                                     |                    |
|-----------------------------------|-----------------------------------------------------|--------------------|
| Identification code               | CS-509                                              |                    |
| Empirical formula                 | C <sub>21</sub> H <sub>14</sub> Br N O <sub>3</sub> |                    |
| Formula weight                    | 408.24                                              |                    |
| Temperature                       | 150(2) K                                            |                    |
| Wavelength                        | 0.71073 Å                                           |                    |
| Crystal system                    | Triclinic                                           |                    |
| Space group                       | P-1                                                 |                    |
| Unit cell dimensions              | a = 8.4713(4) Å                                     | a = 94.9324(17)°.  |
|                                   | b = 10.0832(5) Å                                    | b = 105.5420(17)°. |
|                                   | c = 10.7844(5) Å                                    | g = 108.9946(16)°. |
| Volume                            | 823.87(7) Å <sup>3</sup>                            |                    |
| Z                                 | 2                                                   |                    |
| Density (calculated)              | 1.646 Mg/m <sup>3</sup>                             |                    |
| Absorption coefficient            | 2.517 mm <sup>-1</sup>                              |                    |
| F(000)                            | 412                                                 |                    |
| Crystal size                      | 0.500 x 0.370 x 0.330 mm <sup>3</sup>               |                    |
| Theta range for data collection   | 3.658 to 27.949°.                                   |                    |
| Index ranges                      | -11 ≤ h ≤ 11, -13 ≤ k ≤ 13, -14 ≤ l ≤ 13            |                    |
| Reflections collected             | 17024                                               |                    |
| Independent reflections           | 3911 [R(int) = 0.0286]                              |                    |
| Completeness to theta = 25.242°   | 99.0 %                                              |                    |
| Absorption correction             | Semi-empirical from equivalents                     |                    |
| Max. and min. transmission        | 0.9281 and 0.8156                                   |                    |
| Refinement method                 | Full-matrix least-squares on F <sup>2</sup>         |                    |
| Data / restraints / parameters    | 3911 / 0 / 235                                      |                    |
| Goodness-of-fit on F <sup>2</sup> | 1.059                                               |                    |
| Final R indices [I > 2σ(I)]       | R1 = 0.0210, wR2 = 0.0535                           |                    |
| R indices (all data)              | R1 = 0.0233, wR2 = 0.0546                           |                    |
| Extinction coefficient            | n/a                                                 |                    |
| Largest diff. peak and hole       | 0.331 and -0.285 e.Å <sup>-3</sup>                  |                    |

X-ray crystallographic data of compound **11** (CCDC-2012684)

Single crystal of **11** was obtained by slow evaporation from a mixture of dichloromethane and *n*-hexane at 25 °C. Single-crystal X-ray data were collected at 150 K on a Bruker APEX-II CCD diffractometer using graphite-monochromated Mo KR radiation ( $\lambda = 0.71073 \text{ \AA}$ ). The crystal structures were solved by using SHELXS-97 and the structures were refined using SHELXL-97 2014. All non-hydrogen atoms were refined anisotropically. Hydrogen atoms were fixed at geometrically calculated positions and were refined using riding model.

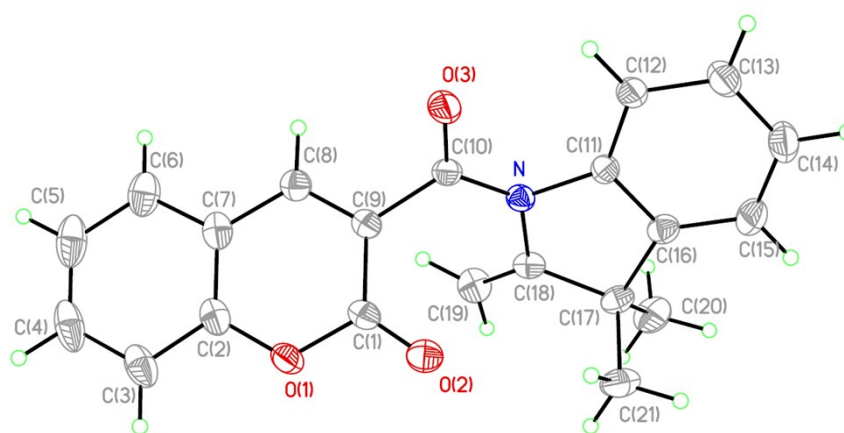

**Figure S5:** ORTEP diagram of compound **11**. The ellipsoid contour probability levels: 50%

**Table S5.** Crystal data and structure refinement of compound **11**.

|                                   |                                                  |                    |
|-----------------------------------|--------------------------------------------------|--------------------|
| Identification code               | CS-506A                                          |                    |
| Empirical formula                 | C <sub>21</sub> H <sub>17</sub> N O <sub>3</sub> |                    |
| Formula weight                    | 331.36                                           |                    |
| Temperature                       | 150(2) K                                         |                    |
| Wavelength                        | 0.71073 Å                                        |                    |
| Crystal system                    | Monoclinic                                       |                    |
| Space group                       | P2 <sub>1</sub> /c                               |                    |
| Unit cell dimensions              | a = 8.9048(2) Å                                  | a = 90°.           |
|                                   | b = 19.0917(5) Å                                 | b = 106.2045(12)°. |
|                                   | c = 10.2276(3) Å                                 | g = 90°.           |
| Volume                            | 1669.69(8) Å <sup>3</sup>                        |                    |
| Z                                 | 4                                                |                    |
| Density (calculated)              | 1.318 Mg/m <sup>3</sup>                          |                    |
| Absorption coefficient            | 0.088 mm <sup>-1</sup>                           |                    |
| F(000)                            | 696                                              |                    |
| Crystal size                      | 0.470 x 0.310 x 0.180 mm <sup>3</sup>            |                    |
| Theta range for data collection   | 3.198 to 27.881°.                                |                    |
| Index ranges                      | -11 ≤ h ≤ 11, -25 ≤ k ≤ 25, -13 ≤ l ≤ 13         |                    |
| Reflections collected             | 28812                                            |                    |
| Independent reflections           | 3965 [R(int) = 0.0356]                           |                    |
| Completeness to theta = 25.242°   | 99.2 %                                           |                    |
| Absorption correction             | Semi-empirical from equivalents                  |                    |
| Max. and min. transmission        | 0.9281 and 0.8741                                |                    |
| Refinement method                 | Full-matrix least-squares on F <sup>2</sup>      |                    |
| Data / restraints / parameters    | 3965 / 0 / 234                                   |                    |
| Goodness-of-fit on F <sup>2</sup> | 1.004                                            |                    |
| Final R indices [I > 2σ(I)]       | R1 = 0.0392, wR2 = 0.1044                        |                    |
| R indices (all data)              | R1 = 0.0486, wR2 = 0.1126                        |                    |
| Extinction coefficient            | n/a                                              |                    |
| Largest diff. peak and hole       | 0.323 and -0.188 e.Å <sup>-3</sup>               |                    |

General procedure A for preparation of compound **4**.

To a stirred solution of commercially available imine **1** (0.5 mmol) and triethylamine (1.5 mmol) in dry toluene (3 mL) was added dropwise acid chloride **2** (0.55 mmol) at 0 °C. The resulting mixture was stirred at room temperature for 1 h. After that, the mixture was diluted with degassed dry acetonitrile (100 mL) and irradiated with UV light (352 nm) in a Rayonet photoreactor for 2 h at room temperature. After completion of the reaction, the solution was evaporated and the residue was diluted with ethyl acetate (100 mL), washed with 5 N HCl (30 mL), water (30 mL) and brine (30 mL). The organic layer was then dried over anhydrous MgSO<sub>4</sub> and concentrated under reduced pressure to provide the crude product which was further purified by column chromatography to obtain the desired compound.

#### 9, 10-Dimethoxy-2-phenyl-6,7-dihydro-4*H*-pyrido[2, 1-*a*]isoquinolin-4-one (**4**).

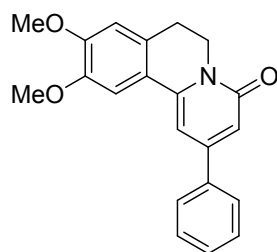

The title compound **4** was synthesized following general procedure A from imine **1** (103 mg, 0.5 mmol), triethylamine (101 mg, 1.5 mmol) and cinnamoyl chloride (**2**, 92 mg, 0.55 mmol), and purified by flash column chromatography (50% EtOAc in hexanes) to give a yellow solid (64 mg, 38% yield).  $R_f$  = 0.3 (50% EtOAc/hexanes). mp 156–158 °C. <sup>1</sup>H NMR (CDCl<sub>3</sub>, 400 MHz)  $\delta$ : 7.66–7.63 (m, 2H), 7.52–7.45 (m, 3H), 7.23 (s, 1H), 6.79 (d,  $J$  = 2.0 Hz, 1H), 6.77 (s, 1H), 6.75 (d,  $J$  = 2.0 Hz, 1H), 4.31 (t,  $J$  = 6.0 Hz, 2H), 3.96 (s, 3H), 3.95 (s, 3H), 2.96 (t,  $J$  = 6.0 Hz, 2H). <sup>13</sup>C{<sup>1</sup>H} NMR (CDCl<sub>3</sub>, 100 MHz)  $\delta$ : 162.8, 151.2, 151.1, 148.5, 143.3, 138.4, 129.3, 129.2, 129.0 (2C), 126.8 (2C), 121.7, 114.4, 110.5, 108.2, 101.7, 56.3, 56.1, 39.3, 27.6. IR  $\nu_{max}$  (neat): 2947, 1716, 1655, 1565, 1217, 875, 750 cm<sup>-1</sup>. HRMS (EI)  $m/z$ : [ $M^+$ ] calcd for C<sub>21</sub>H<sub>19</sub>NO<sub>3</sub>, 333.1365; found, 333.1357.

General procedure B for preparation of compounds **6a–m**.

To a stirred solution of commercially available imine **1** (0.5 mmol) and triethylamine (1.5 mmol) in dry toluene (5 mL) was added acid chloride **5** (0.55 mmol) at 0 °C. The resulting mixture was stirred at room temperature for 1 h and then refluxed for 2 h in oil bath. After completion of the reaction, the mixture was cooled to room temperature and diluted with dichloromethane (100 mL). The solution was washed sequentially with 5 N HCl (30 mL), water (30 mL) and brine (30 mL). The organic phase was then dried over anhydrous MgSO<sub>4</sub> and concentrated *in vacuum* to provide the crude product which was further purified by column chromatography to obtain the desired compound.

**12,13-Dimethoxy-9,10-dihydrochromeno[4',3':4,5]pyrido[2,1-*a*]isoquinoline-6,7-dione (6a).**

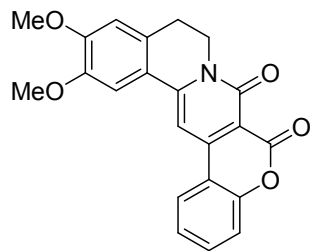

The title compound **6a** was synthesized following general procedure B from imine **1** (103 mg, 0.5 mmol), triethylamine (101 mg, 1.5 mmol), and 2-oxo-2*H*-chromene-3-carbonyl chloride (**5a**, 115 mg, 0.55 mmol), and purified by flash column chromatography (3% MeOH in DCM) to give a yellow solid (136 mg, 72% yield).  $R_f$  = 0.5 (5% MeOH/DCM). mp 252–254 °C.  $^1\text{H}$  NMR ( $\text{CDCl}_3$ , 400 MHz)  $\delta$ : 8.01 (dd,  $J$  = 8.0, 1.2 Hz, 1H), 7.61 (td,  $J$  = 8.0, 1.2 Hz, 1H), 7.38–7.32 (m, 3H), 7.10 (s, 1H), 6.82 (s, 1H), 4.35 (t,  $J$  = 6.4 Hz, 2H), 4.10 (s, 3H), 3.99 (s, 3H), 2.98 (t,  $J$  = 6.4 Hz, 2H).  $^{13}\text{C}\{^1\text{H}\}$  NMR ( $\text{CDCl}_3$ , 100 MHz)  $\delta$ : 159.5, 157.5, 154.1, 152.9, 149.3, 149.0, 148.0, 133.5, 131.1, 124.3 (2C), 120.5, 117.9, 116.2, 110.7, 109.1, 105.3, 94.0, 56.7, 56.4, 39.6, 27.5. IR  $\nu_{\text{max}}$  (neat): 2898, 1745, 1647, 1565, 1425, 1217, 875, 750  $\text{cm}^{-1}$ . HRMS (EI)  $m/z$ :  $[\text{M}^+]$  calcd for  $\text{C}_{22}\text{H}_{17}\text{NO}_5$ , 375.1107; found, 375.1104.

**2-Bromo-12,13-dimethoxy-9,10-dihydrochromeno[4',3':4,5]pyrido[2,1-*a*]isoquinoline-6,7-dione (6b).**

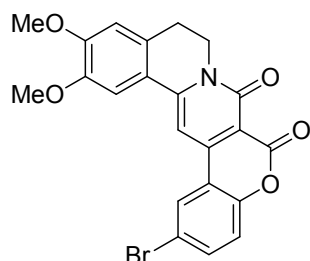

The title compound **6b** was synthesized following general procedure B from imine **1** (103 mg, 0.5 mmol), triethylamine (101 mg, 1.5 mmol), and 6-bromo-2-oxo-2*H*-chromene-3-carbonyl chloride (**5b**, 158 mg, 0.55 mmol), and purified by flash column chromatography (2% MeOH in DCM) to give a yellow solid (189 mg, 83% yield).  $R_f$  = 0.6 (5% MeOH/DCM). mp 306–308 °C.  $^1\text{H}$  NMR ( $\text{CDCl}_3$ , 400 MHz)  $\delta$ : 8.09 (d,  $J$  = 2.0 Hz, 1H), 7.67 (dd,  $J$  = 8.8, 2.0 Hz, 1H), 7.34 (s, 1H), 7.25 (d,  $J$  = 9.2 Hz, 1H), 6.99 (s, 1H), 6.82 (s, 1H), 4.37 (t,  $J$  = 6.8 Hz, 2H), 4.07 (s, 3H), 4.00 (s, 3H), 2.99 (t,  $J$  = 6.8 Hz, 2H).  $^{13}\text{C}\{^1\text{H}\}$  NMR ( $\text{CDCl}_3$ , 100 MHz)  $\delta$ : 159.6, 157.4, 153.2, 152.6, 150.0, 148.9, 147.0, 136.3, 131.3, 127.0, 120.1, 119.5, 117.8, 117.1, 110.7, 109.4, 104.7, 94.4, 56.7, 56.2, 39.7, 27.2. IR  $\nu_{\text{max}}$  (neat): 2897, 1716, 1620, 1565, 1425, 1217, 875, 650  $\text{cm}^{-1}$ . HRMS (EI)  $m/z$ :  $[\text{M}^+]$  calcd for  $\text{C}_{22}\text{H}_{16}\text{BrNO}_5$ , 453.0212; found, 453.0217.

**2,3,12,13-Tetramethoxy-9,10-dihydrochromeno[4',3':4,5]pyrido[2,1-*a*]isoquinoline-6,7-dione (6c).**

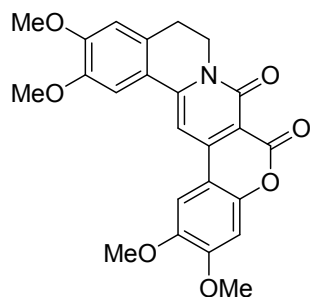

The title compound **6c** was synthesized following general procedure B from imine **1** (103 mg, 0.5 mmol), triethylamine (101 mg, 1.5 mmol), and 6,7-dimethoxy-2-oxo-2*H*-chromene-3-carbonyl chloride (**5c**, 148 mg, 0.55 mmol), and purified by flash column chromatography (5% MeOH in DCM) to give a yellow solid (138 mg, 63% yield).  $R_f$  = 0.3 (5% MeOH/DCM). mp 298–300 °C.  $^1\text{H}$  NMR ( $\text{CDCl}_3$ , 400 MHz)  $\delta$ : 7.36 (s, 1H), 7.28 (s, 1H), 6.88 (s, 1H), 6.81 (s, 1H), 6.79 (s, 1H), 4.31 (t,  $J$  = 6.4 Hz, 2H), 4.04 (s, 3H), 4.02 (s, 3H), 3.99 (s, 3H), 3.95 (s, 3H), 2.96 (t,  $J$  = 6.4 Hz, 2H).  $^{13}\text{C}\{^1\text{H}\}$  NMR ( $\text{CDCl}_3$ , 100 MHz)  $\delta$ : 160.0, 158.5, 154.5, 152.9, 150.0, 149.0, 148.8, 148.2, 146.5, 131.2, 120.4, 110.6, 109.8, 108.0, 105.6, 103.3, 100.4, 94.3, 56.9, 56.8, 56.4, 56.2, 39.4, 27.3. IR  $\nu_{\text{max}}$  (neat): 2942, 1738, 1687, 1565, 1425, 1217, 785, 632  $\text{cm}^{-1}$ . HRMS (EI)  $m/z$ : [ $\text{M}^+$ ] calcd for  $\text{C}_{24}\text{H}_{21}\text{NO}_7$ , 435.1318; found, 435.1313.

**12,13-Dimethoxy-9,10-dihydro-5*H*-benzo[*f*]isoquinolino[2,1-*b*][2,7]naphthyridine-6,7-dione (6d).**

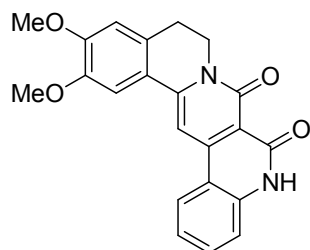

The title compound **6d** was synthesized following general procedure B from imine **1** (103 mg, 0.5 mmol), triethylamine (101 mg, 1.5 mmol), and 2-oxo-1,2-dihydroquinoline-3-carbonyl chloride (**5d**, 114 mg, 0.55 mmol), and purified by flash column chromatography (10% MeOH in DCM) to give a yellow solid (135 mg, 72% yield).  $R_f$  = 0.4 (10% MeOH/DCM). mp 382–384 °C.  $^1\text{H}$  NMR ( $\text{CD}_3\text{OD}$ , 400 MHz)  $\delta$ : 8.68 (d,  $J$  = 8.0 Hz, 1H), 7.95 (s, 1H), 7.78–7.75 (m, 2H), 7.52–7.47 (m, 2H), 7.05 (s, 1H), 4.47 (t,  $J$  = 6.4 Hz, 2H), 4.05 (s, 3H), 3.97 (s, 3H), 3.10 (t,  $J$  = 6.4 Hz, 2H).  $^{13}\text{C}\{^1\text{H}\}$  NMR ( $\text{CD}_3\text{OD}$ , 100 MHz)  $\delta$ : 161.9, 161.8, 153.0, 149.1, 148.0, 147.3, 138.4, 133.2, 131.0, 125.4, 123.6, 120.1, 116.4, 116.2, 110.5 (2C), 109.8, 97.8, 55.8, 55.3, 40.2, 26.6. IR  $\nu_{\text{max}}$  (neat): 3025, 2912, 1722, 1667, 1515, 1392, 1217, 812, 742  $\text{cm}^{-1}$ . HRMS (EI)  $m/z$ : [ $\text{M}^+$ ] calcd for  $\text{C}_{22}\text{H}_{18}\text{N}_2\text{O}_4$ , 374.1267; found, 374.1261.

**15-(3,4-Dimethoxyphenyl)-12,13-dimethoxy-9,10-dihydrochromeno[4',3':4,5]pyrido[2,1-a]isoquinoline-6,7-dione (6e).**

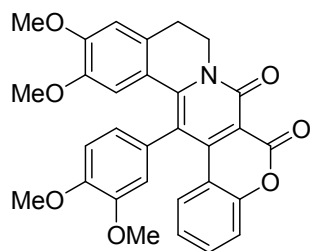

The title compound **6e** was synthesized following general procedure B from imine **1e** (171 mg, 0.5 mmol), triethylamine (101 mg, 1.5 mmol), and 2-oxo-2*H*-chromene-3-carbonyl chloride (**5e**, 115 mg, 0.55 mmol), and purified by flash column chromatography (5% MeOH in DCM) to give a yellow solid (175 mg, 68% yield).  $R_f$  = 0.4 (7% MeOH/DCM). mp 230–232 °C.  $^1\text{H}$  NMR ( $\text{CDCl}_3$ , 400 MHz)  $\delta$ : 7.39–7.35 (m, 1H), 7.28 (d,  $J$  = 8.0 Hz, 1H), 6.90 (d,  $J$  = 8.0 Hz, 1H), 6.78–6.70 (m, 5H), 6.88 (s, 1H), 6.33 (s, 1H), 4.46–4.42 (m, 1H), 4.18–4.08 (m, 1H), 3.94 (s, 3H), 3.92 (s, 3H), 3.68 (s, 3H), 3.25 (s, 3H), 2.94 (t,  $J$  = 6.0 Hz, 2H).  $^{13}\text{C}\{^1\text{H}\}$  NMR ( $\text{CDCl}_3$ , 100 MHz)  $\delta$ : 158.8, 157.5, 153.8, 150.7, 150.4, 149.5, 149.2, 148.0, 146.4, 132.8, 132.2, 131.1, 128.9, 124.8, 122.6, 121.0, 117.6, 117.0, 115.2, 114.6, 114.0, 112.4, 109.5, 107.2, 56.3, 56.1, 56.0, 55.3, 41.8, 28.2. IR  $\nu_{\text{max}}$  (neat): 2980, 1721, 1660, 1512, 1405, 1209, 844, 630  $\text{cm}^{-1}$ . HRMS (EI)  $m/z$ : [ $\text{M}^+$ ] calcd for  $\text{C}_{30}\text{H}_{25}\text{NO}_7$ , 511.1631; found, 511.1633.

**15-(3,4-Dimethoxyphenyl)-2,3,12,13-tetramethoxy-9,10-dihydrochromeno[4',3':4,5]pyrido[2,1-a]isoquinoline-6,7-dione (6f).**

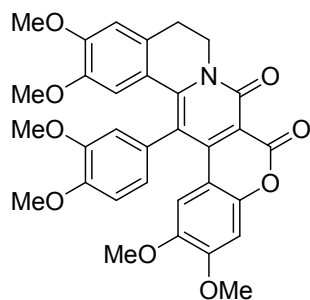

The title compound **6f** was synthesized following general procedure B from imine **1e** (171 mg, 0.5 mmol), triethylamine (101 mg, 1.5 mmol), and 6,7-dimethoxy-2-oxo-2*H*-chromene-3-carbonyl chloride (**5f**, 148 mg, 0.55 mmol), and purified by flash column chromatography (3% MeOH in DCM) to give a yellow solid (190 mg, 66% yield).  $R_f$  = 0.4 (10% MeOH/DCM). mp 270–272 °C.  $^1\text{H}$  NMR ( $\text{CDCl}_3$ , 400 MHz)  $\delta$ : 6.92 (d,  $J$  = 8.0 Hz, 1H), 6.81 (d,  $J$  = 8.0 Hz, 1H), 6.80 (s, 1H), 6.76 (s, 1H), 6.73 (s, 1H), 6.73 (s, 1H), 6.37 (s, 1H), 6.31 (s, 1H), 4.43–4.40 (m, 1H), 4.10–4.05 (m, 1H), 3.92 (s, 3H), 3.90 (s, 6H), 3.72 (s, 3H), 3.26 (s, 3H), 3.22 (s, 3H), 2.93 (t,  $J$  = 6.4 Hz, 2H).  $^{13}\text{C}\{^1\text{H}\}$  NMR ( $\text{CDCl}_3$ , 100 MHz)  $\delta$ : 159.0, 157.0, 152.7, 150.7, 150.5, 150.1, 149.4, 149.1, 147.5, 146.3, 144.2, 132.8, 131.5, 125.0, 121.0, 115.5, 113.9, 113.8, 112.5, 109.8, 109.5, 108.9, 105.7, 99.9, 56.4, 56.2 (2C), 56.0, 55.3, 55.2, 41.8, 28.3. IR  $\nu_{\text{max}}$  (neat): 2912, 1712, 1647, 1565, 1212, 812, 752  $\text{cm}^{-1}$ . HRMS (EI)  $m/z$ : [ $\text{M}^+$ ] calcd for  $\text{C}_{32}\text{H}_{29}\text{NO}_9$ , 571.1842; found, 571.1845.

**9,10-Dimethoxy-4-oxo-2-phenyl-6,7-dihydro-4*H*-pyrido[2,1-*a*]isoquinoline-3-carbonitrile (6g).**

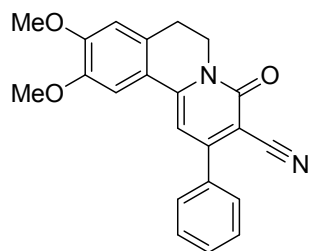

The title compound **6g** was synthesized following general procedure B from imine **1** (103 mg, 0.5 mmol), triethylamine (101 mg, 1.5 mmol) and (*E*)-2-cyano-3-phenylacryloyl chloride (**5g**, 105 mg, 0.55 mmol), and purified by flash column chromatography (40% EtOAc in hexanes) to give a yellow solid (122 mg, 68% yield).  $R_f = 0.3$  (50% EtOAc/hexanes). mp 184–186 °C.  $^1\text{H}$  NMR ( $\text{CDCl}_3$ , 400 MHz)  $\delta$ : 7.67–7.65 (m, 2H), 7.53–7.52 (m, 3H), 7.18 (s, 1H), 6.80 (s, 1H), 6.67 (s, 1H), 4.33 (t,  $J = 6.4$  Hz, 2H), 3.97 (s, 3H), 3.93 (s, 3H), 3.00 (t,  $J = 6.4$  Hz, 2H).  $^{13}\text{C}\{^1\text{H}\}$  NMR ( $\text{CDCl}_3$ , 100 MHz)  $\delta$ : 161.0, 158.5, 152.7, 149.0, 147.2, 136.6, 130.5 (2C), 129.1 (2C), 128.1 (2C), 120.2, 116.5, 110.7, 108.8, 103.3, 98.7, 56.5, 56.3, 40.0, 27.3. IR  $\nu_{\text{max}}$  (neat): 2910, 2205, 1716, 1645, 1501, 1211, 809, 710  $\text{cm}^{-1}$ . HRMS (EI)  $m/z$ :  $[\text{M}^+]$  calcd for  $\text{C}_{22}\text{H}_{18}\text{N}_2\text{O}_3$ , 358.1317; found, 358.1309.

**2-(2-Bromophenyl)-9,10-dimethoxy-4-oxo-6,7-dihydro-4*H*-pyrido[2,1-*a*]isoquinoline-3-carbonitrile (6h).**

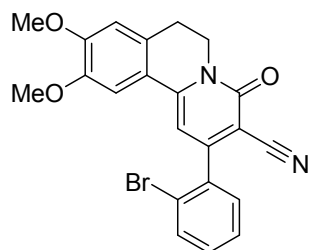

The title compound **6h** was synthesized following general procedure B from imine **1** (103 mg, 0.5 mmol), triethylamine (101 mg, 1.5 mmol) and (*E*)-3-(2-bromophenyl)-2-cyanoacryloyl chloride (**5h**, 149 mg, 0.55 mmol), and purified by flash column chromatography (35% EtOAc in hexanes) to give a yellow solid (182 mg, 83% yield).  $R_f = 0.45$  (50% EtOAc/hexanes). mp 210–212 °C.  $^1\text{H}$  NMR ( $\text{CDCl}_3$ , 400 MHz)  $\delta$ : 7.73 (d,  $J = 7.6$  Hz, 1H), 7.47 (t,  $J = 7.6$  Hz, 1H), 7.40 (dd,  $J = 7.6, 1.6$  Hz, 1H), 7.32 (td,  $J = 7.6, 1.6$  Hz, 1H), 7.14 (s, 1H), 6.79 (s, 1H), 6.59 (s, 1H), 4.36 (bs, 2H), 3.97 (s, 3H), 3.91 (s, 3H), 3.02 (t,  $J = 6.4$  Hz, 2H).  $^{13}\text{C}\{^1\text{H}\}$  NMR ( $\text{CDCl}_3$ , 100 MHz)  $\delta$ : 160.4, 158.0, 152.7, 148.9, 147.0, 137.5, 133.5, 131.1, 130.4, 129.8, 127.8, 121.2, 120.0, 115.4, 110.6, 108.6, 103.9, 100.8, 56.3, 56.2, 39.9, 27.1. IR  $\nu_{\text{max}}$  (neat): 2911, 2215, 1738, 1656, 1535, 1250, 875, 550  $\text{cm}^{-1}$ . HRMS (EI)  $m/z$ :  $[\text{M}^+]$  calcd for  $\text{C}_{22}\text{H}_{17}\text{BrN}_2\text{O}_3$ , 436.0423; found, 436.0426.

**2-(3,4-Dimethoxyphenyl)-9,10-dimethoxy-4-oxo-6,7-dihydro-4*H*-pyrido[2,1-*a*]isoquinoline-3-carbonitrile (6i).**

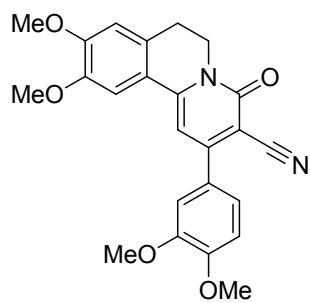

The title compound **6i** was synthesized following general procedure B from imine **1** (103 mg, 0.5 mmol), triethylamine (101 mg, 1.5 mmol) and (*E*)-2-cyano-3-(3,4-dimethoxyphenyl)acryloyl chloride (**5i**, 138 mg, 0.55 mmol), and purified by flash column chromatography (50% EtOAc in hexanes) to give a yellow solid (132 mg, 63% yield).  $R_f$  = 0.4 (60% EtOAc/hexanes). mp 262–264 °C.  $^1\text{H}$  NMR ( $\text{CDCl}_3$ , 400 MHz)  $\delta$ : 7.28–7.26 (m, 2H), 7.20 (s, 1H), 7.01 (d,  $J$  = 8.8 Hz, 1H), 6.79 (s, 1H), 6.67 (s, 1H), 4.33 (t,  $J$  = 6.4 Hz, 2H), 3.97 (s, 3H), 3.96 (s, 3H), 3.95 (s, 3H), 3.94 (s, 3H), 3.00 (t,  $J$  = 6.4 Hz, 2H).  $^{13}\text{C}\{^1\text{H}\}$  NMR ( $\text{CDCl}_3$ , 100 MHz)  $\delta$ : 161.1, 157.9, 152.7, 151.1, 149.1, 148.9, 146.9, 130.5, 128.8, 121.3, 120.2, 117.0, 111.4, 111.3, 110.7, 108.8, 103.1, 97.9, 56.5, 56.33, 56.31, 56.1, 39.9, 27.3. IR  $\nu_{\text{max}}$  (neat): 2999, 2225, 1728, 1641, 1565, 1217, 820, 716  $\text{cm}^{-1}$ . HRMS (EI)  $m/z$ :  $[\text{M}^+]$  calcd for  $\text{C}_{24}\text{H}_{22}\text{N}_2\text{O}_5$ , 418.1529; found, 418.1519.

**9,10-Dimethoxy-4-oxo-2-(pyridin-4-yl)-6,7-dihydro-4*H*-pyrido[2,1-*a*]isoquinoline-3-carbonitrile (6j).**

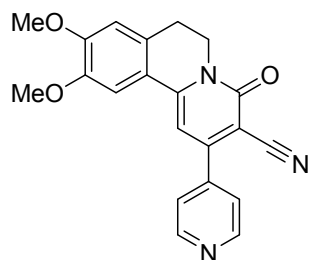

The title compound **6j** was synthesized following general procedure B from imine **1** (103 mg, 0.5 mmol), triethylamine (101 mg, 1.5 mmol) and (*E*)-2-cyano-3-(pyridin-4-yl)acryloyl chloride (**5j**, 106 mg, 0.55 mmol), and purified by flash column chromatography (1% MeOH in DCM) to give a yellow solid (139 mg, 77% yield).  $R_f$  = 0.5 (5% MeOH/DCM). mp 306–308 °C.  $^1\text{H}$  NMR ( $\text{CDCl}_3$ , 400 MHz)  $\delta$ : 8.80 (d,  $J$  = 6.0 Hz, 2H), 7.55 (d,  $J$  = 6.0 Hz, 2H), 7.28 (s, 1H), 6.81 (s, 1H), 6.62 (s, 1H), 4.35 (t,  $J$  = 6.4 Hz, 2H), 3.98 (s, 3H), 3.94 (s, 3H), 3.01 (t,  $J$  = 6.4 Hz, 2H).  $^{13}\text{C}\{^1\text{H}\}$  NMR ( $\text{CDCl}_3$ , 100 MHz)  $\delta$ : 160.4, 155.5, 153.0, 150.6 (3C), 149.0, 148.1, 144.0, 130.6, 122.2, 119.7, 115.6, 110.6, 108.7, 102.1, 98.6, 56.4, 56.3, 40.0, 27.1. IR  $\nu_{\text{max}}$  (neat): 2928, 2245, 1739, 1652, 1515, 1217, 885, 550  $\text{cm}^{-1}$ . HRMS (EI)  $m/z$ :  $[\text{M}^+]$  calcd for  $\text{C}_{21}\text{H}_{17}\text{N}_3\text{O}_3$ , 359.1270; found, 359.1277.

**Ethyl 9,10-dimethoxy-4-oxo-2-phenyl-6,7-dihydro-4H-pyrido[2,1-*a*]isoquinoline-3-carboxylate (6k).**

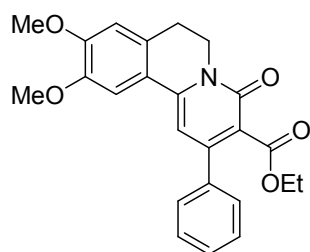

The title compound **6k** was synthesized following general procedure B from imine **1** (103 mg, 0.5 mmol), triethylamine (101 mg, 1.5 mmol) and (*E*)-ethyl 2-(chlorocarbonyl)-3-phenylacrylate (**5k**, 131 mg, 0.55 mmol), and purified by flash column chromatography (30% EtOAc in hexanes) to give a yellow solid (128 mg, 63% yield).  $R_f$  = 0.5 (50% EtOAc/hexanes). mp 156–158 °C.  $^1\text{H}$  NMR ( $\text{CDCl}_3$ , 400 MHz)  $\delta$ : 7.48–7.43 (m, 5H), 7.16 (s, 1H), 6.76 (s, 1H), 6.58 (s, 1H), 4.33 (t,  $J$  = 6.4 Hz, 2H), 4.16 (q,  $J$  = 6.4 Hz, 2H), 3.95 (s, 3H), 3.92 (s, 3H), 2.95 (t,  $J$  = 6.4 Hz, 2H), 1.05 (t,  $J$  = 6.4 Hz, 3H).  $^{13}\text{C}\{^1\text{H}\}$  NMR ( $\text{CDCl}_3$ , 100 MHz)  $\delta$ : 166.7, 159.7, 151.6, 150.5, 148.6, 143.9, 138.4, 129.5, 128.9, 128.6 (2C), 127.5 (2C), 120.9, 120.8, 110.5, 108.2, 103.1, 61.2, 56.3, 56.1, 39.4, 27.4, 13.8. IR  $_{\text{vmax}}$  (neat): 2941, 1708, 1655, 1480, 1217, 808, 655  $\text{cm}^{-1}$ . HRMS (EI)  $m/z$ :  $[\text{M}^+]$  calcd for  $\text{C}_{24}\text{H}_{23}\text{NO}_5$ , 405.1576; found, 405.1567.

**Methyl 9,10-dimethoxy-4-oxo-2-phenyl-6,7-dihydro-4H-pyrido[2,1-*a*]isoquinoline-3-carboxylate (6l).**

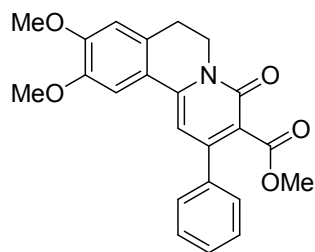

The title compound **6l** was synthesized following general procedure B from imine **1** (103 mg, 0.5 mmol), triethylamine (101 mg, 1.5 mmol) and (*E*)-methyl 2-(chlorocarbonyl)-3-phenylacrylate (**5l**, 124 mg, 0.55 mmol), and purified by flash column chromatography (30% EtOAc in hexanes) to give a yellow solid (122 mg, 62% yield).  $R_f$  = 0.45 (50% EtOAc/hexanes). mp 152–154 °C.  $^1\text{H}$  NMR ( $\text{CDCl}_3$ , 400 MHz)  $\delta$ : 7.46–7.45 (m, 5H), 7.16 (s, 1H), 6.77 (s, 1H), 6.58 (s, 1H), 4.33 (t,  $J$  = 6.4 Hz, 2H), 3.95 (s, 3H), 3.92 (s, 3H), 3.69 (s, 3H), 2.96 (t,  $J$  = 6.4 Hz, 2H).  $^{13}\text{C}\{^1\text{H}\}$  NMR ( $\text{CDCl}_3$ , 100 MHz)  $\delta$ : 167.3, 159.7, 151.6, 150.6, 148.6, 144.0, 138.3, 129.6, 129.1, 128.7 (2C), 127.5, 127.4 (2C), 120.8, 110.5, 108.2, 103.2, 56.3, 56.1, 52.3, 39.4, 27.2. IR  $_{\text{vmax}}$  (neat): 2922, 1754, 1638, 1532, 1311, 880, 690  $\text{cm}^{-1}$ . HRMS (EI)  $m/z$ :  $[\text{M}^+]$  calcd for  $\text{C}_{23}\text{H}_{21}\text{NO}_5$ , 391.1420; found, 391.1423.

**3-Acetyl-2-(2-chlorophenyl)-9,10-dimethoxy-6,7-dihydro-4H-pyrido[2,1-*a*]isoquinolin-4-one (6m).**

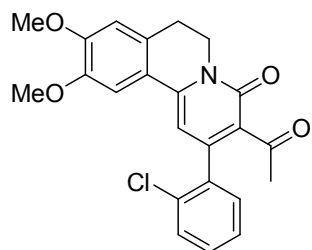

The title compound **6m** was synthesized following general procedure B from imine **1** (103 mg, 0.5 mmol), triethylamine (101 mg, 1.5 mmol) and (*E*)-2-(2-chlorobenzylidene)-3-oxobutanoyl chloride (**5m**, 134 mg, 0.55 mmol), and purified by flash column chromatography (25% EtOAc in hexanes) to give a yellow solid (134 mg, 65% yield).  $R_f$  = 0.55 (50% EtOAc/hexanes). mp 308–310 °C.  $^1\text{H}$  NMR ( $\text{CDCl}_3$ , 400 MHz)  $\delta$ : 8.01 (d,  $J$  = 8.0 Hz, 1H), 7.61 (t,  $J$  = 8.0 Hz, 1H), 7.37 (t,  $J$  = 8.0 Hz, 1H), 7.36 (s, 1H), 7.31 (d,  $J$  = 8.0 Hz, 1H), 7.10 (s, 1H), 6.82 (s, 1H), 4.34 (t,  $J$  = 6.4 Hz, 2H), 4.07 (s, 3H), 4.00 (s, 3H), 2.98 (t,  $J$  = 6.4 Hz, 2H), 1.77 (s, 3H).  $^{13}\text{C}\{^1\text{H}\}$  NMR ( $\text{CDCl}_3$ , 100 MHz)  $\delta$ : 159.5, 157.5, 154.0, 152.9, 149.3, 148.9, 148.0, 133.5, 131.1, 124.3 (2C), 120.5, 117.9, 116.1, 110.7, 109.0, 105.2, 94.0, 56.7, 56.4, 39.5, 31.7, 27.5. IR  $\nu_{\text{max}}$  (neat): 2947, 2345, 1738, 1649, 1565, 1425, 1217, 810, 659  $\text{cm}^{-1}$ . HRMS (EI)  $m/z$ : [ $\text{M}^+$ ] calcd for  $\text{C}_{23}\text{H}_{20}\text{ClNO}_4$ , 409.1081; found, 409.1085.

General procedure C for preparation of compounds **8a–d**.

To a stirred solution of 2-methyl indole **7** (0.5 mmol) and triethylamine (1.5 mmol) in dry toluene (3 mL) was added acid chloride **5** (0.55 mmol) at 0 °C. The resulting mixture was stirred at room temperature for 1 h and then refluxed in oil bath for 2 h. After completion of the reaction, the mixture was cooled to room temperature and diluted with ethyl acetate (100 mL). The solution was washed with 5 N HCl (30 mL), water (30 mL) and brine (30 mL). The organic phase was dried over anhydrous  $\text{MgSO}_4$ , filtered and evaporated under reduced pressure to give the crude product which was further purified by column chromatography to obtain the desired compound.

**13,13-Dimethyl-6H-chromeno[4',3':4,5]pyrido[1,2-*a*]indole-6,7(13H)-dione (8a).**

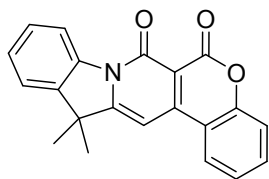

The title compound **8a** was synthesized following general procedure C from imine **7a** (80 mg, 0.5 mmol), triethylamine (101 mg, 1.5 mmol), and 2-oxo-2H-chromene-3-carbonyl chloride (**5a**, 115 mg, 0.55 mmol), and purified by flash column chromatography (40% EtOAc in hexanes) to give a white solid (135 mg, 82% yield).  $R_f$  = 0.3 (50% EtOAc/hexanes). mp 306–308 °C.  $^1\text{H}$  NMR ( $\text{CDCl}_3$ , 400 MHz)  $\delta$ : 8.84 (d,  $J$  = 8.0 Hz, 1H), 8.00 (d,  $J$  = 8.0 Hz, 1H), 7.65–7.61 (m, 1H), 7.48–7.35 (m, 5H), 6.95 (s, 1H), 1.66 (s, 6H).  $^{13}\text{C}\{^1\text{H}\}$  NMR ( $\text{CDCl}_3$ , 100 MHz)  $\delta$ : 164.9, 158.3, 157.2, 154.0, 149.0, 140.0, 139.0, 133.8, 128.9, 127.2, 124.7, 124.4, 122.1, 118.8, 117.8, 116.1, 107.6, 93.3, 46.8, 27.9 (2C). IR  $\nu_{\text{max}}$  (neat): 2998, 1740, 1655, 1425, 1217, 835, 750  $\text{cm}^{-1}$ . HRMS (EI)  $m/z$ : [ $\text{M}^+$ ] calcd for  $\text{C}_{21}\text{H}_{15}\text{NO}_3$ , 329.1052; found, 329.1056.

**2-Bromo-13,13-dimethyl-6H-chromeno[4',3':4,5]pyrido[1,2-a]indole-6,7(13H)-dione (8b).**

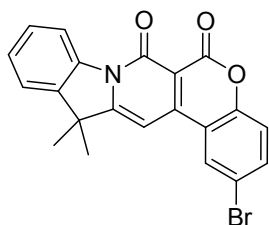

The title compound **8b** was synthesized following general procedure C from imine **7b** (80 mg, 0.5 mmol), triethylamine (101 mg, 1.5 mmol), and 6-bromo-2-oxo-2H-chromene-3-carbonyl chloride (**5b**, 158 mg, 0.55 mmol), and purified by flash column chromatography (35% EtOAc in hexanes) to give a white solid (190 mg, 93% yield).  $R_f$  = 0.4 (50% EtOAc/hexanes). mp 318–320 °C.  $^1\text{H}$  NMR ( $\text{CDCl}_3$ , 400 MHz,  $\delta$ ): 8.80 (d,  $J$  = 7.6 Hz, 1H), 8.11 (d,  $J$  = 2.0 Hz, 1H), 7.69 (dd,  $J$  = 8.8, 2.0 Hz, 1H), 7.47–7.37 (m, 3H), 7.23 (d,  $J$  = 8.8 Hz, 1H), 6.89 (s, 1H), 1.68 (s, 6H).  $^{13}\text{C}\{^1\text{H}\}$  NMR ( $\text{CDCl}_3$ , 100 MHz)  $\delta$ : 165.5, 158.0, 156.5, 152.9, 147.7, 139.9, 139.0, 136.4, 129.0, 127.5, 127.3, 122.1, 119.6, 118.9, 117.9, 117.1, 107.7, 93.1, 47.0, 27.8 (2C). IR  $\nu_{\text{max}}$  (neat): 2922, 1718, 1652, 1438, 1212, 880, 751  $\text{cm}^{-1}$ . HRMS (EI)  $m/z$ : [ $\text{M}^+$ ] calcd for  $\text{C}_{21}\text{H}_{14}\text{BrNO}_3$ , 407.0157; found, 407.0150.

**10-Chloro-13,13-dimethyl-6H-chromeno[4',3':4,5]pyrido[1,2-a]indole-6,7(13H)-dione (8c).**

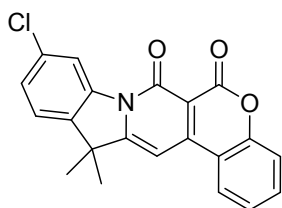

The title compound **8c** was synthesized following general procedure C from imine **7c** (97 mg, 0.5 mmol), triethylamine (101 mg, 1.5 mmol), and 2-oxo-2H-chromene-3-carbonyl chloride (**5a**, 115 mg, 0.55 mmol), and purified by flash column chromatography (35% EtOAc in hexanes) to give a white solid (140 mg, 77% yield).  $R_f$  = 0.45 (50% EtOAc/hexanes). mp 340–342 °C.  $^1\text{H}$  NMR ( $\text{CDCl}_3$ , 400 MHz)  $\delta$ : 8.77 (d,  $J$  = 8.4 Hz, 1H), 8.00 (d,  $J$  = 8.4 Hz, 1H), 7.65 (td,  $J$  = 8.4, 1.2 Hz, 1H), 7.43 (dd,  $J$  = 8.4, 2.0 Hz, 1H), 7.41–7.36 (m, 3H), 6.95 (s, 1H), 1.66 (s, 6H).  $^{13}\text{C}\{^1\text{H}\}$  NMR ( $\text{CDCl}_3$ , 100 MHz)  $\delta$ : 164.3, 158.0, 157.0, 154.1, 149.2, 140.9, 138.5, 134.0, 132.9, 129.1, 124.7, 124.5, 122.7, 119.8, 117.9, 116.0, 107.7, 93.5, 46.8, 27.8 (2C). IR  $\nu_{\text{max}}$  (neat): 2977, 1733, 1660, 1420, 1217, 875, 733  $\text{cm}^{-1}$ . HRMS (EI)  $m/z$ : [ $\text{M}^+$ ] calcd for  $\text{C}_{21}\text{H}_{14}\text{ClNO}_3$ , 363.0662; found, 363.0671.

**3-Methoxy-11,13,13-trimethyl-6H-chromeno[4',3':4,5]pyrido[1,2-a]indole-6,7(13H)-dione (8d).**

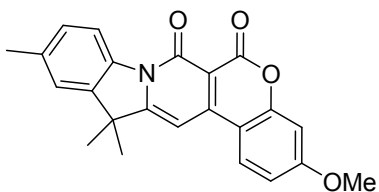

The title compound **8d** was synthesized following general procedure C from imine **7d** (87 mg, 0.5 mmol), triethylamine (101 mg, 1.5 mmol), and 7-methoxy-2-oxo-2H-chromene-3-carbonyl chloride (131 mg, 0.55 mmol), and purified by flash column chromatography (50% EtOAc in hexanes) to give a white solid (137 mg, 73% yield).  $R_f$  = 0.5 (80% EtOAc/hexanes). mp 298–300 °C.  $^1\text{H}$  NMR ( $\text{CDCl}_3$ , 400 MHz)  $\delta$ : 8.68 (d,  $J$  = 8.4 Hz, 1H), 7.87 (d,  $J$  = 9.2 Hz, 1H), 7.24 (d,  $J$  = 8.4 Hz, 1H), 7.19 (s, 1H), 6.92 (dd,  $J$  = 8.4, 2.4 Hz, 1H), 6.81–6.80 (m, 2H),

3.90 (s, 3H), 2.44 (s, 3H), 1.62 (s, 6H).  $^{13}\text{C}\{^1\text{H}\}$  NMR ( $\text{CDCl}_3$ , 100 MHz)  $\delta$ : 165.3, 164.3, 157.8, 156.7, 155.7, 149.6, 140.1, 138.0, 136.8, 129.1, 127.8, 123.7, 117.4, 113.0, 109.7, 104.7, 101.1, 94.7, 56.5, 46.7, 27.3 (2C), 21.4. IR  $\nu_{\text{max}}$  (neat): 2944, 1740, 1647, 1425, 1280, 888, 650  $\text{cm}^{-1}$ . HRMS (EI)  $m/z$ :  $[\text{M}^+]$  calcd for  $\text{C}_{23}\text{H}_{19}\text{NO}_4$ , 373.1314; found, 373.1315.

#### General procedure D for preparation of compounds **10a–d**.

To a stirred solution of enamine **9** (0.5 mmol) and triethylamine (1.5 mmol) in dry toluene (3 mL) was added acid chloride **5** (0.55 mmol) at 0 °C. The resulting mixture was stirred at room temperature for 1 h and then refluxed in oil bath for 2 h. After completion of the reaction, the mixture was cooled to room temperature and diluted with ethyl acetate (100 mL). The solution was washed with 5 N HCl (30 mL), water (30 mL) and brine (30 mL). The organic phase was dried over anhydrous  $\text{MgSO}_4$ , filtered and evaporated under reduced pressure to give the crude product which was further purified by column chromatography to obtain the desired compound.

#### Methyl 5-cyano-2-methyl-6-oxo-4-phenyl-1,6-dihydropyridine-3-carboxylate (**10a**).

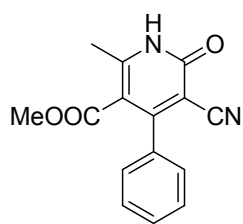

The title compound **10a** was synthesized following general procedure D from enamine **9** (58 mg, 0.5 mmol), triethylamine (101 mg, 1.5 mmol), and (*E*)-2-cyano-3-phenylacryloyl chloride (**5g**, 105 mg, 0.55 mmol), and purified by flash column chromatography (60% EtOAc in hexanes) to give a white solid (57 mg, 42% yield).  $R_f$  = 0.3 (80% EtOAc/hexanes). mp 300–302 °C.  $^1\text{H}$  NMR ( $\text{DMSO}-d_6$ , 400 MHz)  $\delta$ : 13.02 (s, 1H), 7.53–7.50 (m, 3H), 7.35–7.30 (m, 2H), 3.35 (s, 3H), 2.39 (s, 3H),  $^{13}\text{C}\{^1\text{H}\}$  NMR ( $\text{DMSO}-d_6$ , 100 MHz)  $\delta$ : 165.9, 160.3, 159.8, 153.5, 136.2, 130.0, 129.0 (2C), 127.6 (2C), 115.9, 112.4, 101.0, 52.4, 18.7. IR  $\nu_{\text{max}}$  (neat): 2983, 1745, 1622, 1415, 1271, 790, 630  $\text{cm}^{-1}$ . HRMS (EI)  $m/z$ :  $[\text{M}^+]$  calcd for  $\text{C}_{15}\text{H}_{12}\text{N}_2\text{O}_3$ , 268.0848; found, 268.0850.

#### Methyl 4-(2-bromophenyl)-5-cyano-2-methyl-6-oxo-1,6-dihydropyridine-3-carboxylate (**10b**).

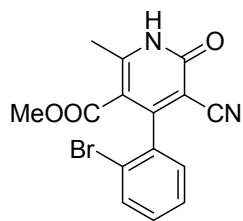

The title compound **10b** was synthesized following general procedure D from enamine **9** (58 mg, 0.5 mmol), triethylamine (101 mg, 1.5 mmol), and (*E*)-3-(2-bromophenyl)-2-cyanoacryloyl chloride (**5h**, 149 mg, 0.55 mmol), and purified by flash column chromatography (50% EtOAc in hexanes) to give a white solid (84 mg, 48% yield).  $R_f$  = 0.5 (80% EtOAc/hexanes). mp 228–230 °C.  $^1\text{H}$  NMR ( $\text{CDCl}_3$ , 400 MHz)  $\delta$ : 13.55 (s, 1H), 7.69 (d,  $J$  = 8.0 Hz, 1H), 7.44 (t,  $J$  = 8.0 Hz, 1H), 7.33 (td,  $J$  = 8.0, 1.2 Hz, 1H), 7.22 (dd,  $J$  = 8.0, 1.2 Hz, 1H), 3.48 (s, 3H), 2.71 (s, 3H),  $^{13}\text{C}\{^1\text{H}\}$  NMR ( $\text{DMSO}-d_6$ , 100 MHz)  $\delta$ : 164.8, 160.0, 159.5, 155.7, 137.6, 132.8, 131.3, 129.4, 128.2, 120.8, 115.1, 111.5, 102.3, 52.4, 19.5. IR  $\nu_{\text{max}}$  (neat): 2998, 1741, 1660, 1425, 1213, 860, 622  $\text{cm}^{-1}$ . HRMS (EI)  $m/z$ :  $[\text{M}^+]$  calcd for  $\text{C}_{15}\text{H}_{11}\text{BrN}_2\text{O}_3$ , 345.9953; found, 345.9950.

**Methyl 5-cyano-4-(3,4-dimethoxyphenyl)-2-methyl-6-oxo-1,6-dihydropyridine-3-carboxylate (10c).**

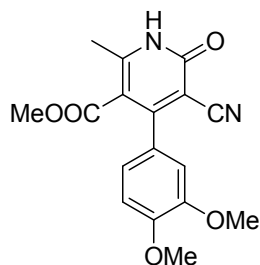

The title compound **10c** was synthesized following general procedure D from enamine **9** (58 mg, 0.5 mmol), triethylamine (101 mg, 1.5 mmol), and (*E*)-2-cyano-3-(3,4-dimethoxyphenyl)acryloyl chloride (**5i**, 138 mg, 0.55 mmol), and purified by flash column chromatography (2% MeOH in DCM) to give a white solid (70 mg, 43% yield).  $R_f$  = 0.35 (80% EtOAc/hexanes). mp 182–184 °C.  $^1\text{H}$  NMR ( $\text{CDCl}_3$ , 400 MHz)  $\delta$ : 13.59 (s, 1H), 7.00 (dd,  $J$  = 8.4, 2.0 Hz, 1H), 6.95 (d,  $J$  = 8.4 Hz, 1H), 6.90 (d,  $J$  = 2.0 Hz, 1H), 3.94 (s, 3H), 3.91 (s, 3H), 3.53 (s, 3H), 2.59 (s, 3H),  $^{13}\text{C}\{^1\text{H}\}$  NMR ( $\text{DMSO}-d_6$ , 100 MHz)  $\delta$ : 166.4, 160.5, 159.4, 152.5, 150.4, 148.8, 128.0, 120.8, 116.3, 112.8, 112.0, 111.1, 100.7, 56.1, 56.0, 52.7, 18.6. IR  $\nu_{\text{max}}$  (neat): 2992, 1740, 1632, 1414, 1270, 795, 630  $\text{cm}^{-1}$ . HRMS (EI)  $m/z$ :  $[\text{M}^+]$  calcd for  $\text{C}_{17}\text{H}_{16}\text{N}_2\text{O}_5$ , 328.1059; found, 328.1055.

**Methyl 5-cyano-2-methyl-4-(naphthalen-1-yl)-6-oxo-1,6-dihydropyridine-3-carboxylate (10d).**

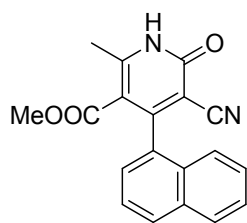

The title compound **10d** was synthesized following general procedure D from enamine **9** (58 mg, 0.5 mmol), triethylamine (101 mg, 1.5 mmol), and (*E*)-2-cyano-3-(naphthalen-1-yl)acryloyl chloride (**5n**, 133 mg, 0.55 mmol), and purified by flash column chromatography (1% MeOH in DCM) to give a white solid (89 mg, 56% yield).  $R_f$  = 0.4 (80% EtOAc/hexanes). mp 262–264 °C.  $^1\text{H}$  NMR ( $\text{DMSO}-d_6$ , 400 MHz)  $\delta$ : 13.13 (s, 1H), 8.03 (t,  $J$  = 7.6, Hz, 2H), 7.63–7.57 (m, 3H), 7.56–7.51 (m, 1H), 7.41 (dd,  $J$  = 7.6,  $J$  = 0.8 Hz, 1H), 3.02 (s, 3H), 2.47 (s, 3H),  $^{13}\text{C}\{^1\text{H}\}$  NMR ( $\text{DMSO}-d_6$ , 100 MHz)  $\delta$ : 165.4, 160.3, 159.4, 154.5, 134.1, 133.2, 130.0, 129.8, 128.8, 127.3, 126.8, 125.8, 125.6, 125.1, 115.7, 113.0, 102.8, 52.4, 19.2. IR  $\nu_{\text{max}}$  (neat): 2988, 1738, 1628, 1416, 1279, 792, 635  $\text{cm}^{-1}$ . HRMS (EI)  $m/z$ :  $[\text{M}^+]$  calcd for  $\text{C}_{19}\text{H}_{14}\text{N}_2\text{O}_3$ , 318.1004; found, 318.1006.

**Procedure for preparation of compound 11.**

To a stirred solution of 2-methyl indole **7a** (80 mg, 0.5 mmol) and triethylamine (101 mg, 1.5 mmol) in dry toluene (3 mL) was added acid chloride **5a** (115 mg, 0.55 mmol) at 0 °C. The resulting mixture was stirred at room temperature for 1 h. After completion of the reaction, the reaction mixture was diluted with ethyl acetate (100 mL). The organic phase was washed with 5 N HCl (30 mL), water (30 mL), brine (30 mL), dried over anhydrous  $\text{MgSO}_4$ , filtered and evaporated under reduced pressure to provide the crude product. The crude product was further purified by column chromatography to obtain the desired compound.

### 3-(3,3-Dimethyl-2-methyleneindoline-1-carbonyl)-2H-chromen-2-one (11).

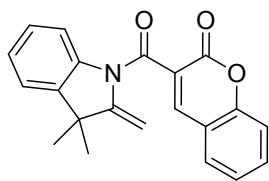

Yellow solid.  $R_f = 0.6$  (50% EtOAc/hexanes). 54 mg. Yield 32%. mp 136–138 °C.  $^1\text{H}$  NMR ( $\text{CDCl}_3$ , 400 MHz)  $\delta$ : 8.18 (s, 1H), 7.93 (d,  $J = 8.0$  Hz, 1H), 7.64–7.60 (m, 2H), 7.38–7.33 (m, 2H), 7.24–7.20 (m, 2H), 7.17–7.13 (m, 1H), 4.89 (d,  $J = 2.0$  Hz, 1H), 4.66 (d,  $J = 2.0$  Hz, 1H), 1.48 (s, 6H).  $^{13}\text{C}\{^1\text{H}\}$  NMR ( $\text{CDCl}_3$ , 100 MHz,  $\delta$ ): 162.8, 157.1, 156.8, 154.3, 144.7, 140.6, 139.0, 133.2, 128.9, 127.5, 126.4, 125.0, 124.9, 122.1, 118.2, 116.7, 115.6, 93.8, 44.4 (2C), 23.0. IR  $\nu_{\text{max}}$  (neat): 2998, 1720, 1643, 1421, 1215, 835, 720  $\text{cm}^{-1}$ . HRMS (EI)  $m/z$ :  $[\text{M}^+]$  calcd for  $\text{C}_{21}\text{H}_{17}\text{NO}_3$ , 331.1208; found, 331.1202.

#### Procedure for preparation of compound 12.

To a stirred solution of imine **1** (103 mg, 0.5 mmol) and triethylamine (101 mg, 1.5 mmol) in dry toluene (3 mL) was added acid chloride **5k** (131 mg, 0.55 mmol) at 0 °C. The resulting mixture was stirred at room temperature for 1 h and then stirred at 60 °C for another 1 h. After completion of the reaction, the reaction mixture was diluted with ethyl acetate (100 mL). The organic phase was washed with 5 N HCl (30 mL), water (30 mL), brine (30 mL), dried over anhydrous  $\text{MgSO}_4$ , filtered and evaporated under reduced pressure to provide the crude product. The crude product was further purified by column chromatography to obtain the desired compound.

### Ethyl 9,10-dimethoxy-4-oxo-2-phenyl-3,4,6,7-tetrahydro-2H-pyrido[2,1-*a*]isoquinoline-3-carboxylate (12).

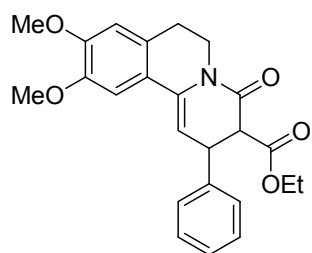

Yellow liquid.  $R_f = 0.4$  (50% EtOAc/hexanes). 78 mg. Yield 38%.  $^1\text{H}$  NMR ( $\text{CDCl}_3$ , 400 MHz)  $\delta$ : 7.36–7.25 (m, 5H), 7.03 (s, 1H), 6.72 (s, 1H), 5.71 (d,  $J = 4.0$  Hz, 1H), 4.28 (dd,  $J = 10.8, 4.0$  Hz, 1H), 4.21–4.08 (m, 3H), 3.89 (s, 3H), 3.86 (s, 3H), 3.79–3.73 (m, 1H), 3.70 (d,  $J = 10.8$  Hz, 1H), 2.86–2.82 (m, 2H), 1.13 (t,  $J = 7.2$  Hz, 3H).  $^{13}\text{C}\{^1\text{H}\}$  NMR ( $\text{CDCl}_3$ , 100 MHz)  $\delta$ : 169.1, 165.4, 149.7, 148.3, 141.0, 135.1, 128.9 (2C), 127.7 (2C), 127.6, 127.4, 121.4, 110.8, 106.9, 103.6, 61.4, 56.1, 56.0, 55.7, 40.9, 39.0, 28.7, 14.0. IR  $\nu_{\text{max}}$  (neat): 2939, 1716, 1649, 1565, 1425, 1217, 845, 650  $\text{cm}^{-1}$ . HRMS (EI)  $m/z$ :  $[\text{M}^+]$  calcd for  $\text{C}_{24}\text{H}_{25}\text{NO}_5$ , 407.1733; found, 407.1730.

#### Procedure E for preparation of compounds 19a–b.

To a stirred solution of imine **1** (2.0 eq) and triethylamine (3.0 eq) in dry toluene (5 mL) was added furmaroyl chloride **18** (1.0 eq) at 0 °C. The resulting mixture was stirred at room temperature for 2 h. After completion of the reaction, toluene was evaporated and the crude compound was diluted with dichloromethane (200 mL). The organic phase was washed with 5 N HCl (50 mL), water (50 mL), brine (50 mL), dried over anhydrous  $\text{MgSO}_4$ , filtered and

evaporated under reduced pressure to provide the crude product. The crude product was further purified by column chromatography to obtain the desired compound.

**5,6,14,15-tetrahydrodiisoquinolino[2,1-b:2',1'-g][2,6]naphthyridine-8,17-dione (19a).**

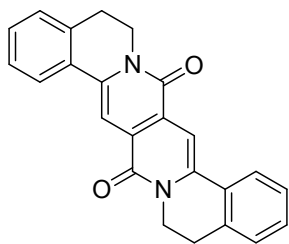

The title compound **19a** was synthesized following general procedure E from imine **1a** (1.0 g, 6.89 mmol), triethylamine (1.1 g, 10.33 mmol), and fumaroyl chloride (**18**, 527 mg, 3.44 mmol), and purified by flash column chromatography (0.5% MeOH in DCM) to give a blue solid (970 mg. Yield 77%).  $R_f = 0.5$  (50% EtOAc/hexanes). mp 314–316 °C.  $^1\text{H}$  NMR ( $\text{CDCl}_3$ , 400 MHz)  $\delta$ : 7.83–7.79 (m, 2H), 7.37–7.32 (m, 4H), 7.28–7.25 (m, 4H), 3.85 (t,  $J = 6.4$  Hz, 4H), 3.06 (t,  $J = 6.4$  Hz, 4H).  $^{13}\text{C}\{^1\text{H}\}$  NMR ( $\text{CDCl}_3$ , 100 MHz)  $\delta$ : 169.4, 145.1, 135.0, 130.4, 129.9, 128.7, 127.4, 126.5, 125.8, 97.7, 36.4, 28.8. IR  $\nu_{\text{max}}$  (neat): 2948, 1732, 1655, 1570, 1420, 1217, 815, 757  $\text{cm}^{-1}$ . HRMS (EI)  $m/z$ :  $[\text{M}^+]$  calcd for  $\text{C}_{24}\text{H}_{18}\text{N}_2\text{O}_6$ , 366.1368; found, 366.1365.

**2,3,11,12-Tetramethoxy-5,6,14,15-tetrahydrodiisoquinolino[2,1-b:2',1'-g][2,6]naphthyridine-8,17-dione (19b).**

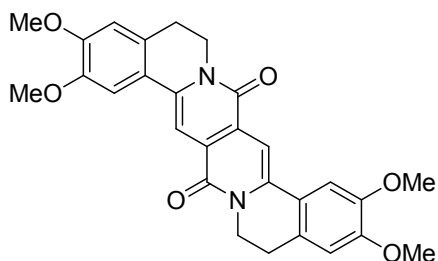

The title compound **19b** was synthesized following general procedure E from imine **1b** (103 mg, 0.5 mmol), triethylamine (76 mg, 0.75 mmol), and fumaroyl chloride (**18**, 38 mg, 0.25 mmol), and purified by flash column chromatography (1% MeOH in DCM) to give a blue solid (154 mg. Yield 63%).  $R_f = 0.5$  (80% EtOAc/hexanes). mp 310–312 °C.  $^1\text{H}$  NMR ( $\text{CDCl}_3$ , 400 MHz)  $\delta$ : 7.21 (s, 2H), 7.17 (s, 2H), 6.73 (s, 2H), 3.96 (s, 6H), 3.93 (s, 6H), 3.83 (t,  $J = 6.4$  Hz, 4H), 3.00 (t,  $J = 6.4$  Hz, 4H).  $^{13}\text{C}\{^1\text{H}\}$  NMR ( $\text{CDCl}_3$ , 100 MHz)  $\delta$ : 169.9, 151.4, 148.8, 144.5, 129.3, 129.0, 119.2, 111.2, 107.6, 96.5, 56.4, 56.2, 36.6, 28.5. IR  $\nu_{\text{max}}$  (neat): 2955, 1720, 1652, 1569, 1425, 1211, 810, 777  $\text{cm}^{-1}$ . HRMS (EI)  $m/z$ :  $[\text{M}^+]$  calcd for  $\text{C}_{28}\text{H}_{26}\text{N}_2\text{O}_6$ , 486.1791; found, 486.1786.

<sup>1</sup>HNMR of compound **4a** (CDCl<sub>3</sub>)

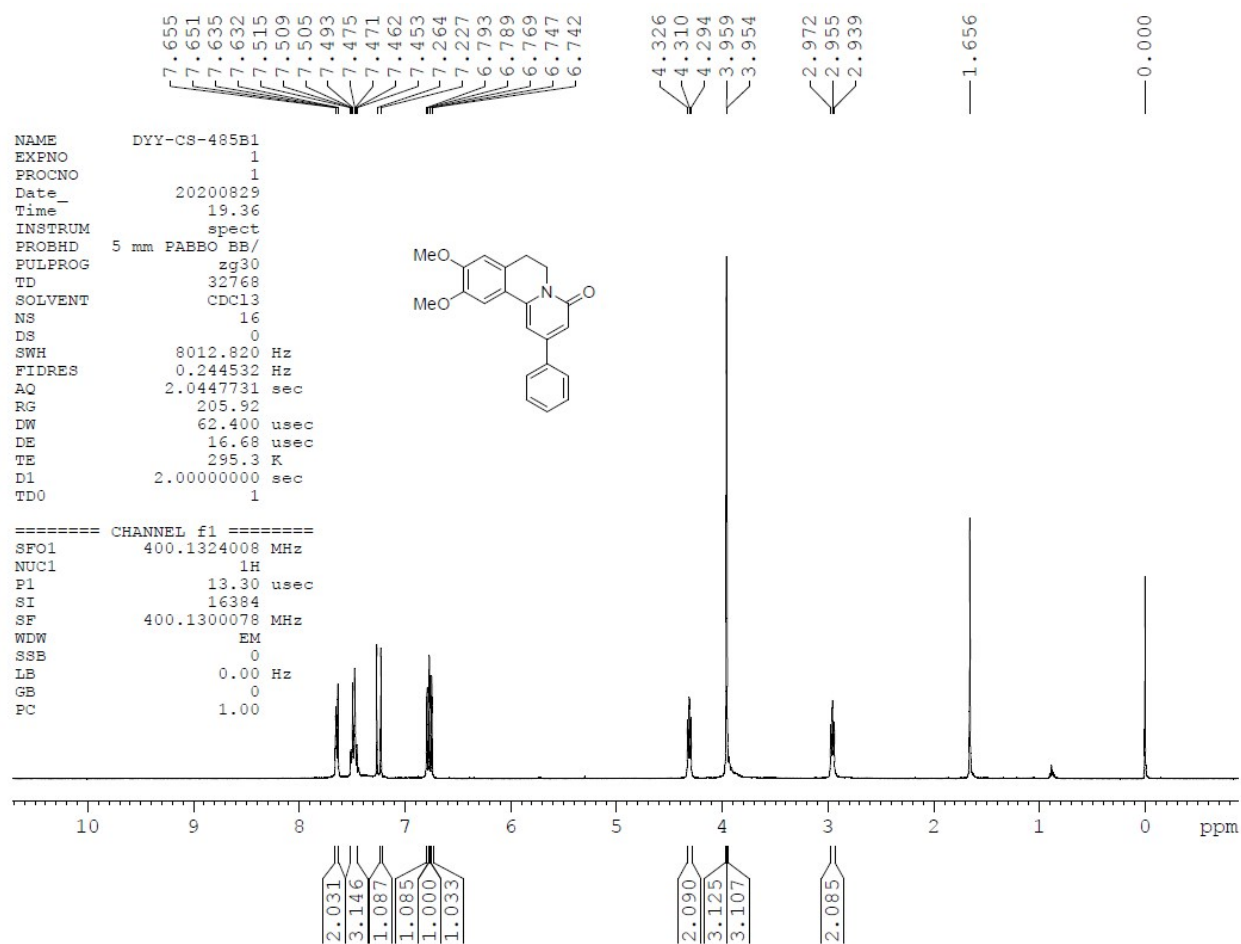

<sup>13</sup>C NMR of compound **4a** (CDCl<sub>3</sub>)

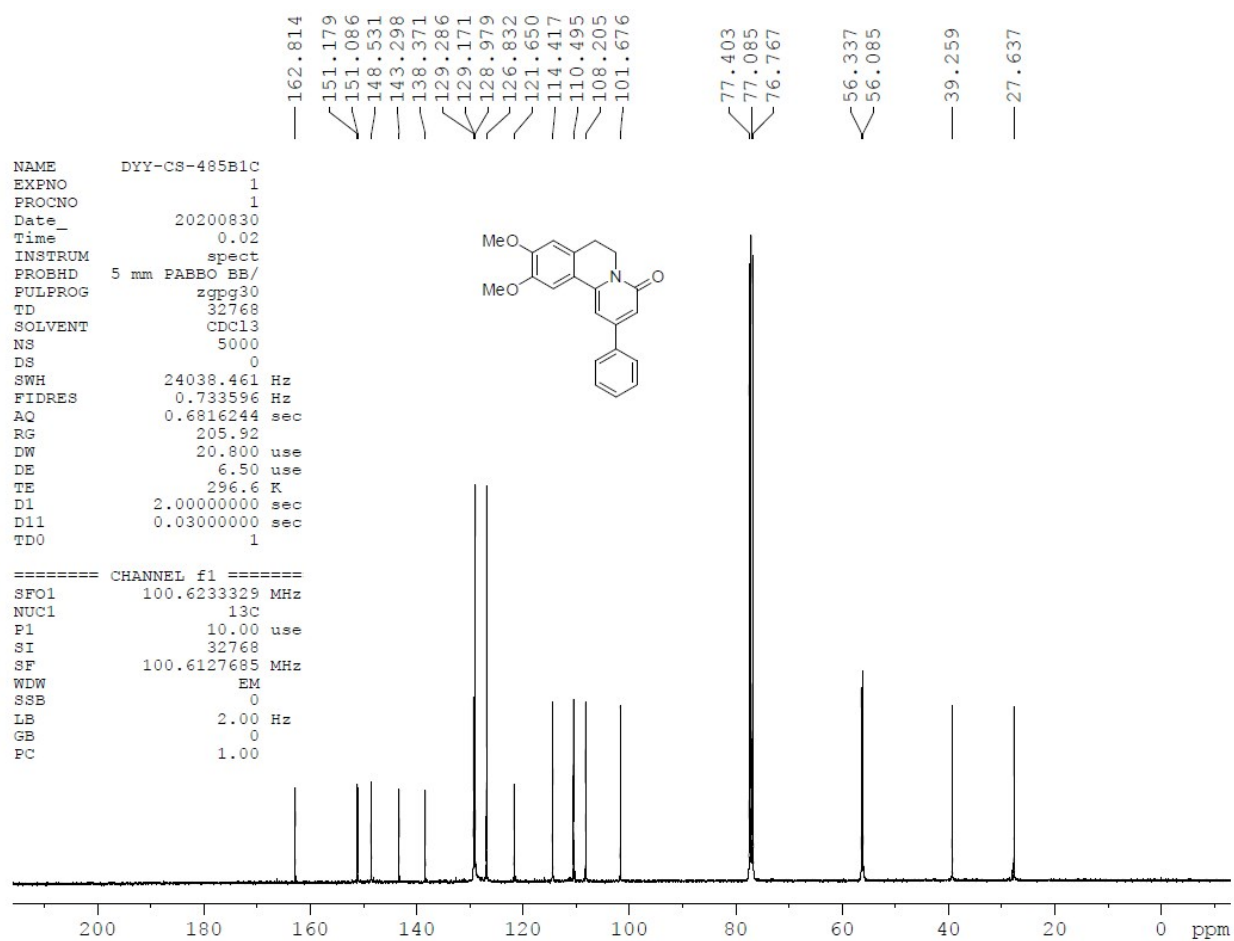

<sup>1</sup>HNMR of compound **6a** (CDCl<sub>3</sub>)

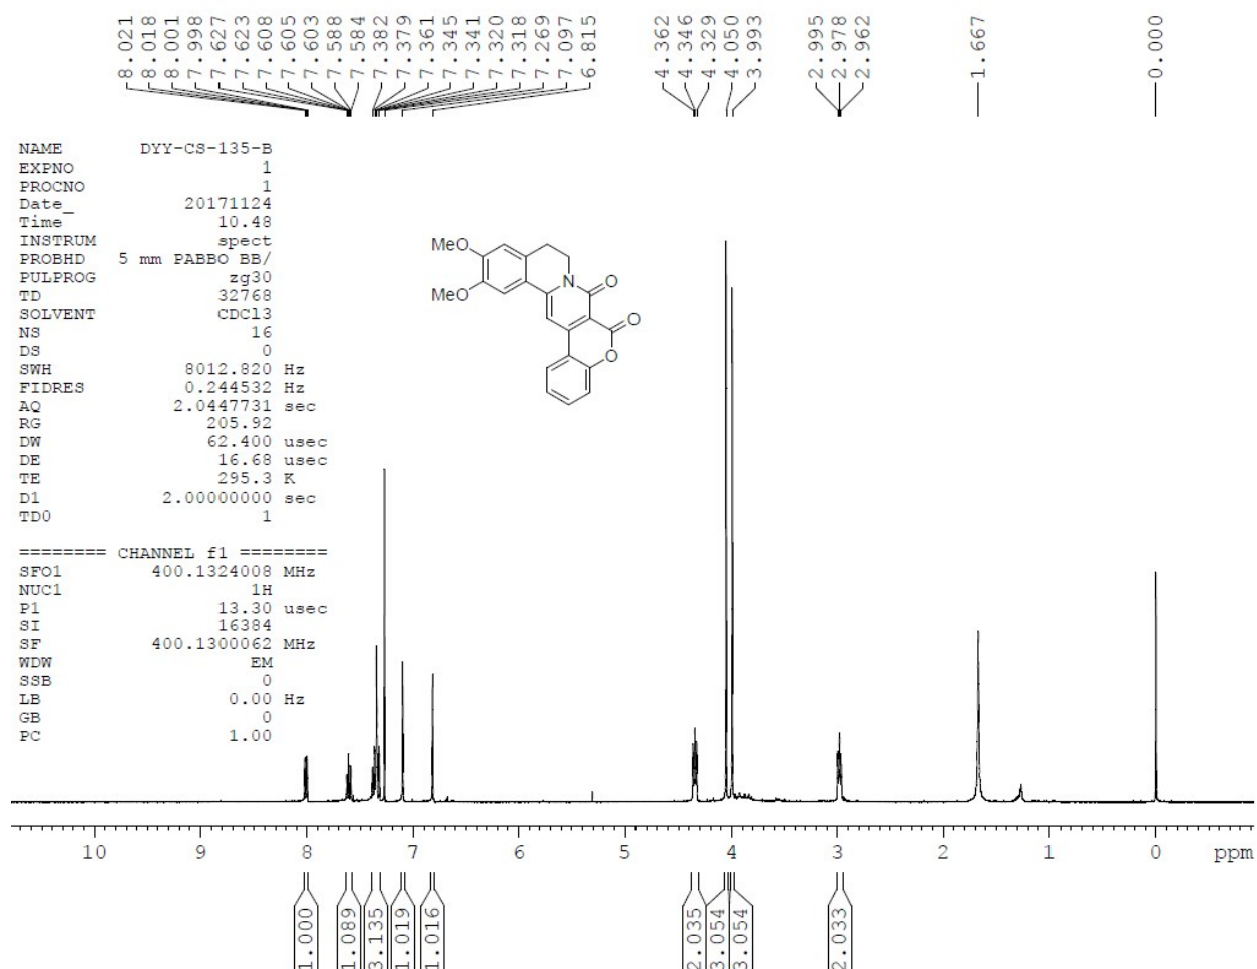

<sup>13</sup>C NMR of compound **6a** (CDCl<sub>3</sub>)

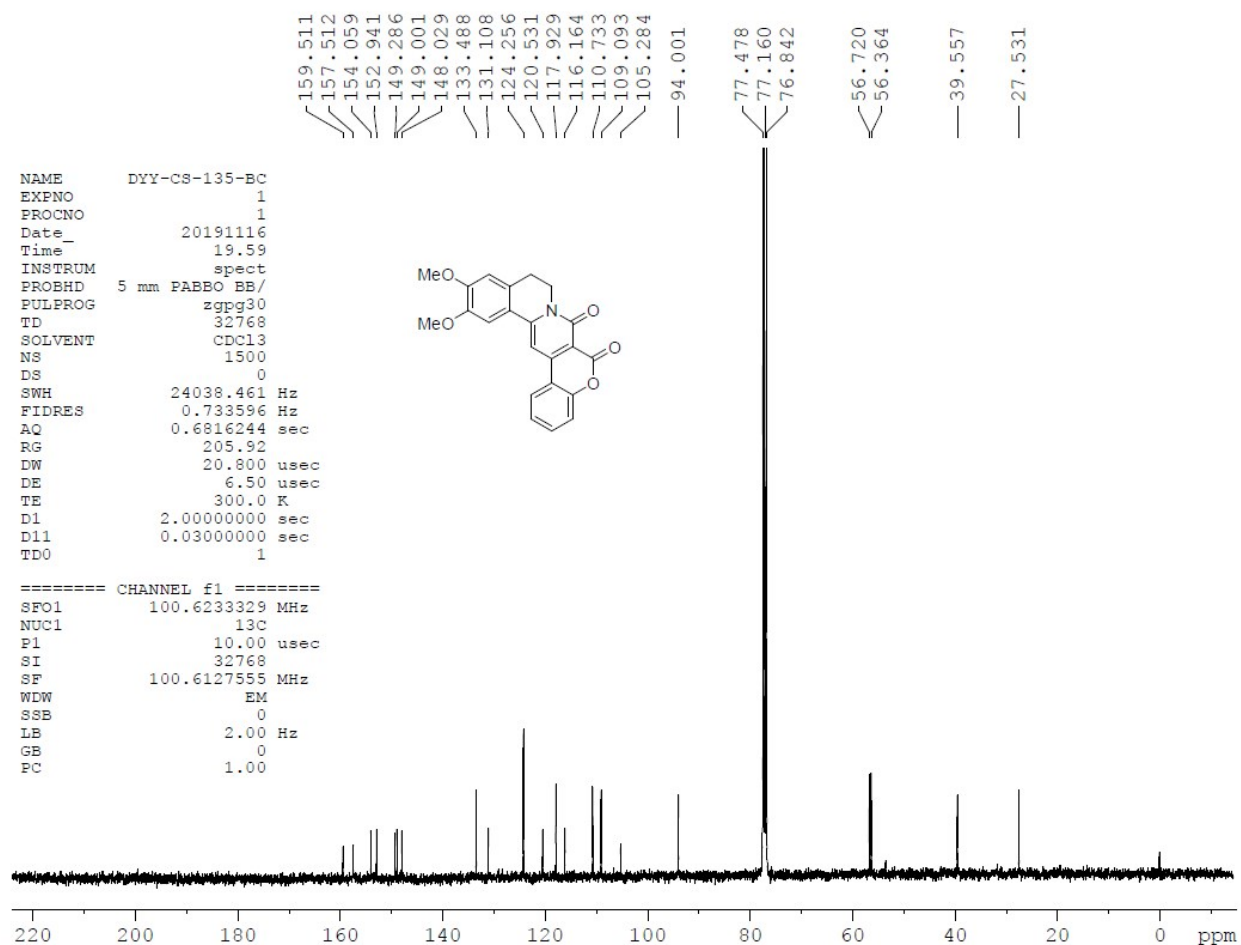

<sup>1</sup>H NMR of compound **6b** (CDCl<sub>3</sub>)

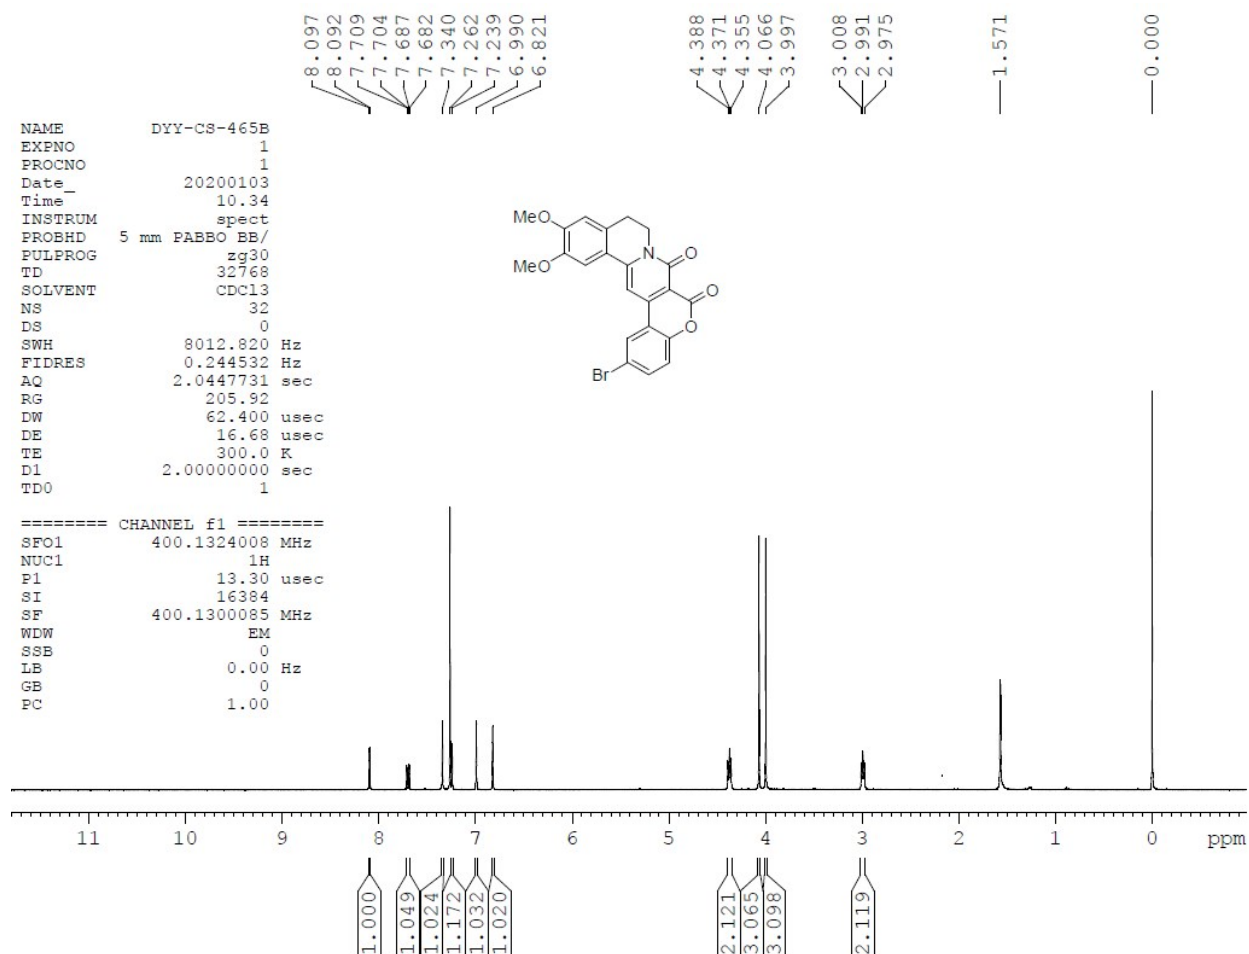

<sup>13</sup>C NMR of compound **6b** (CDCl<sub>3</sub>)

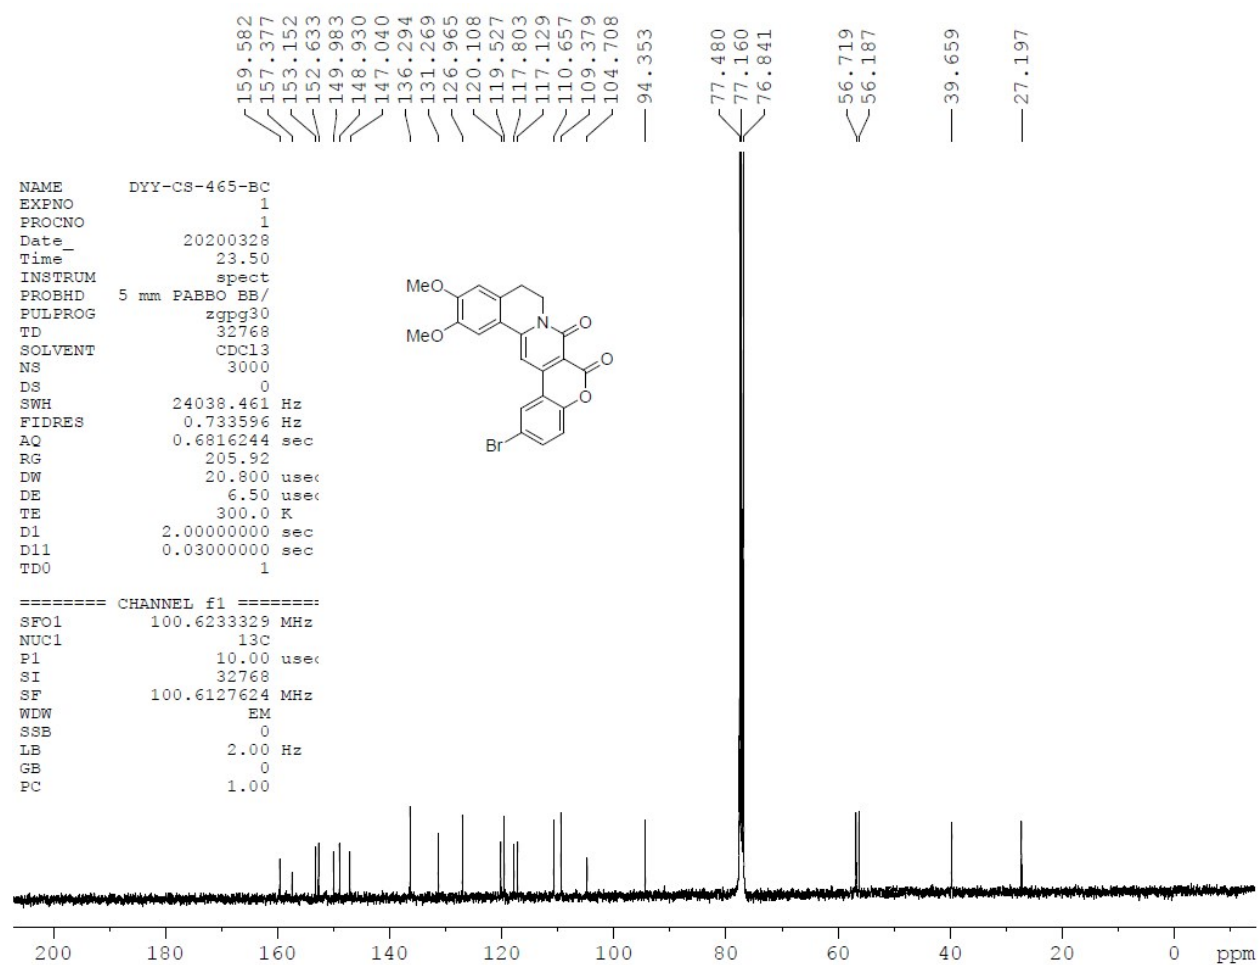

<sup>1</sup>H NMR of compound **6c** (CDCl<sub>3</sub>)

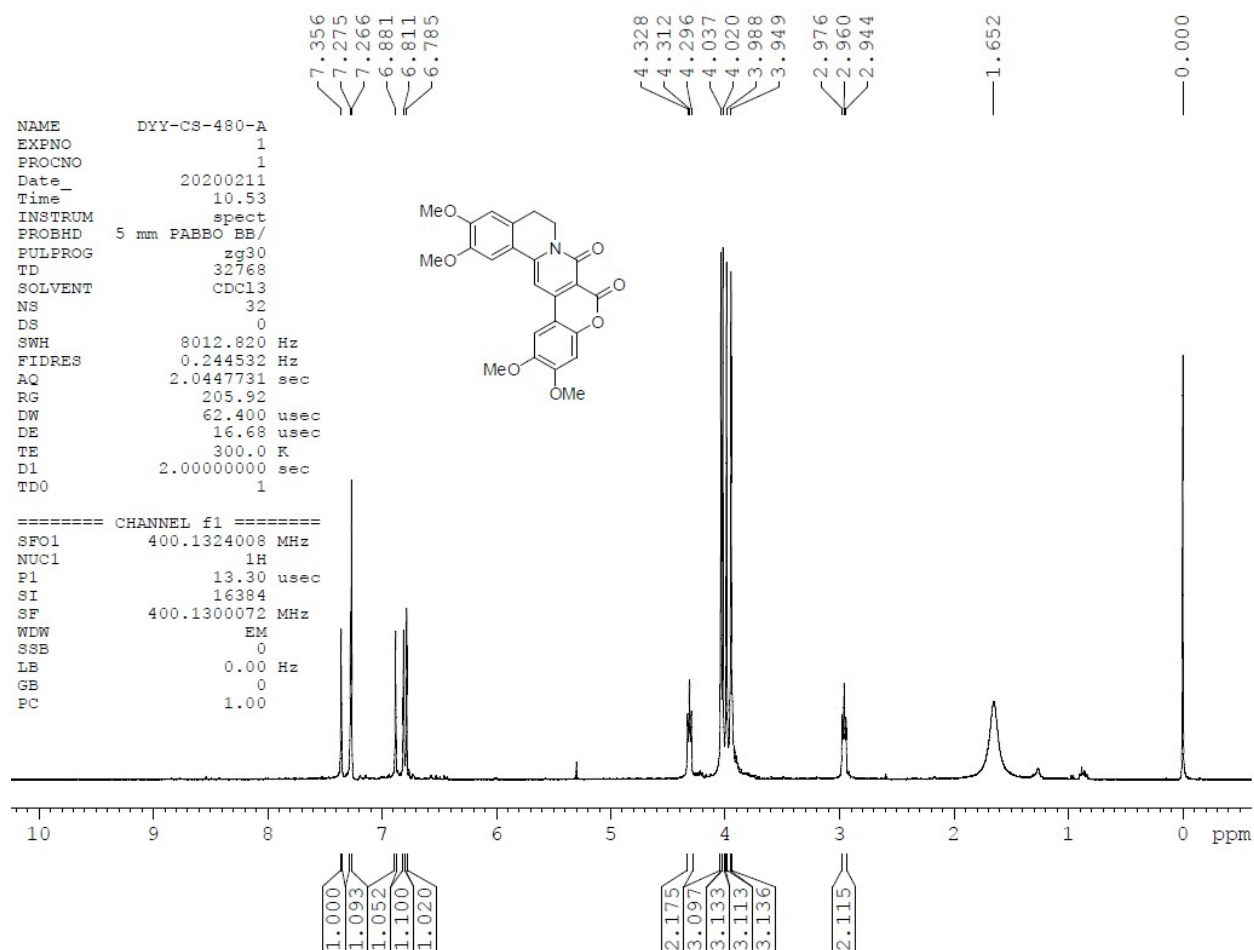

$^{13}\text{C}$  NMR of compound **6c** ( $\text{CDCl}_3$ )

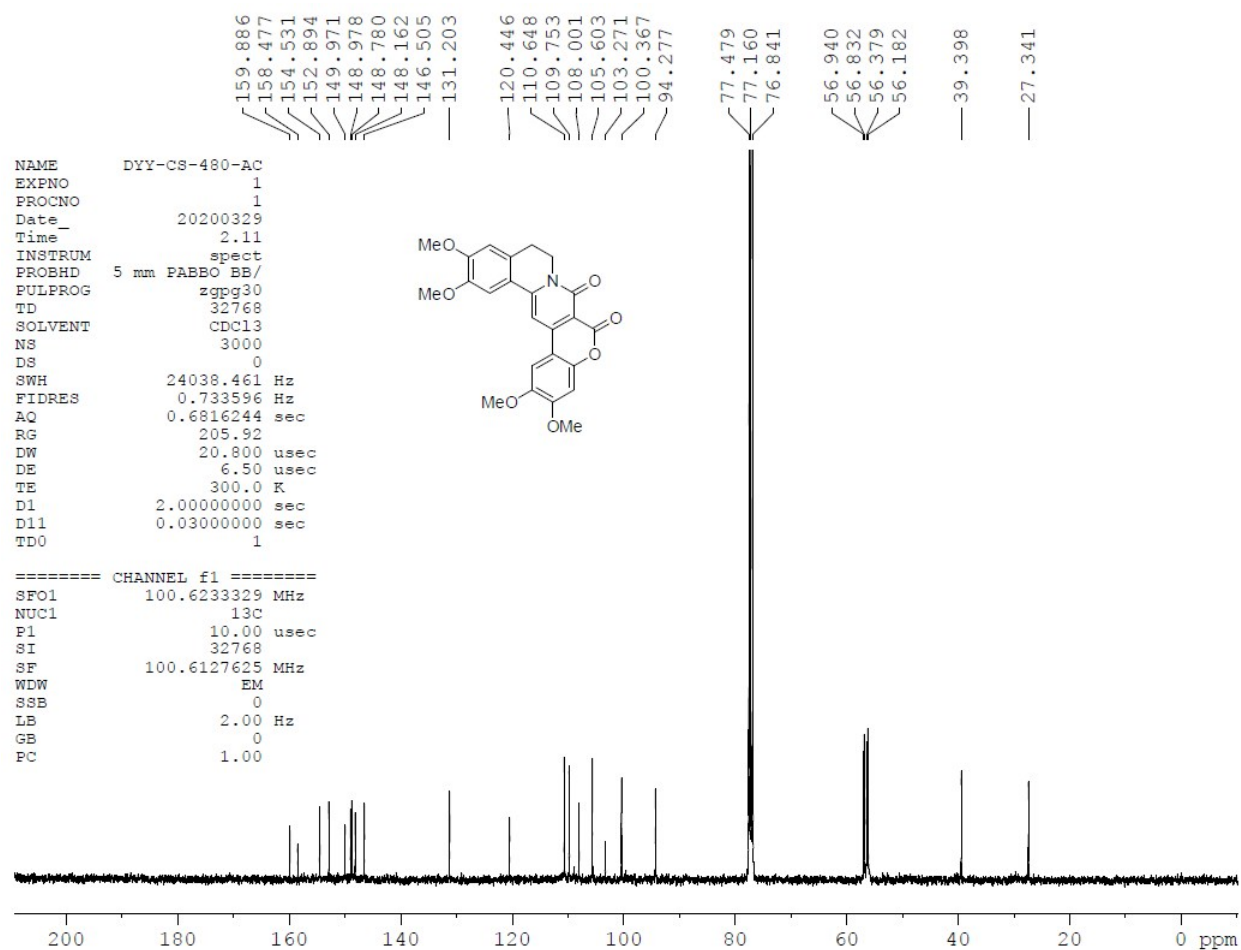

<sup>1</sup>H NMR of compound **6d** (CD<sub>3</sub>OD)

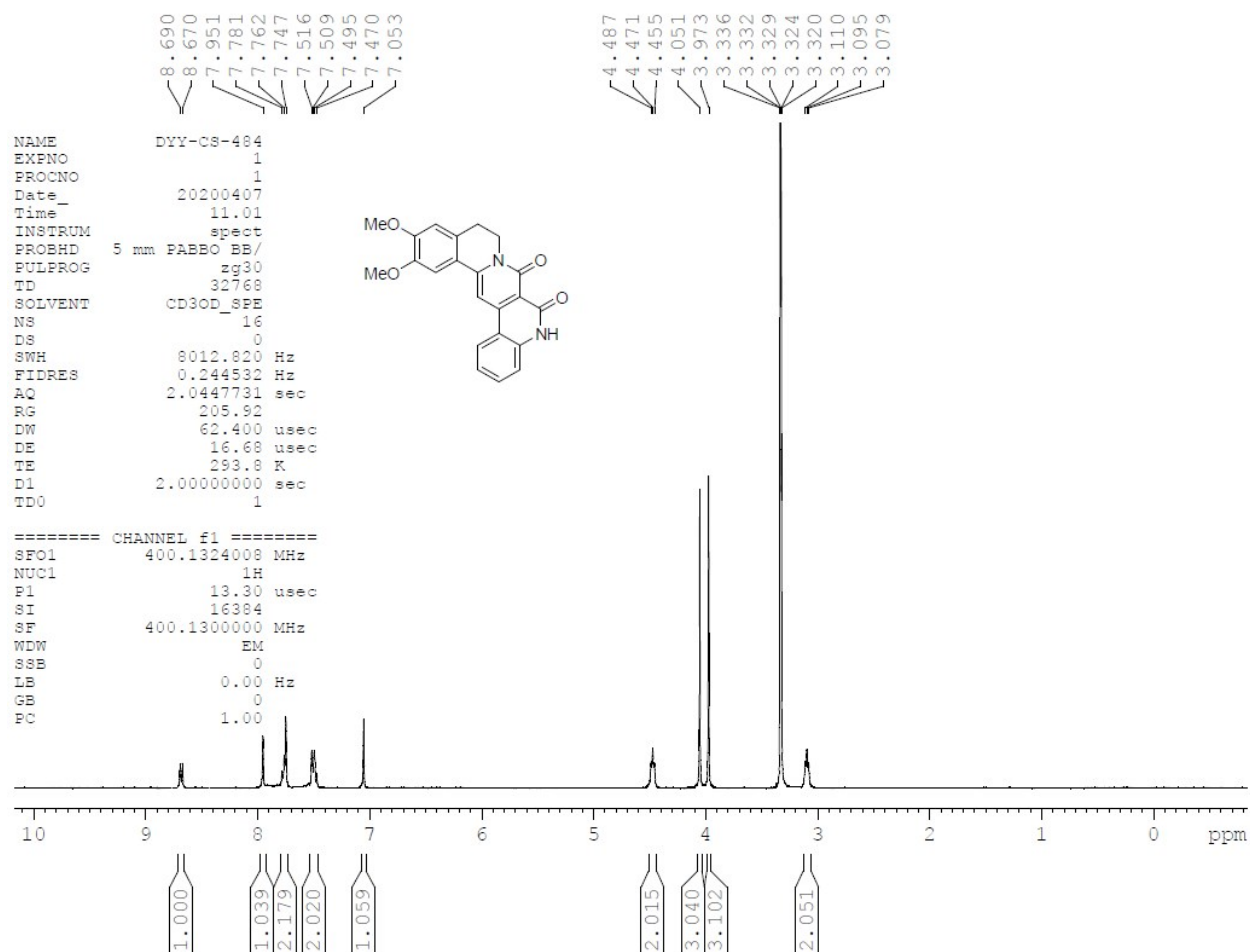

$^{13}\text{C}$  NMR of compound **6d** ( $\text{CD}_3\text{OD}$ )

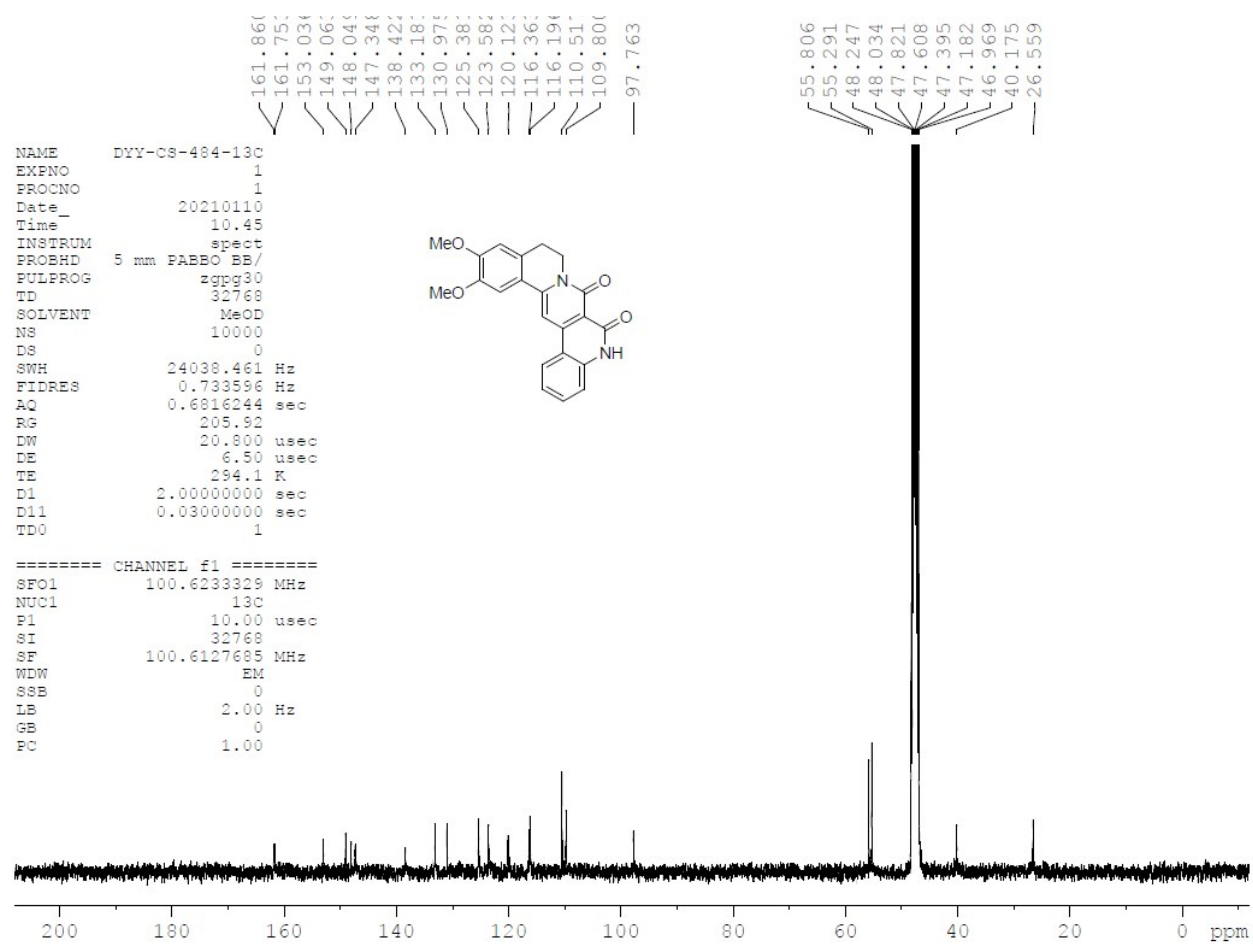

<sup>1</sup>H NMR of compound **6e** (CDCl<sub>3</sub>)

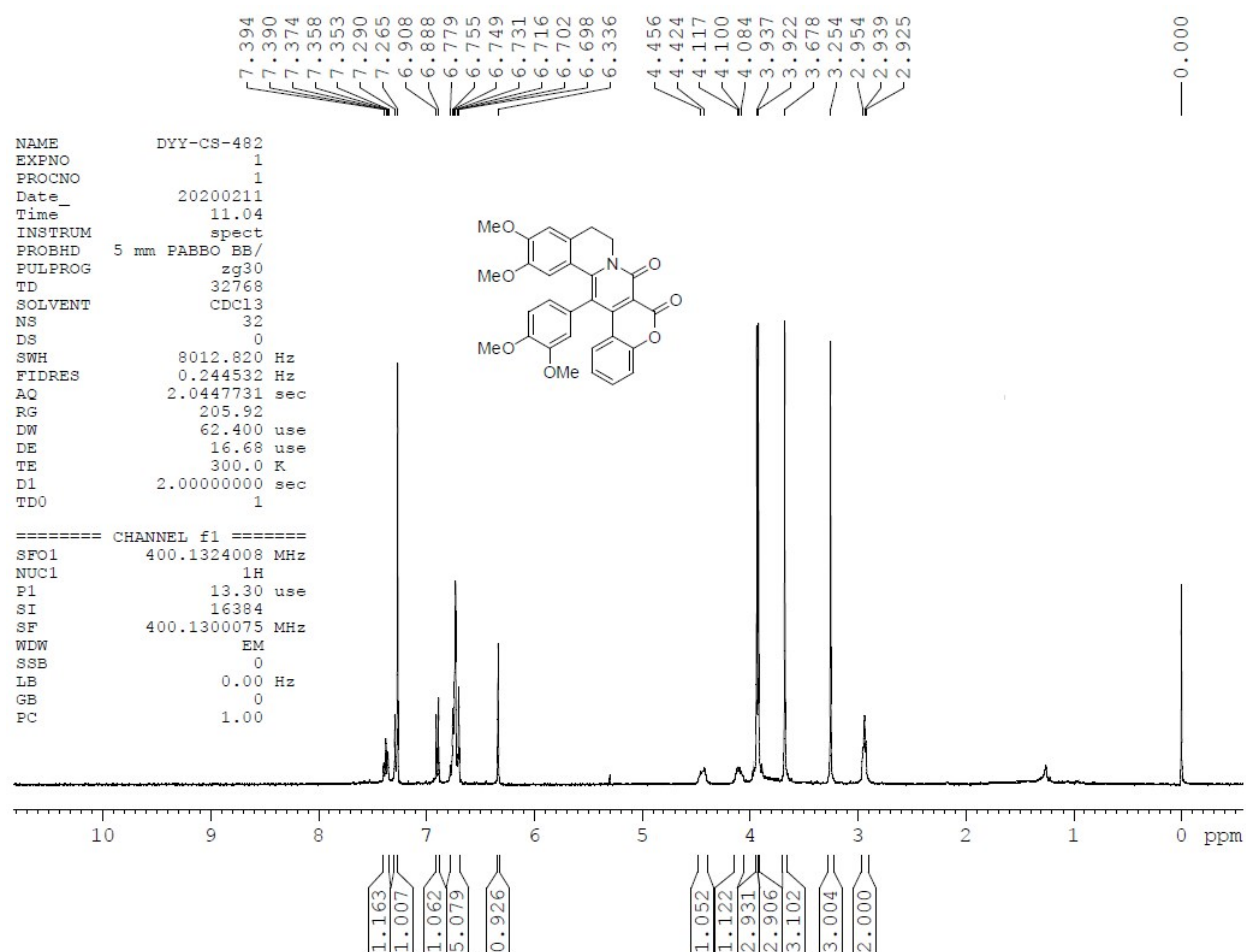

$^{13}\text{C}$  NMR of compound **6e** ( $\text{CDCl}_3$ )

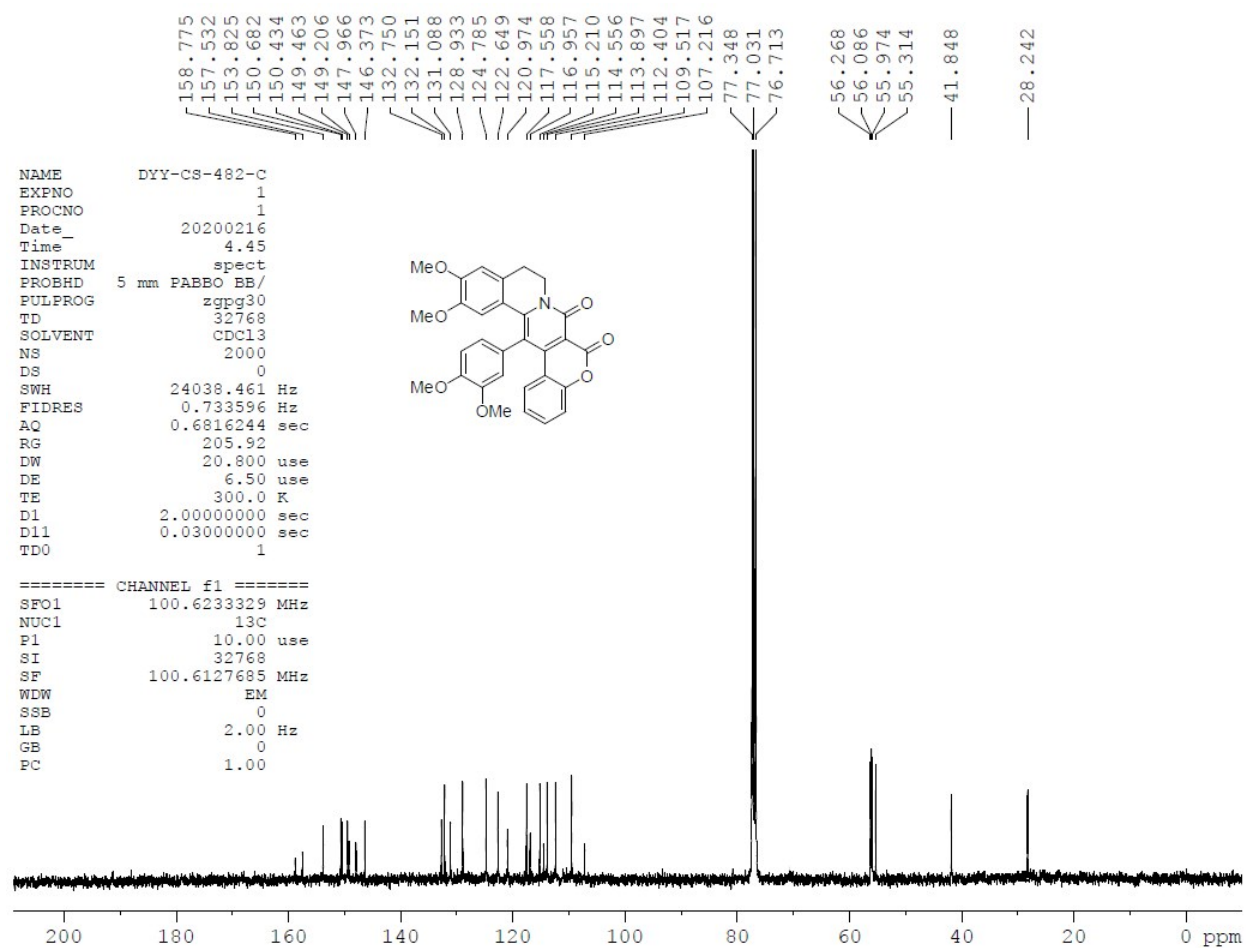

<sup>1</sup>H NMR of compound **6f** (CDCl<sub>3</sub>)

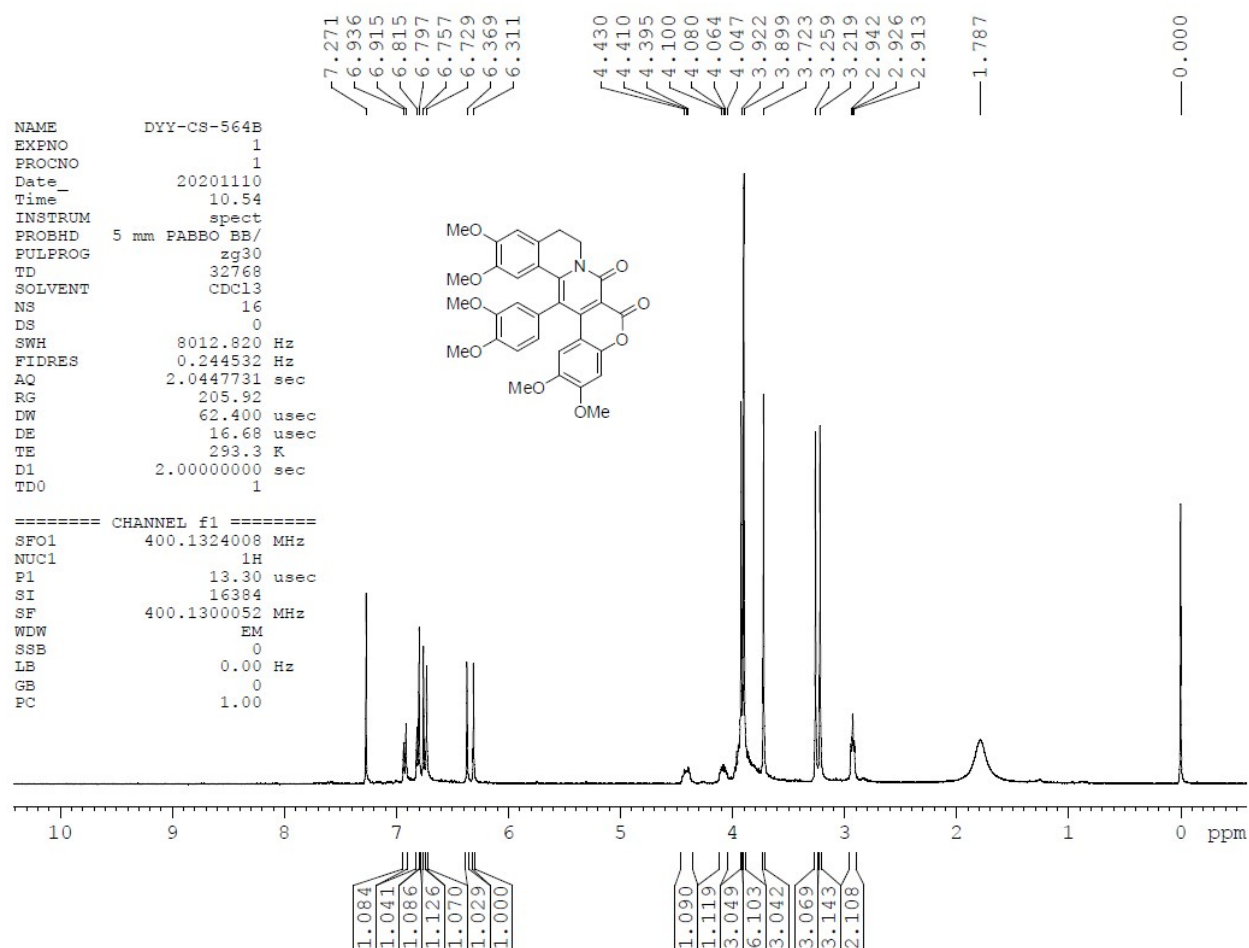

$^{13}\text{C}$  NMR of compound **6f** ( $\text{CDCl}_3$ )

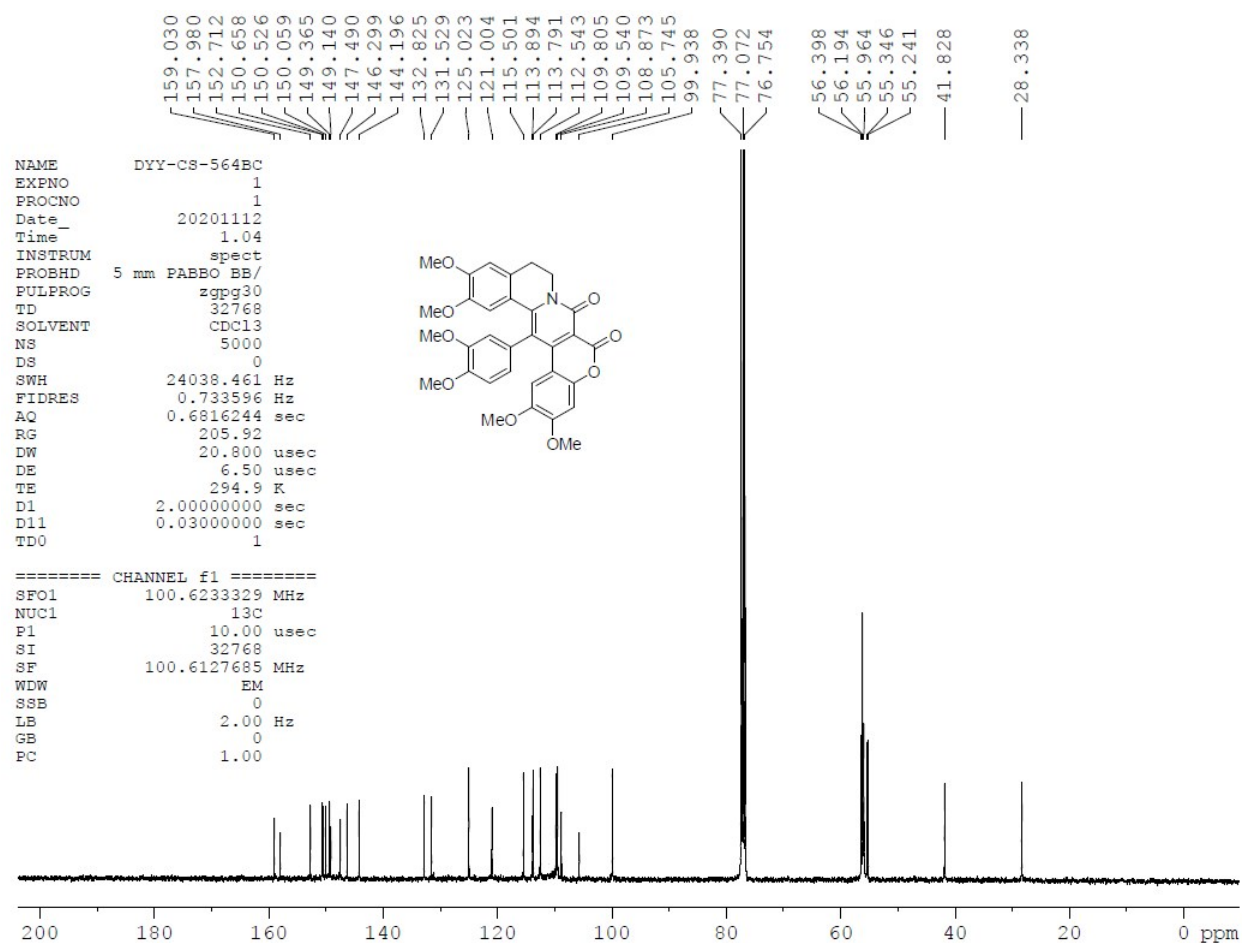

<sup>1</sup>H NMR of compound **6g** (CDCl<sub>3</sub>)

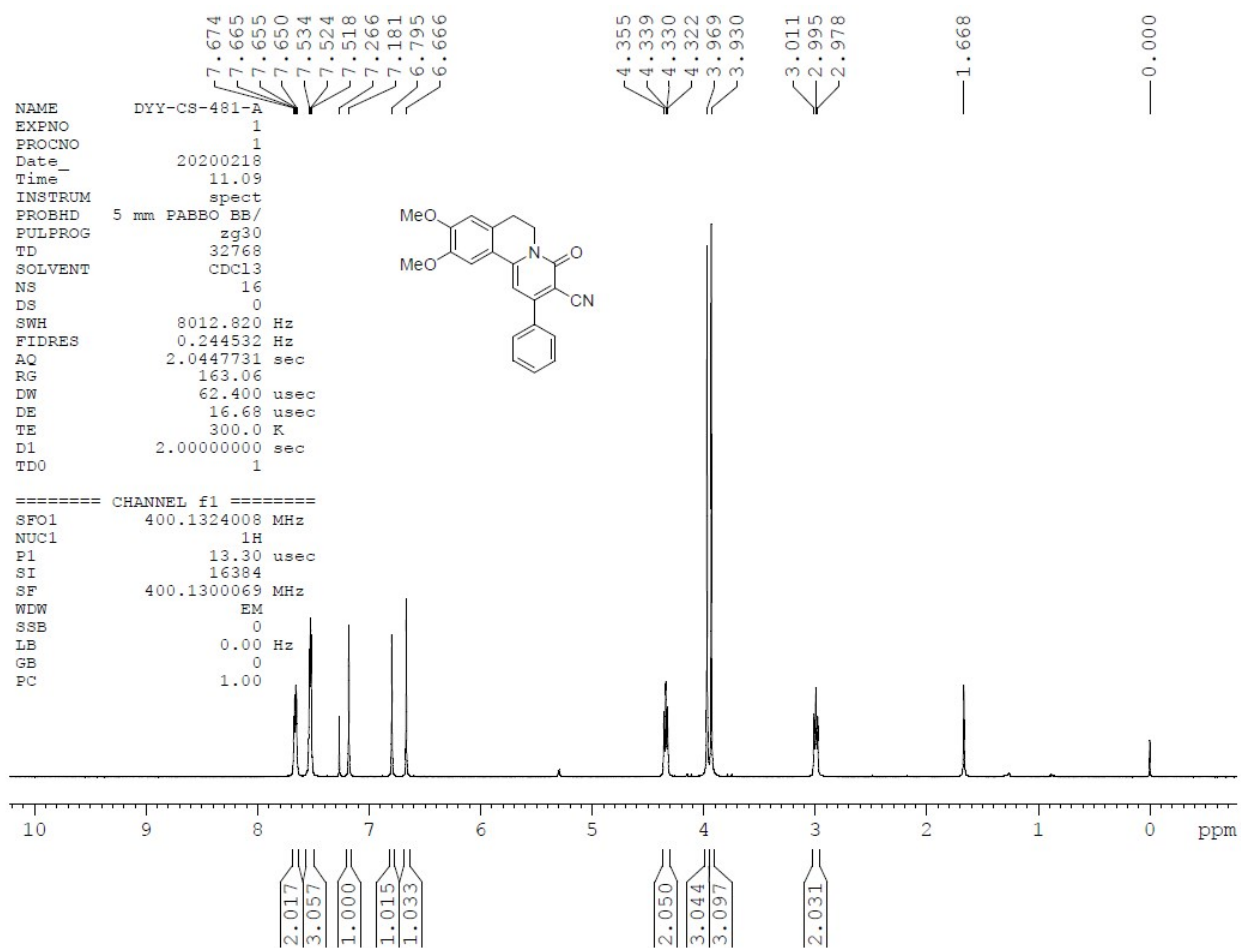

$^{13}\text{C}$  NMR of compound **6g** ( $\text{CDCl}_3$ )

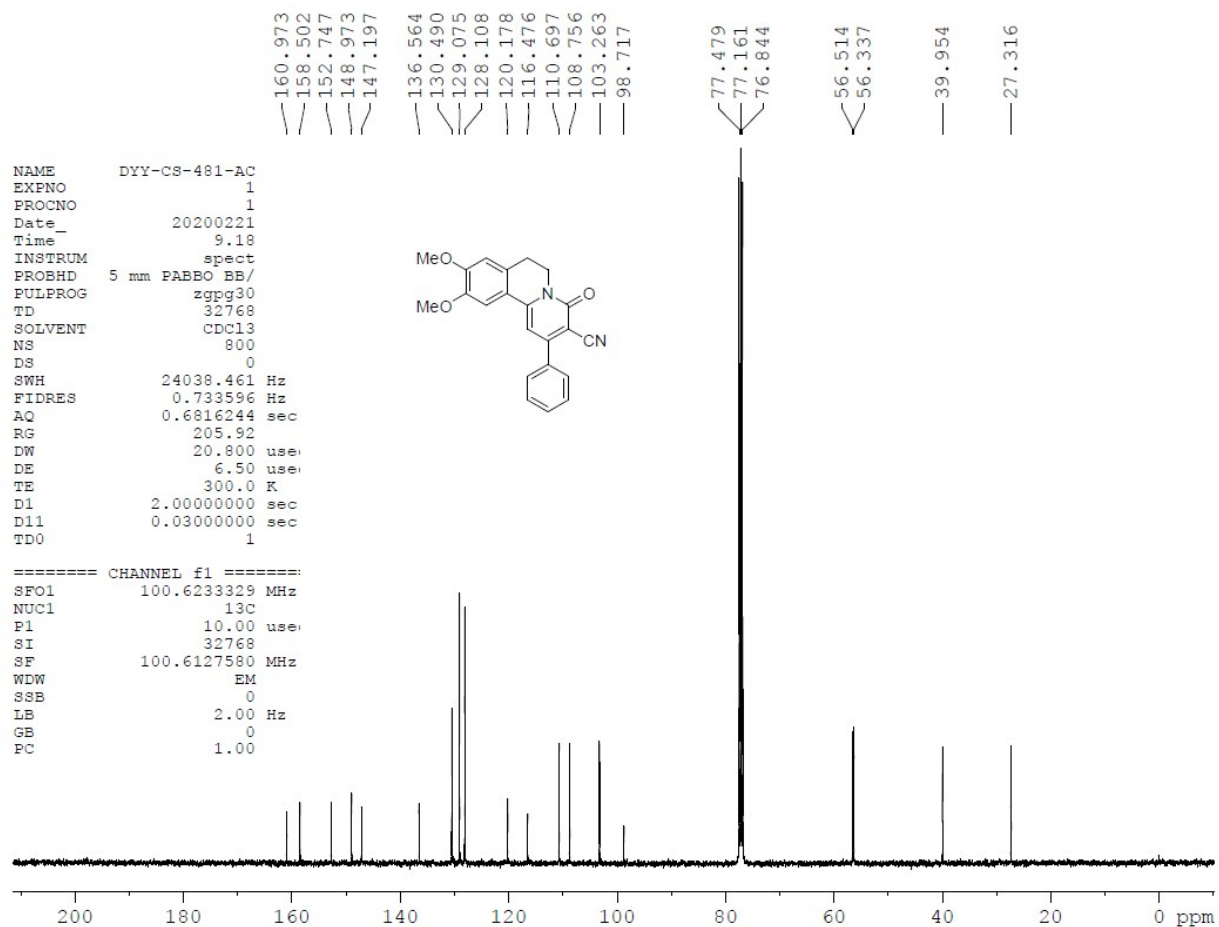

<sup>1</sup>H NMR of compound **6h** (CDCl<sub>3</sub>)

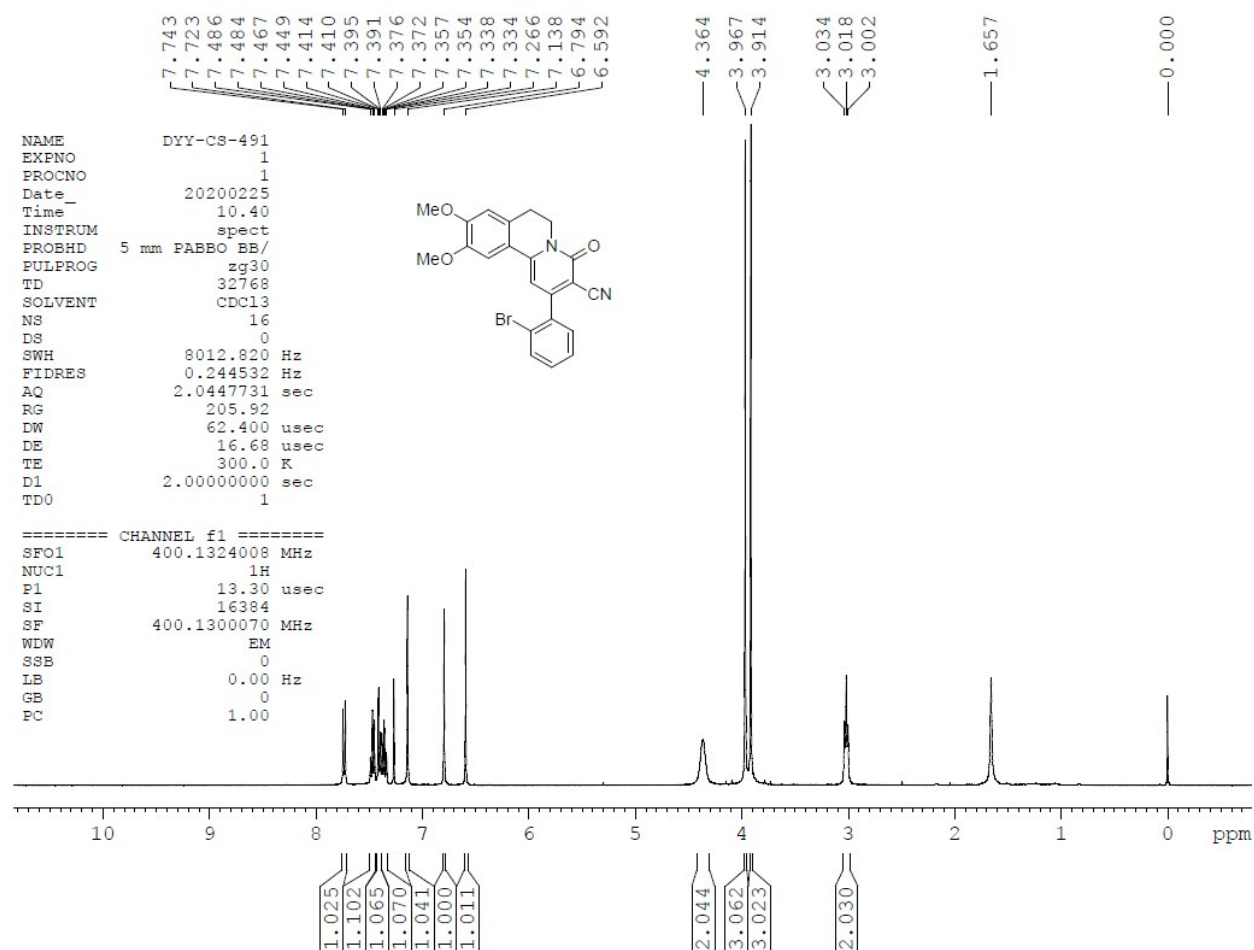

<sup>13</sup>C NMR of compound **6h** (CDCl<sub>3</sub>)

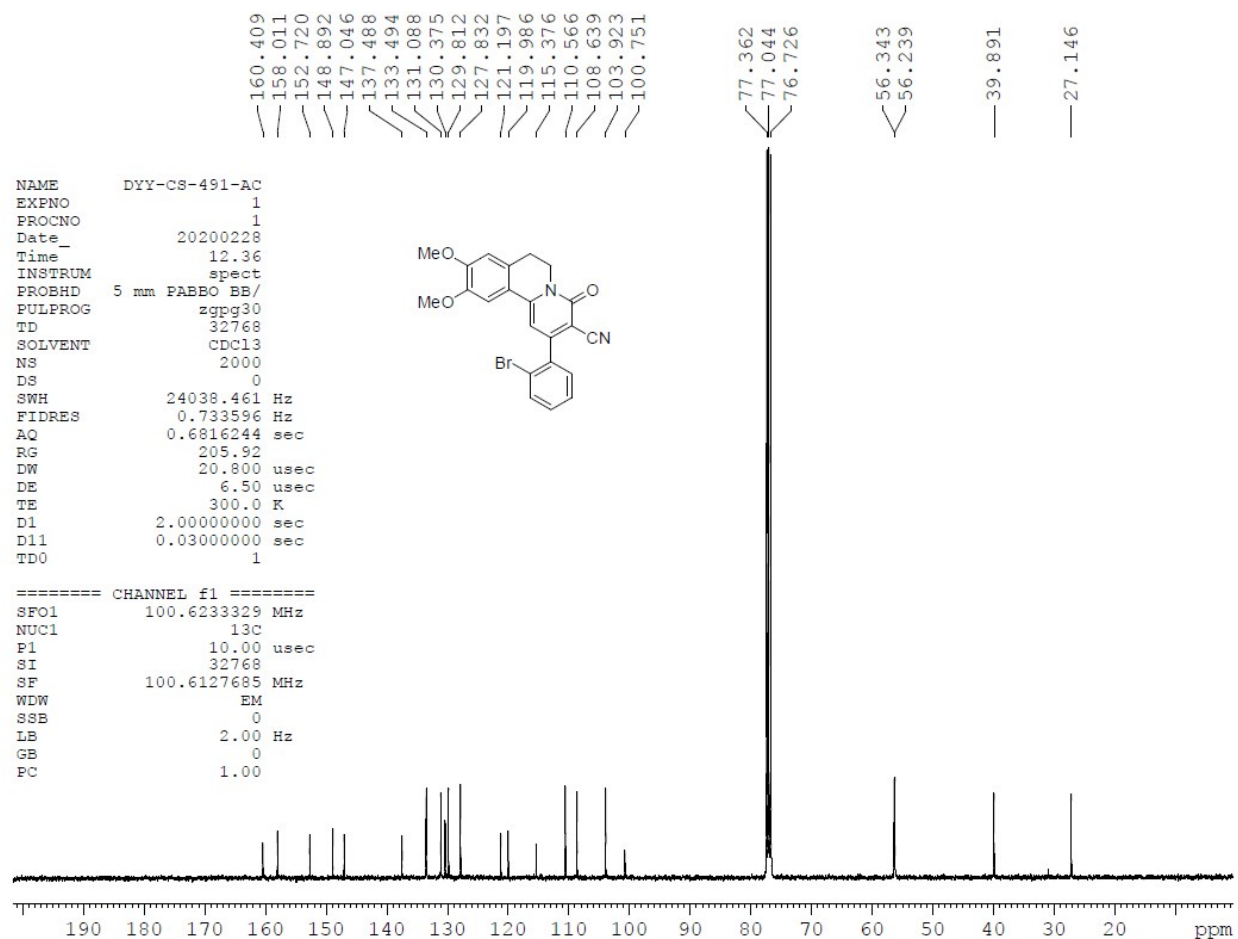

<sup>1</sup>H NMR of compound **6i** (CDCl<sub>3</sub>)

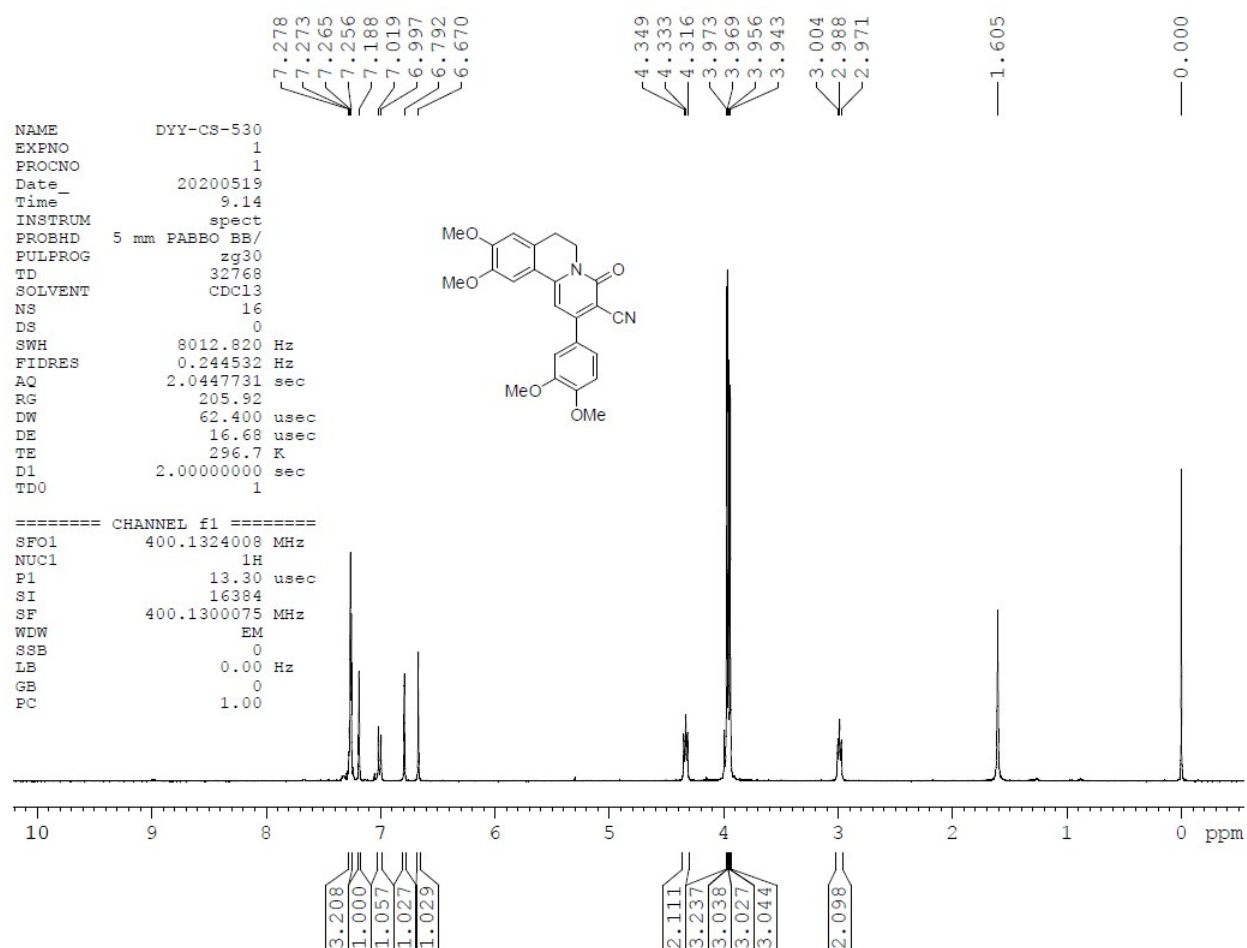

<sup>13</sup>C NMR of compound **6i** (CDCl<sub>3</sub>)

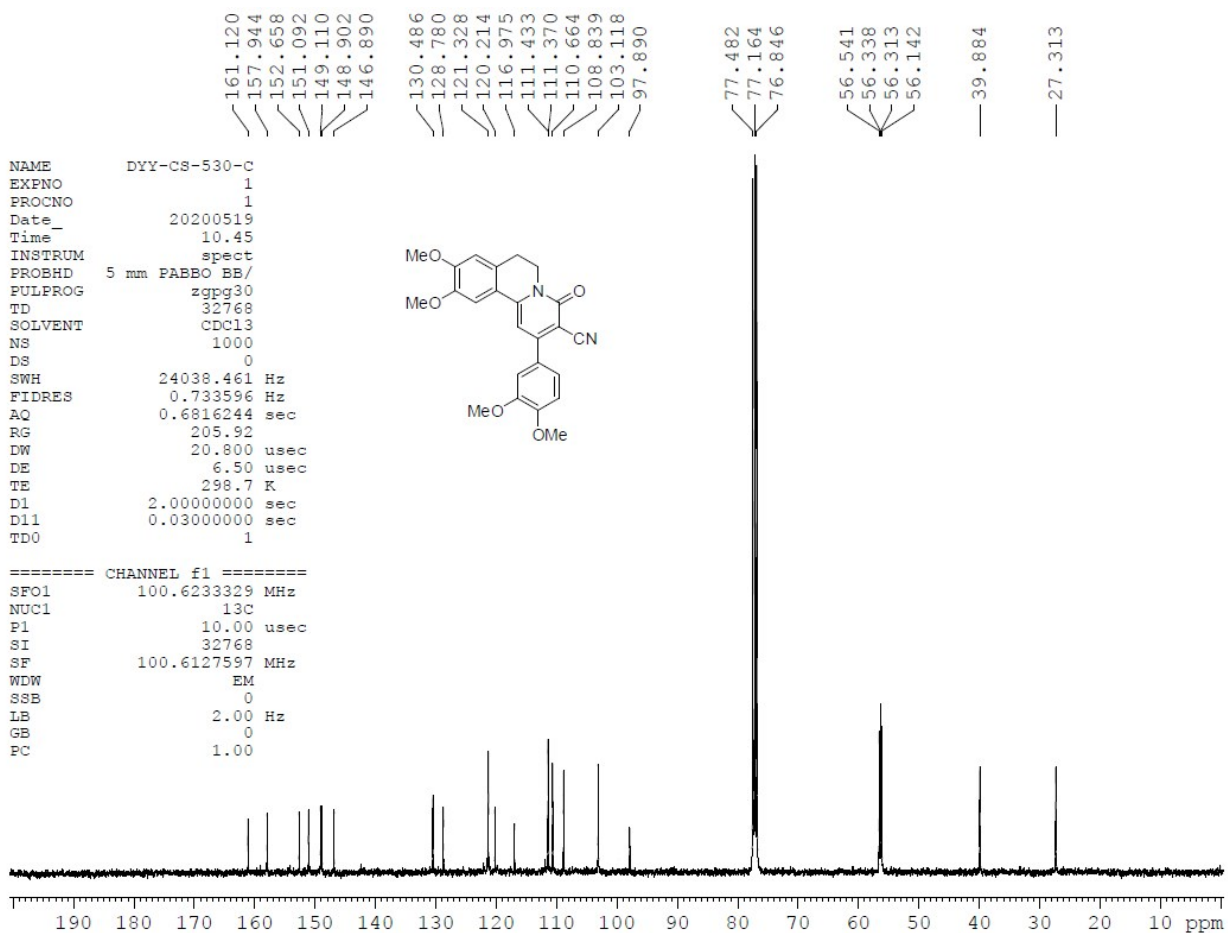

<sup>1</sup>H NMR of compound **6j** (CDCl<sub>3</sub>)

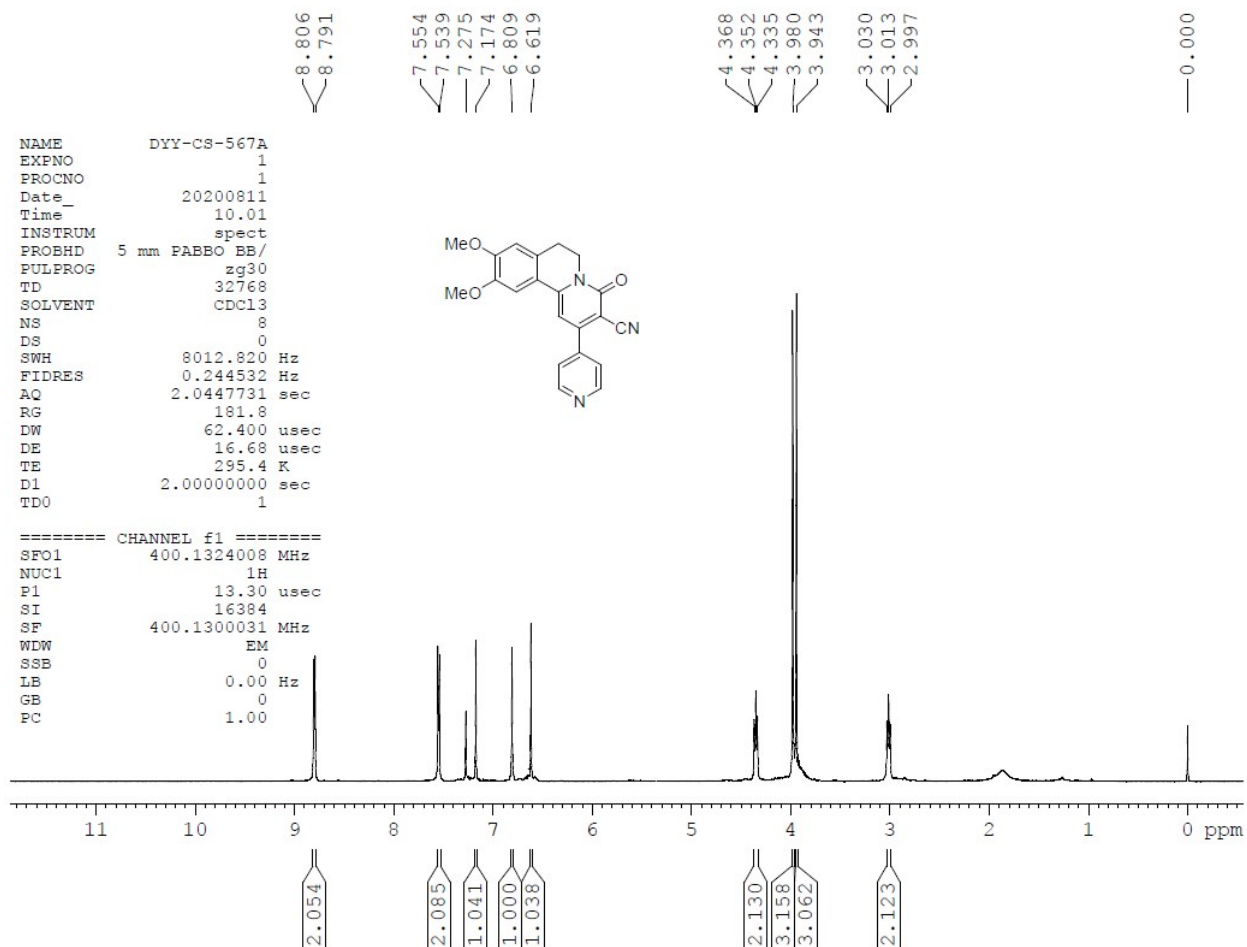

<sup>13</sup>C NMR of compound **6j** (CDCl<sub>3</sub>)

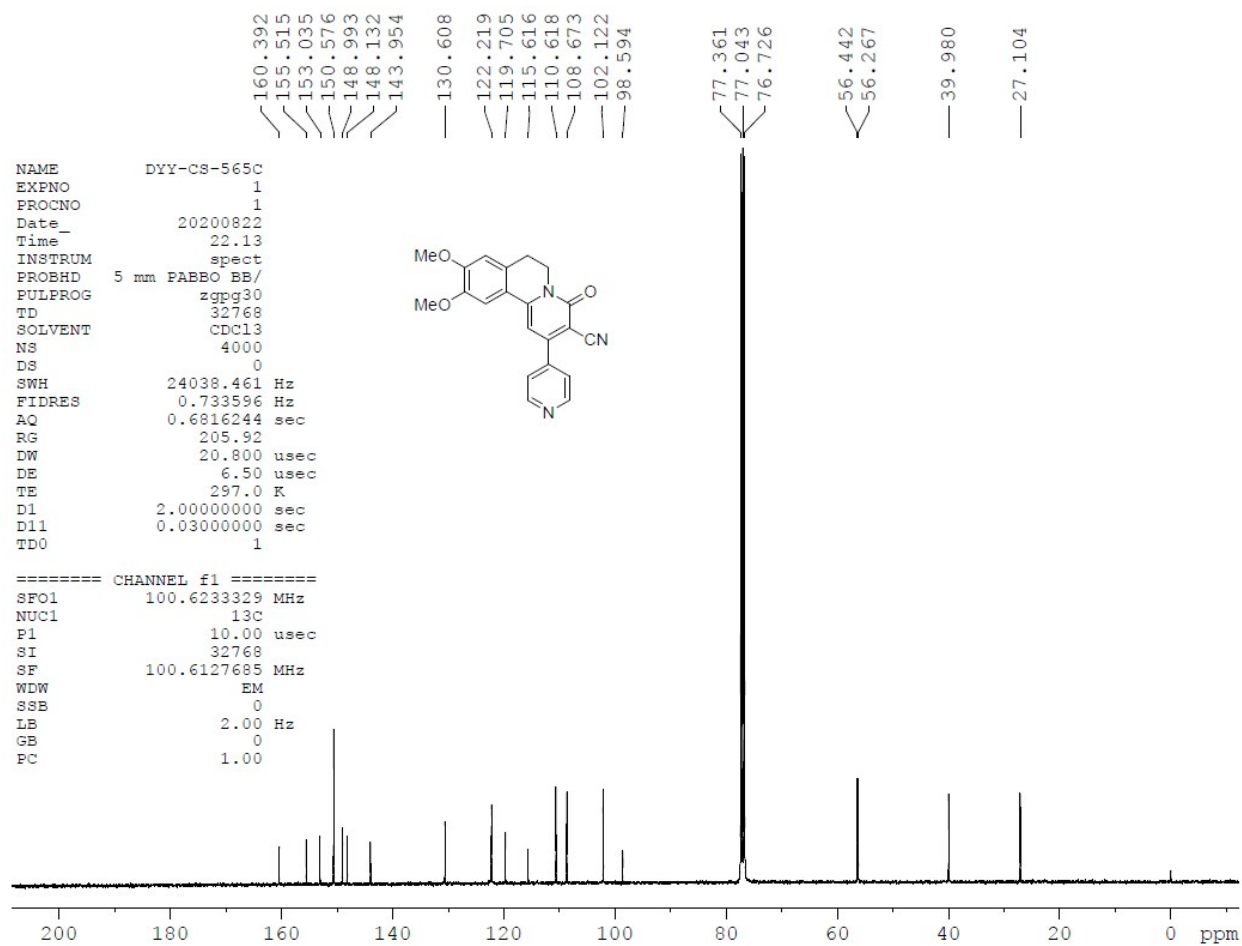

<sup>1</sup>H NMR of compound **6k** (CDCl<sub>3</sub>)

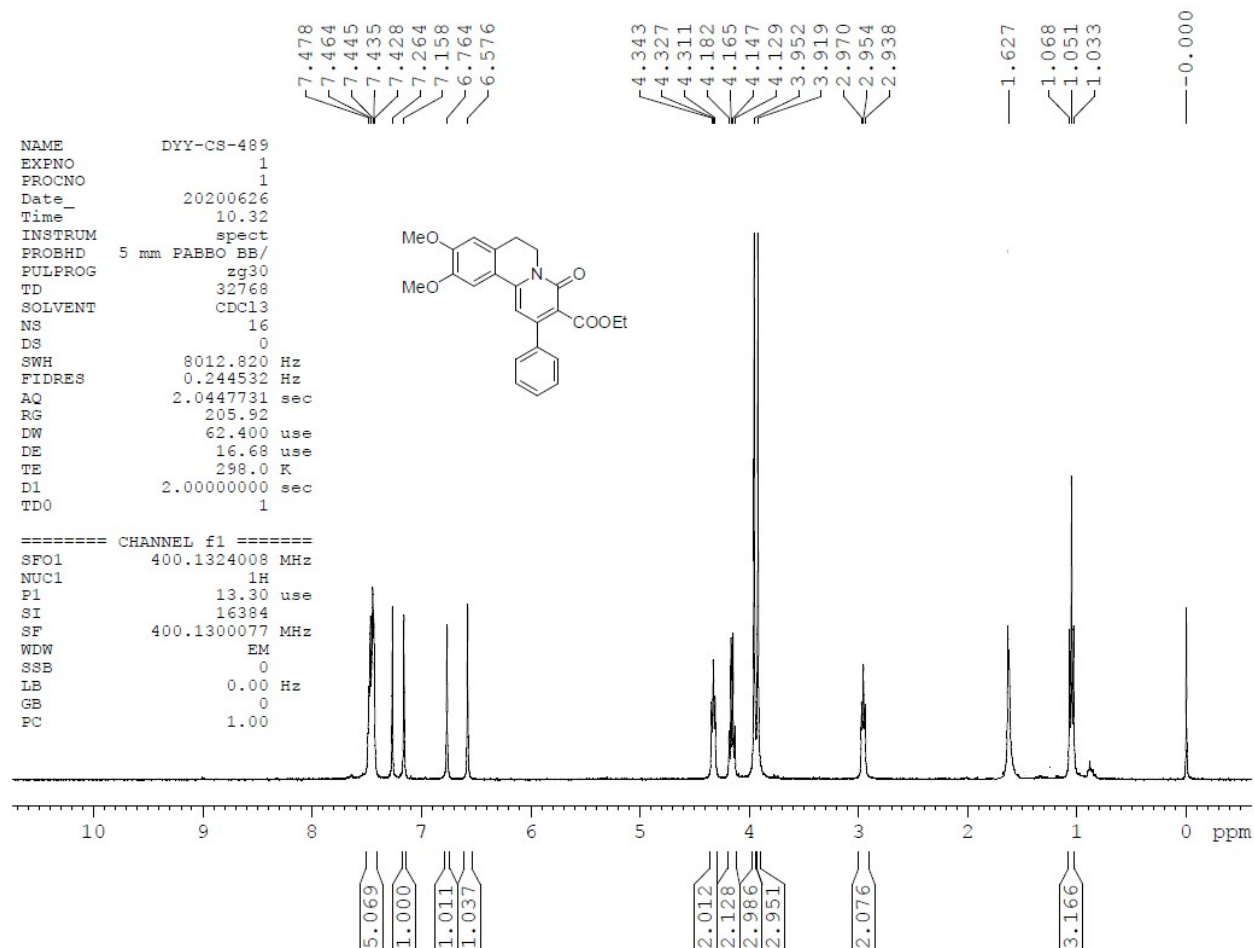

<sup>13</sup>C NMR of compound **6k** (CDCl<sub>3</sub>)

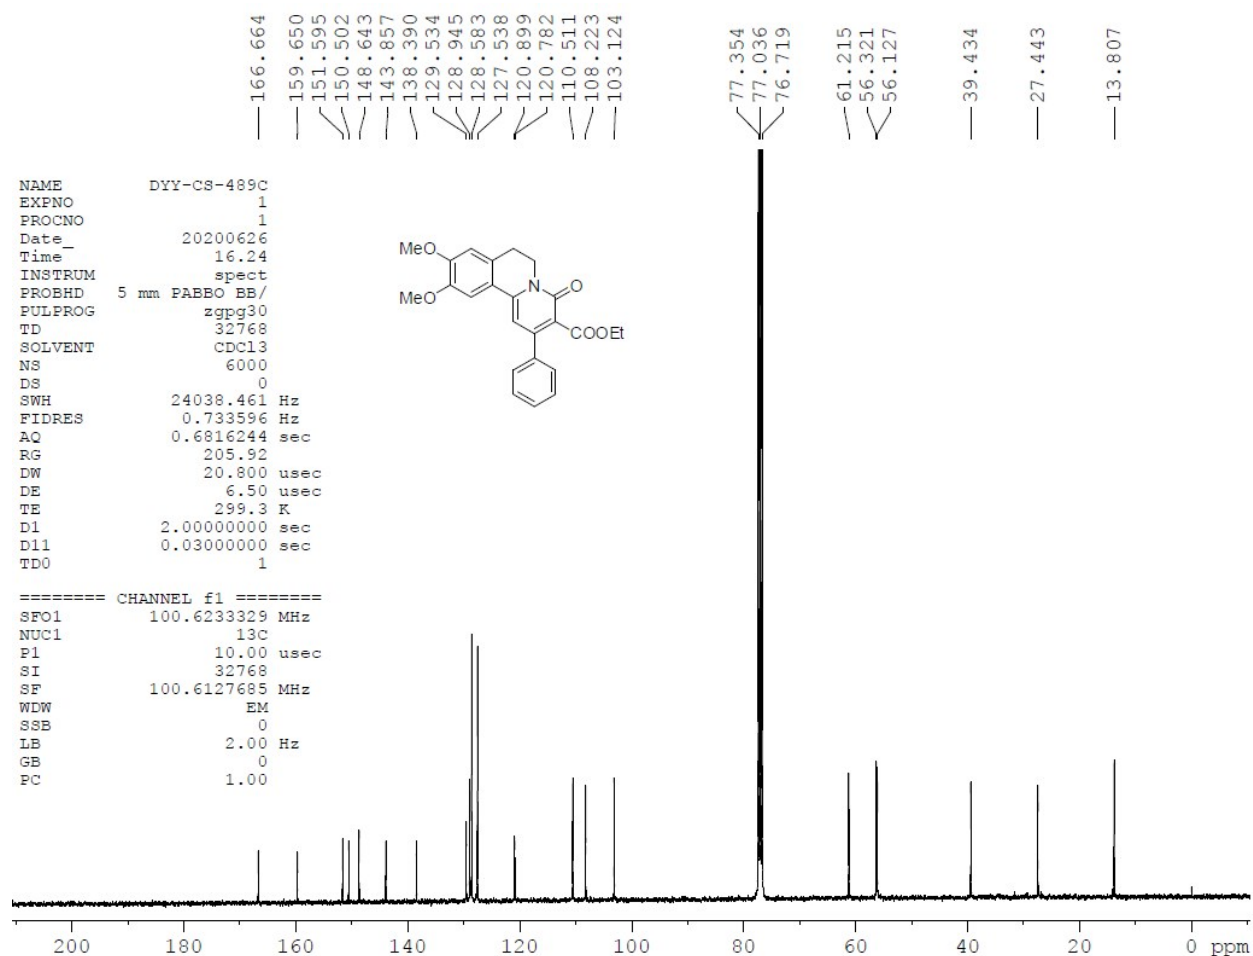

<sup>1</sup>H NMR of compound **6l** (CDCl<sub>3</sub>)

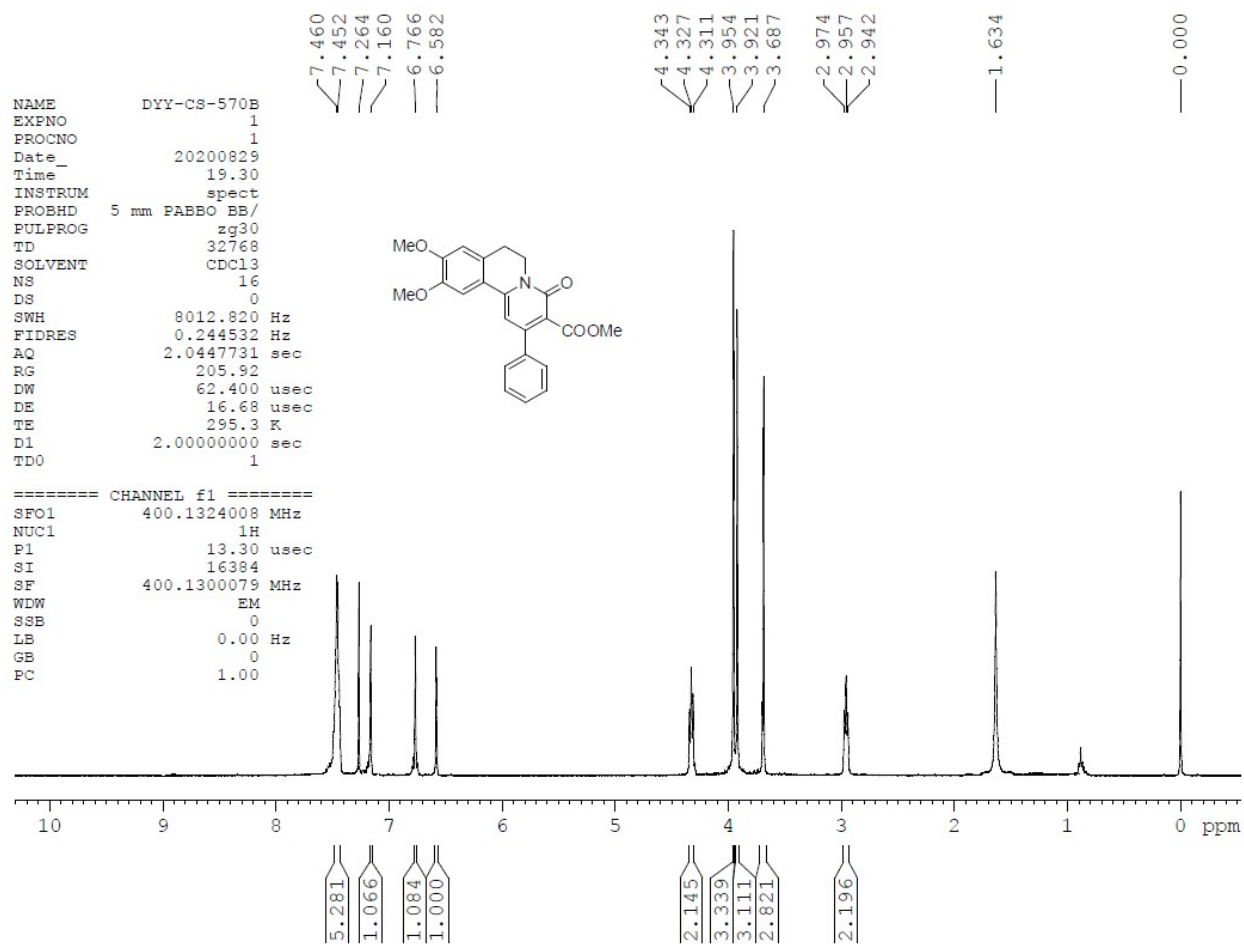

<sup>13</sup>C NMR of compound **6l** (CDCl<sub>3</sub>)

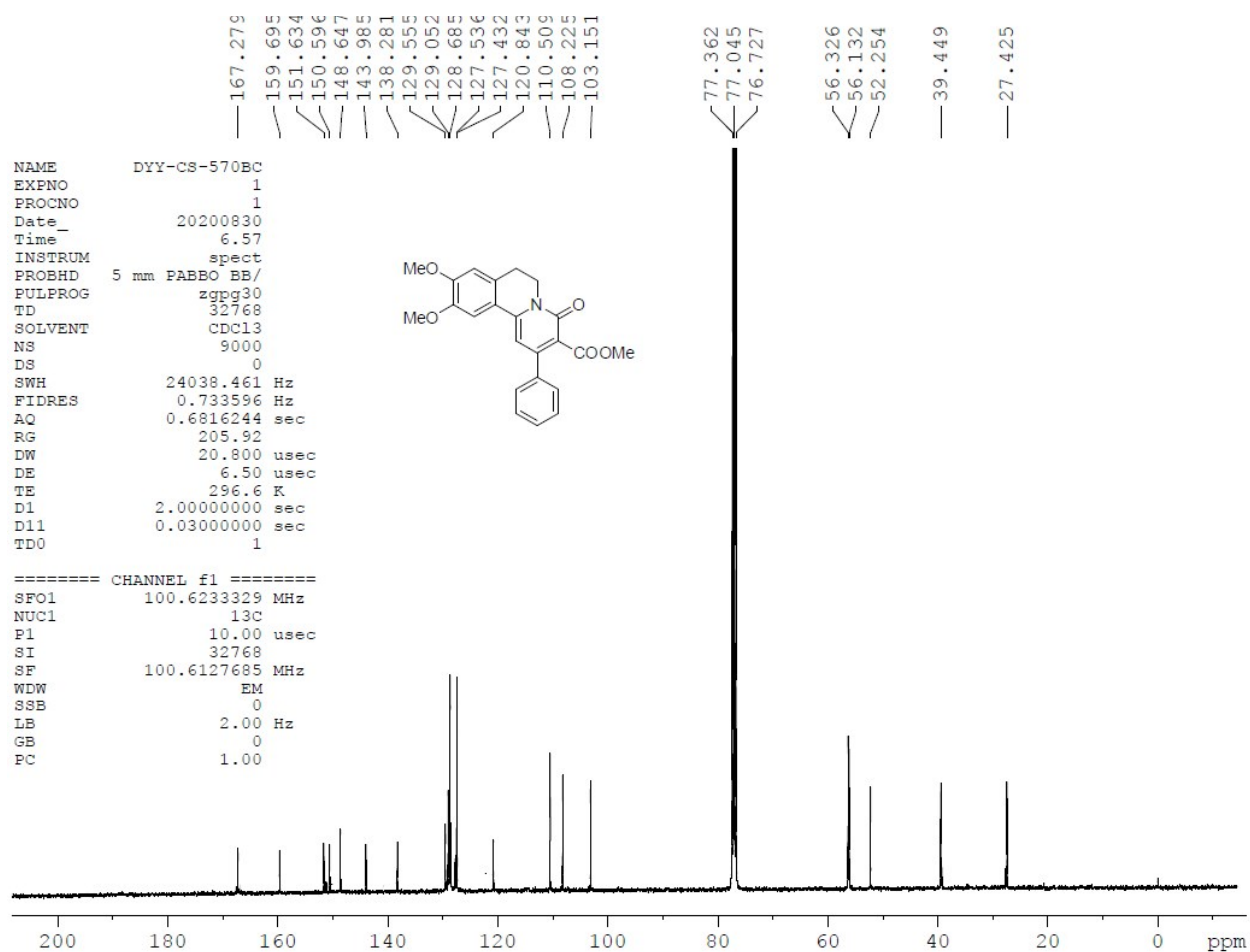

<sup>1</sup>H NMR of compound **6m** (CDCl<sub>3</sub>)

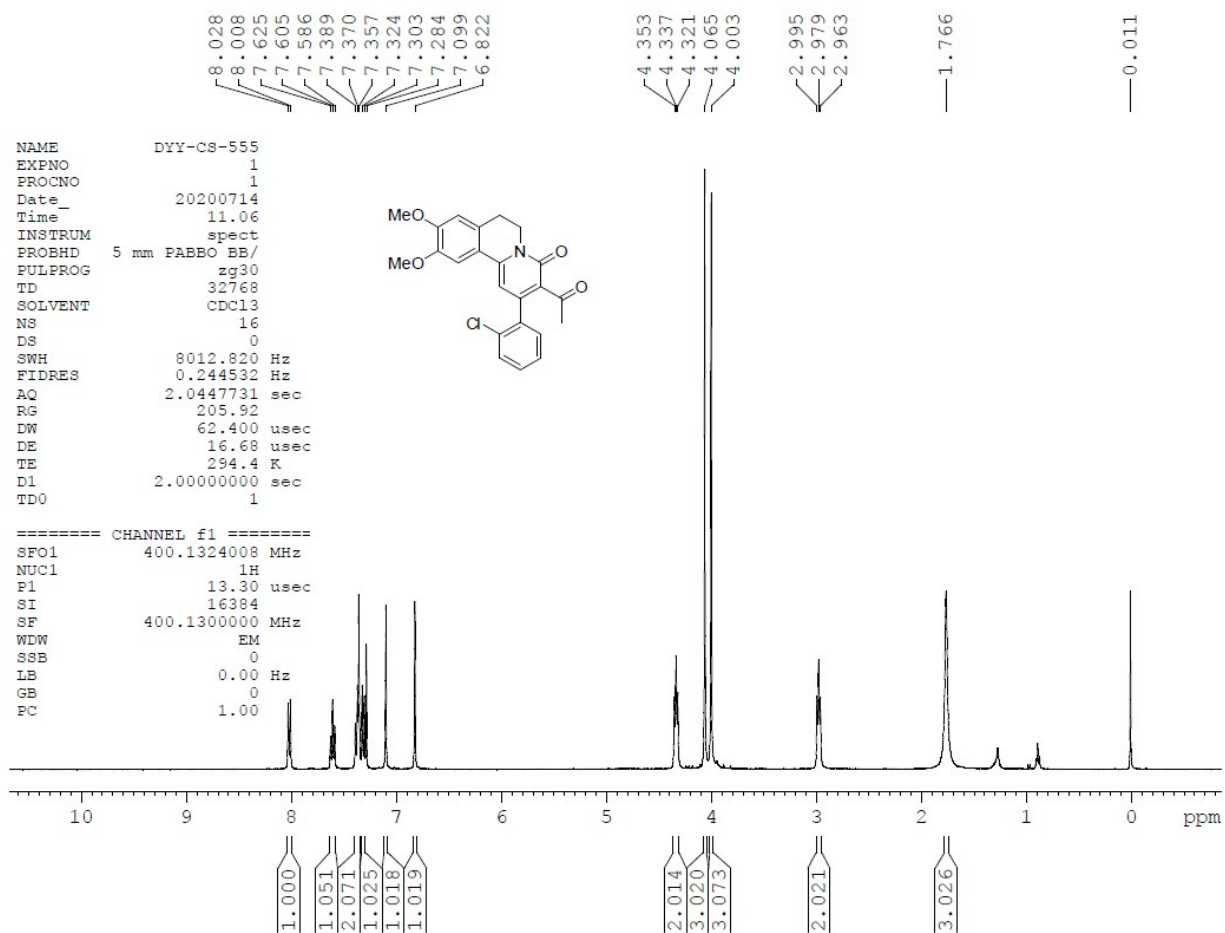

<sup>13</sup>C NMR of compound **6m** (CDCl<sub>3</sub>)

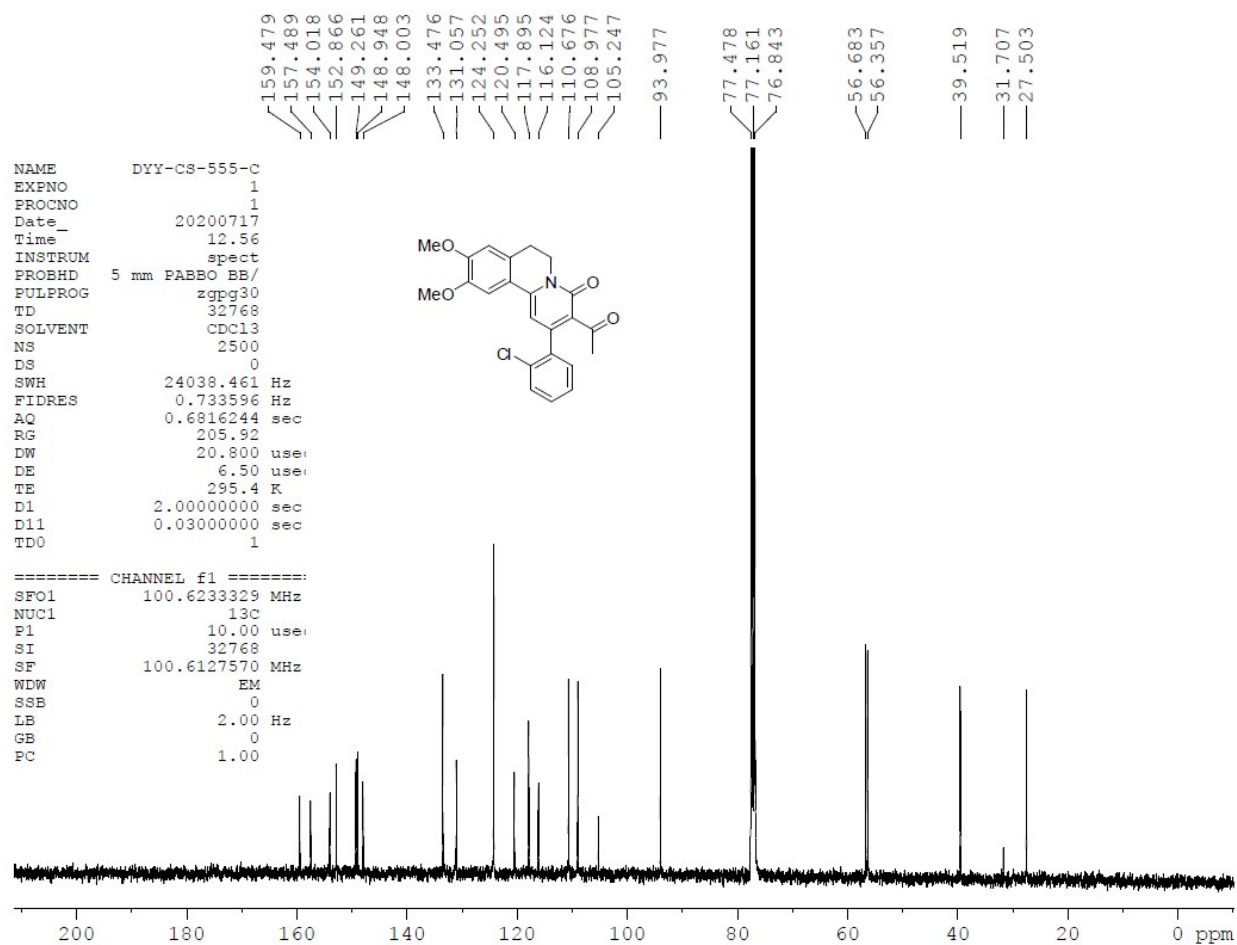

<sup>1</sup>H NMR of compound **8a** (CDCl<sub>3</sub>)

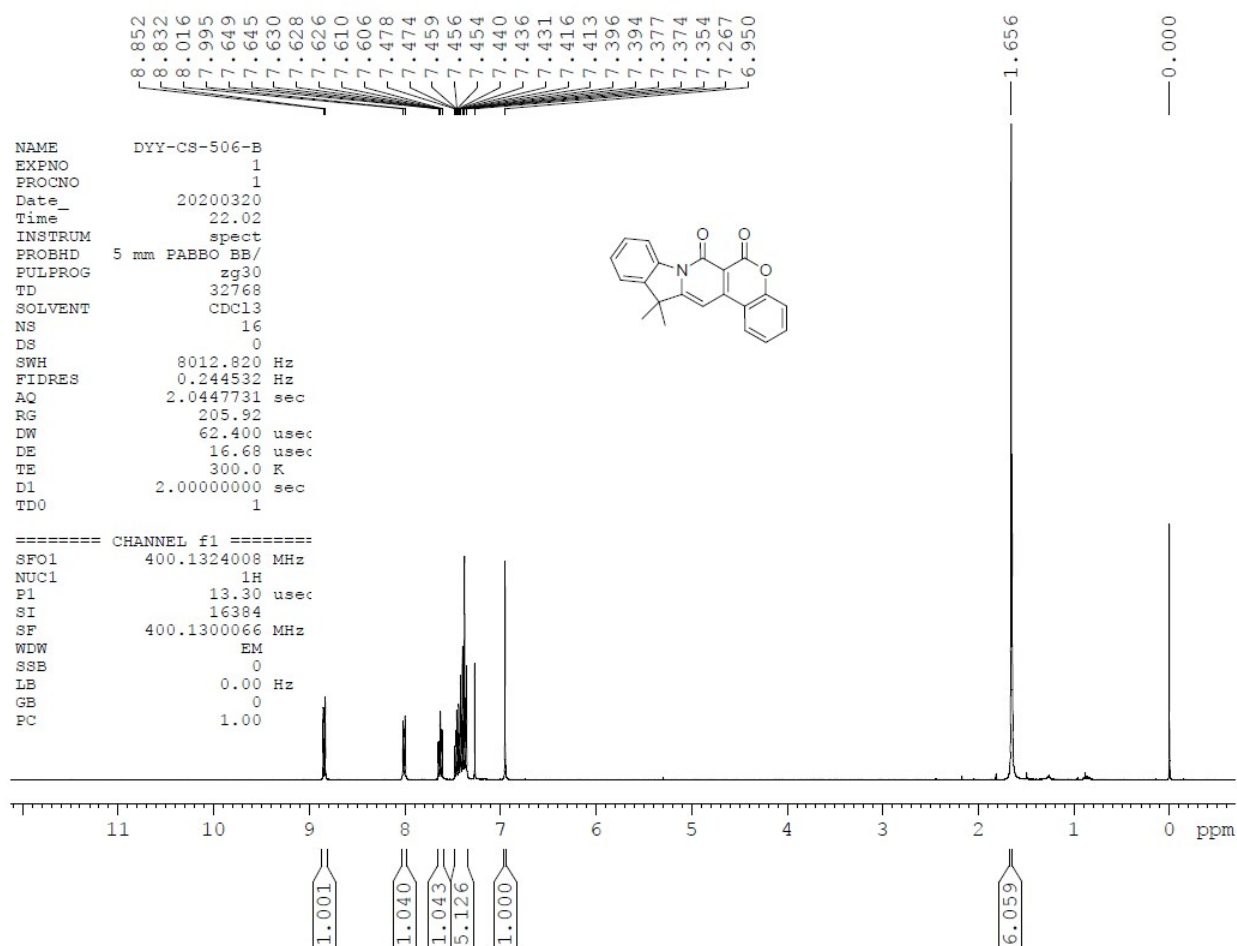

<sup>13</sup>C NMR of compound **8a** (CDCl<sub>3</sub>)

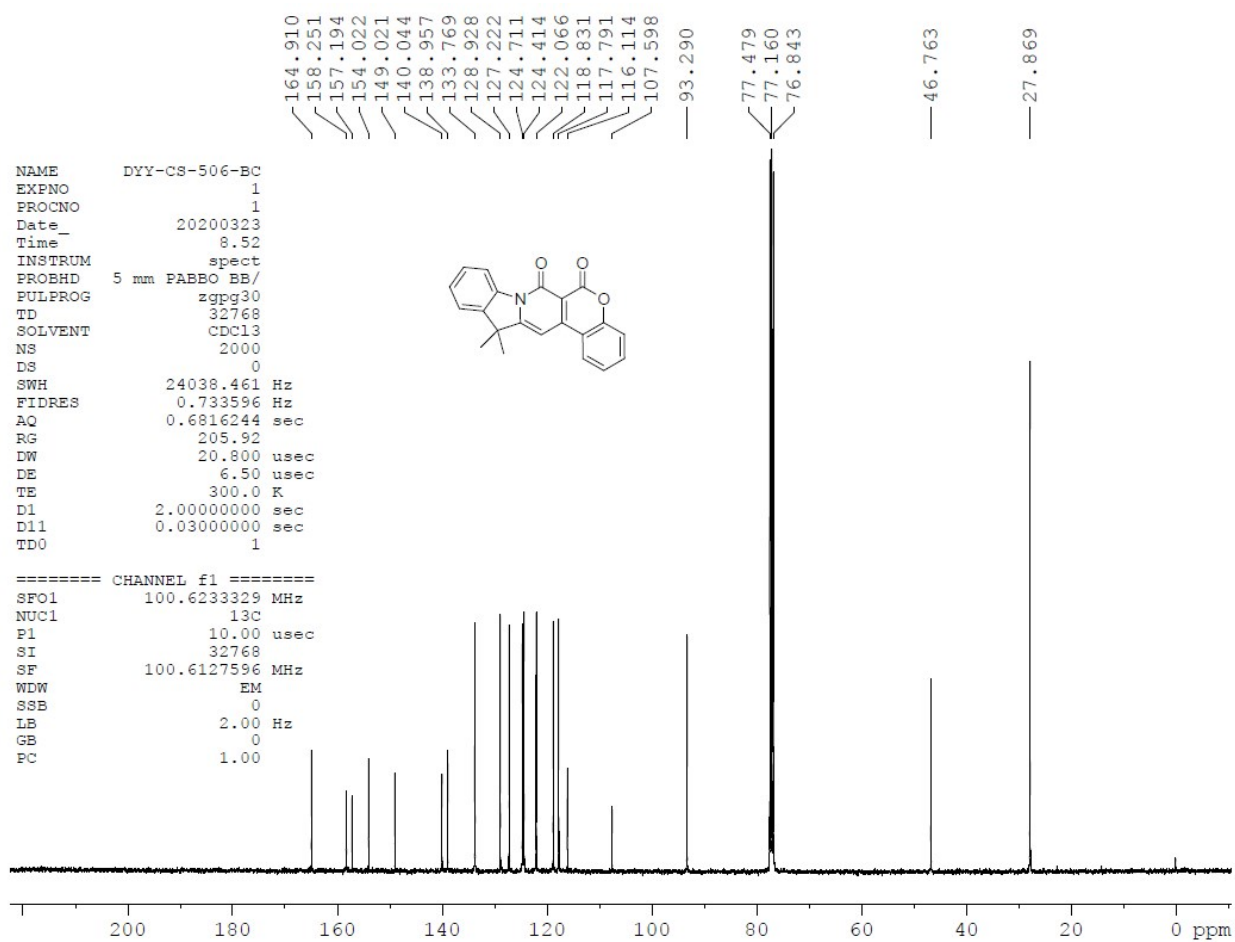

<sup>1</sup>H NMR of compound **8b** (CDCl<sub>3</sub>)

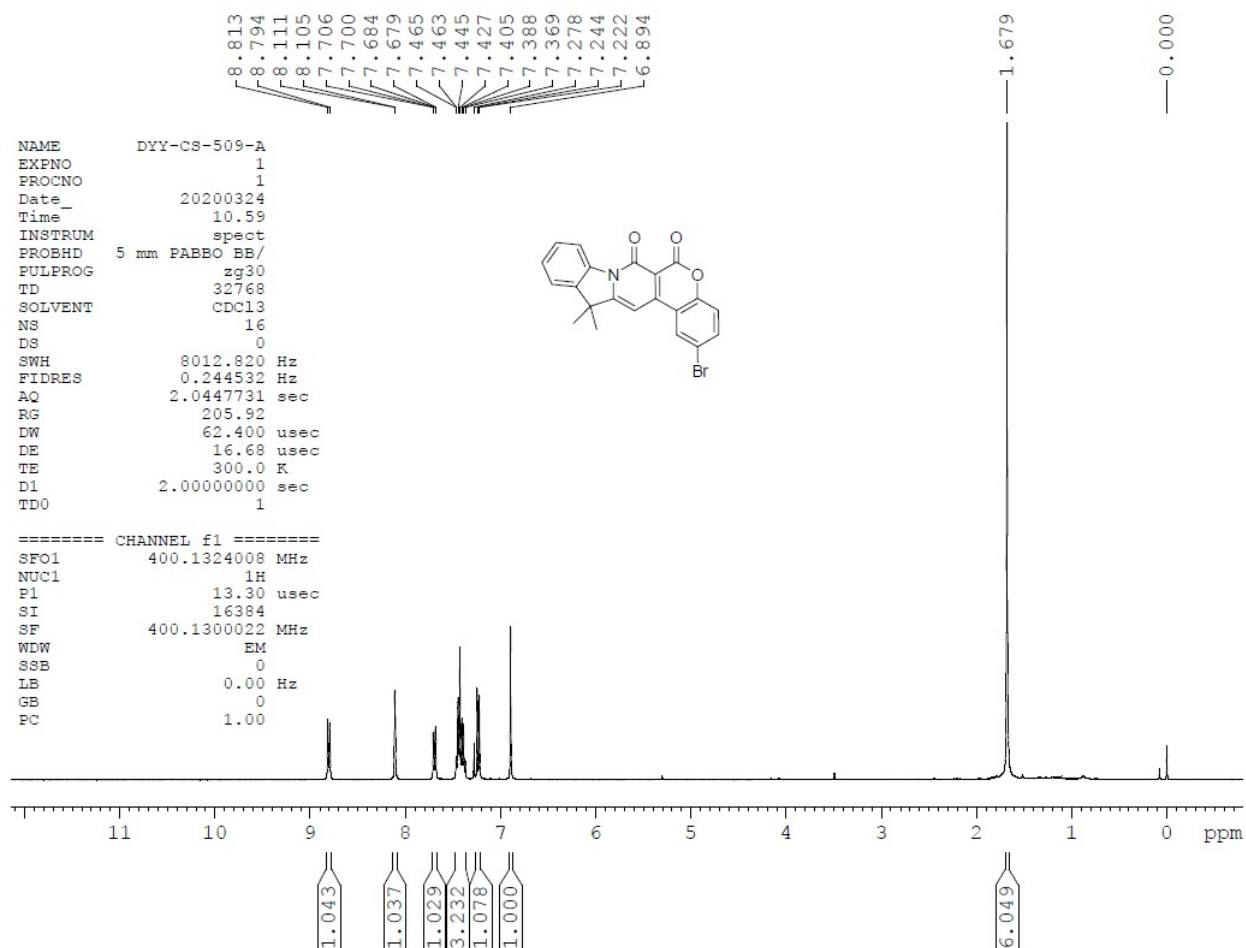

<sup>13</sup>C NMR of compound **8b** (CDCl<sub>3</sub>)

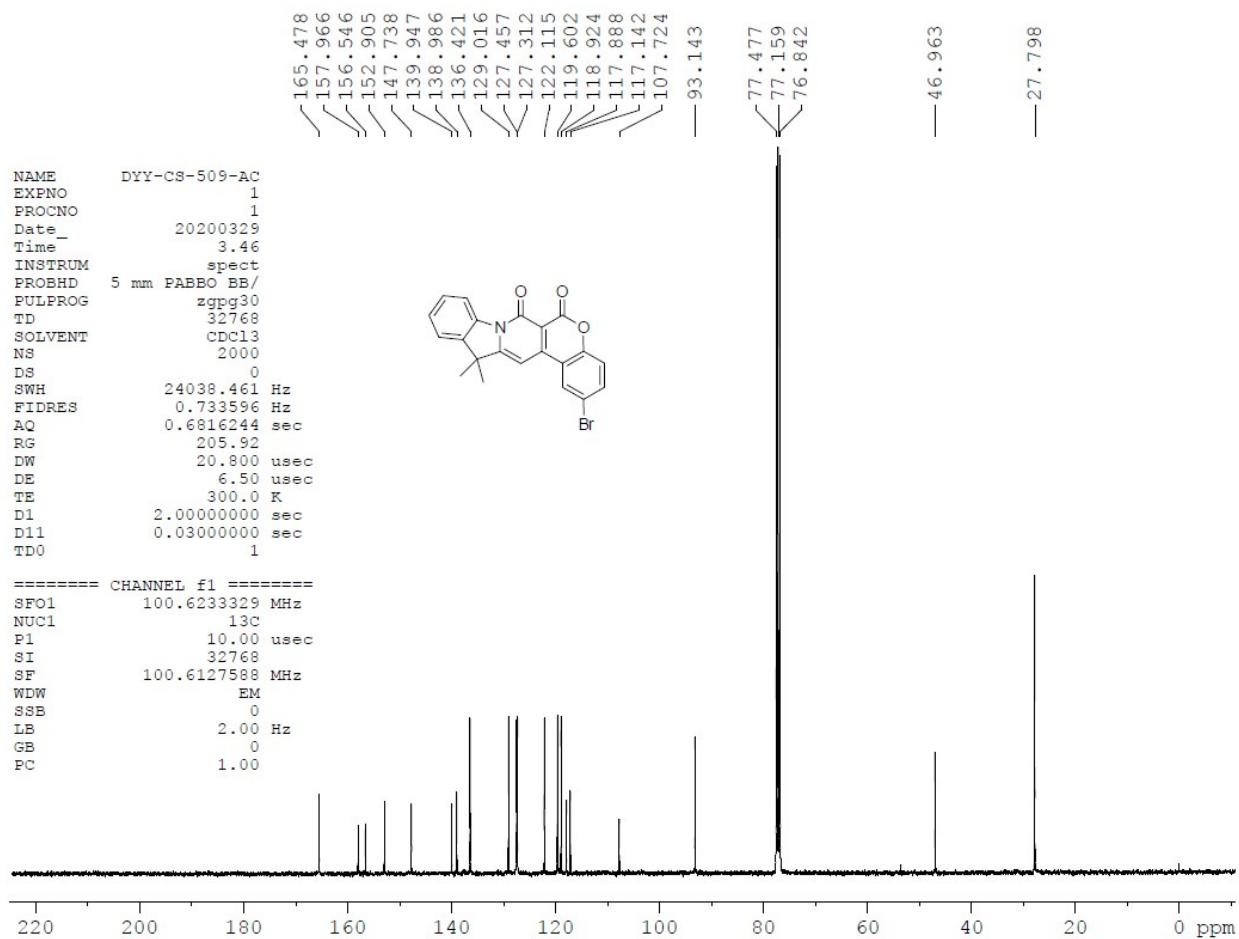

<sup>1</sup>H NMR of compound **8c** (CDCl<sub>3</sub>)

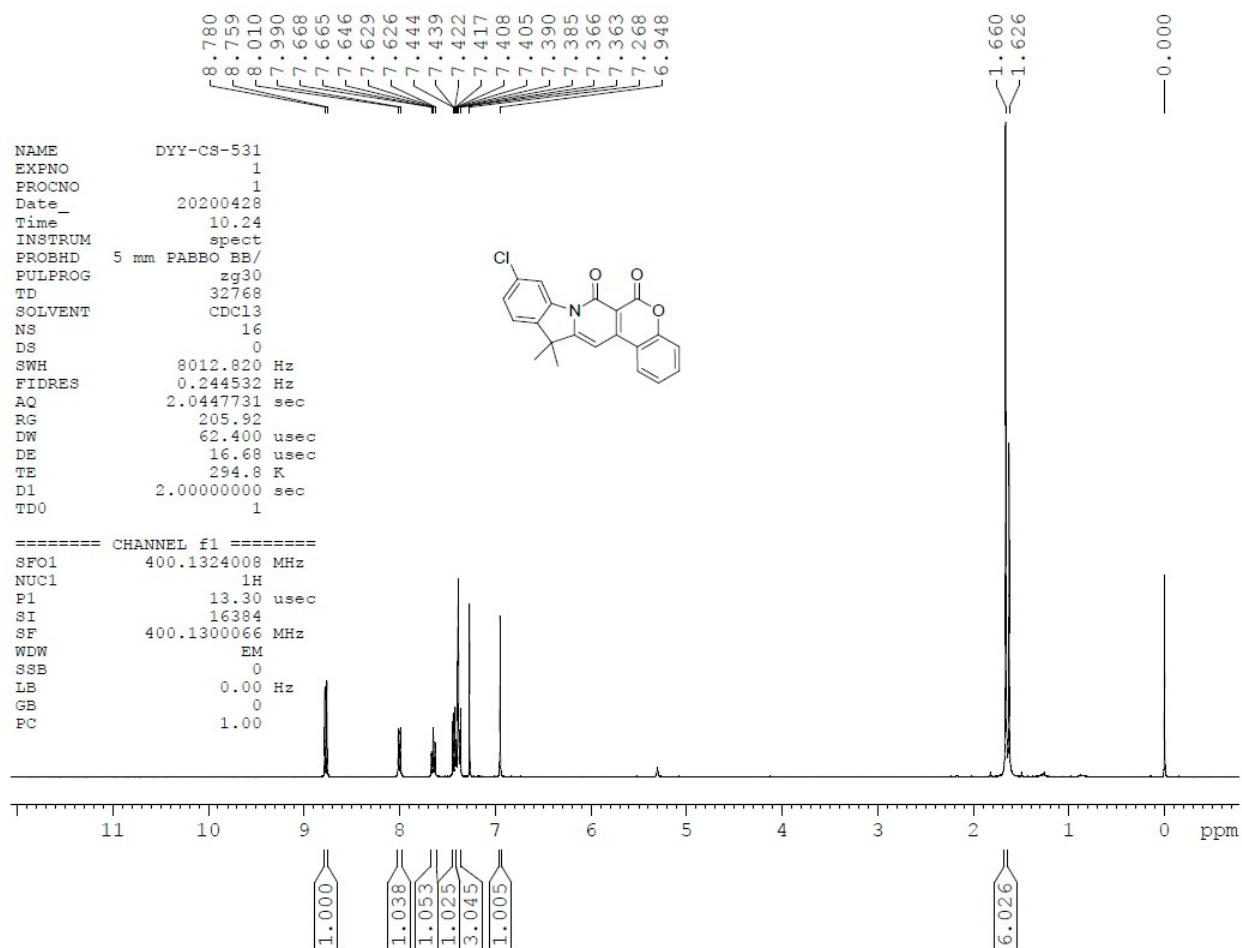

<sup>13</sup>C NMR of compound **8c** (CDCl<sub>3</sub>)

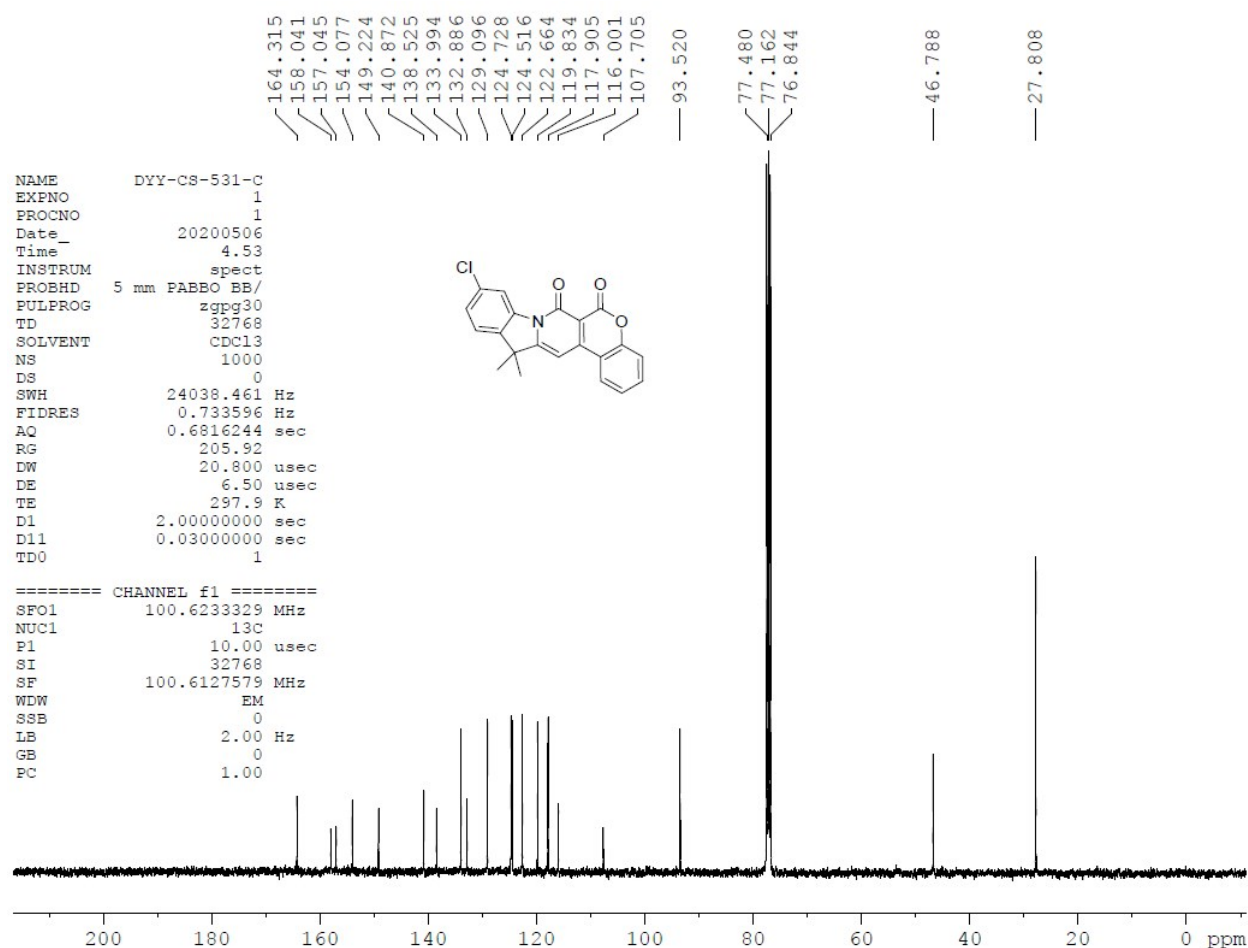

<sup>1</sup>H NMR of compound **8d** (CDCl<sub>3</sub>)

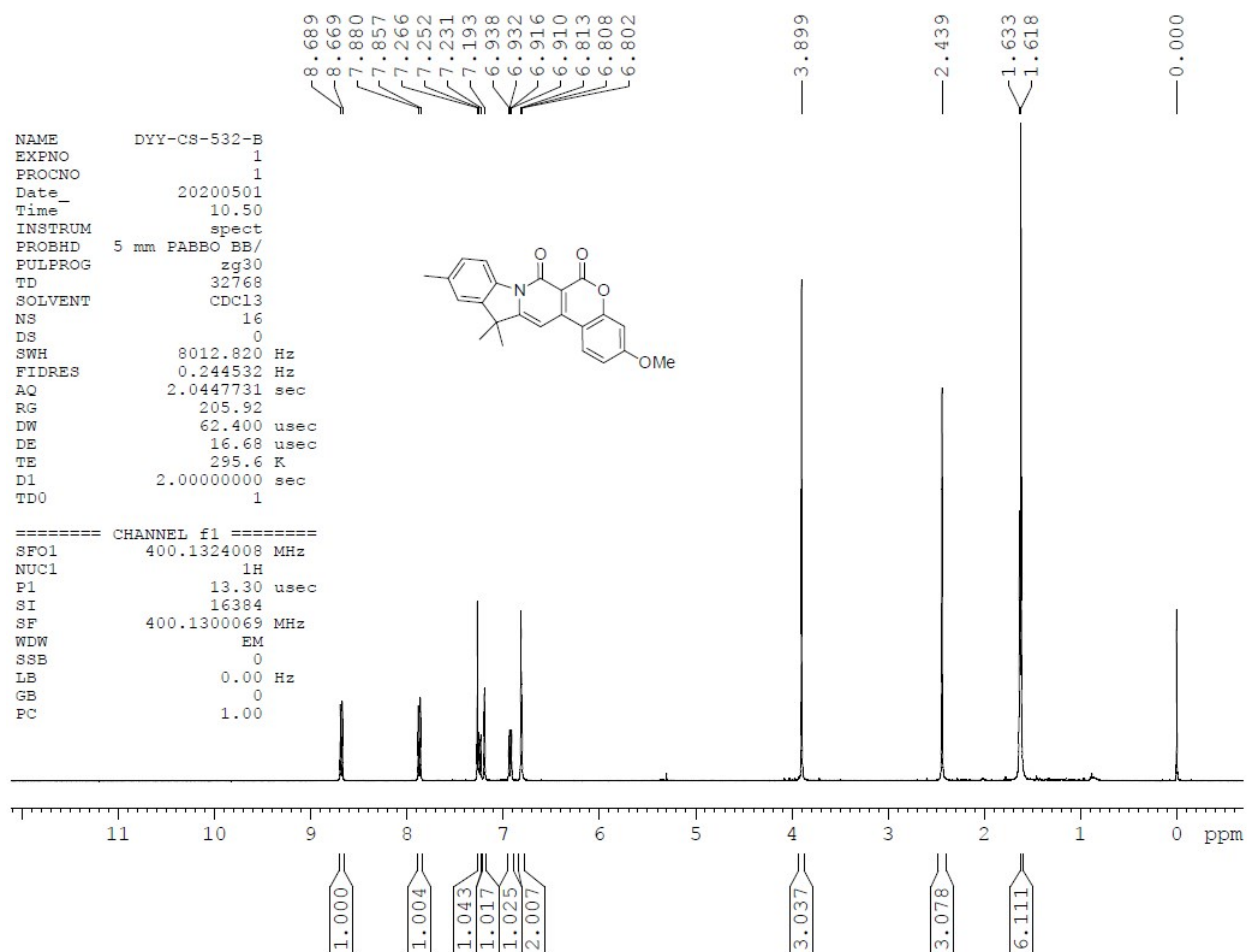

$^{13}\text{C}$  NMR of compound **8d** (DMSO- $d_6$ )

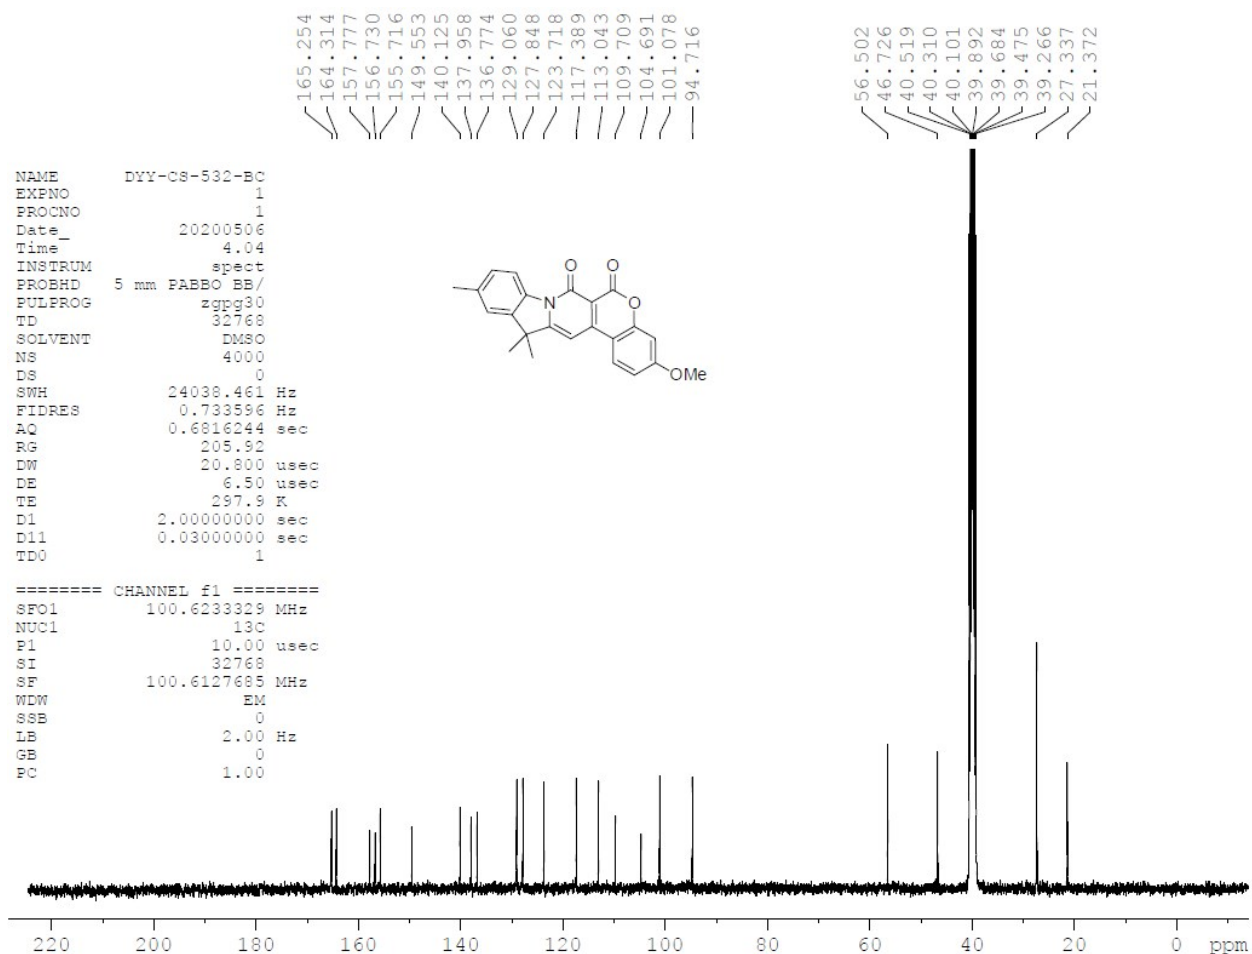

<sup>1</sup>HNMR of compound **10a** (DMSO-*d*<sub>6</sub>)

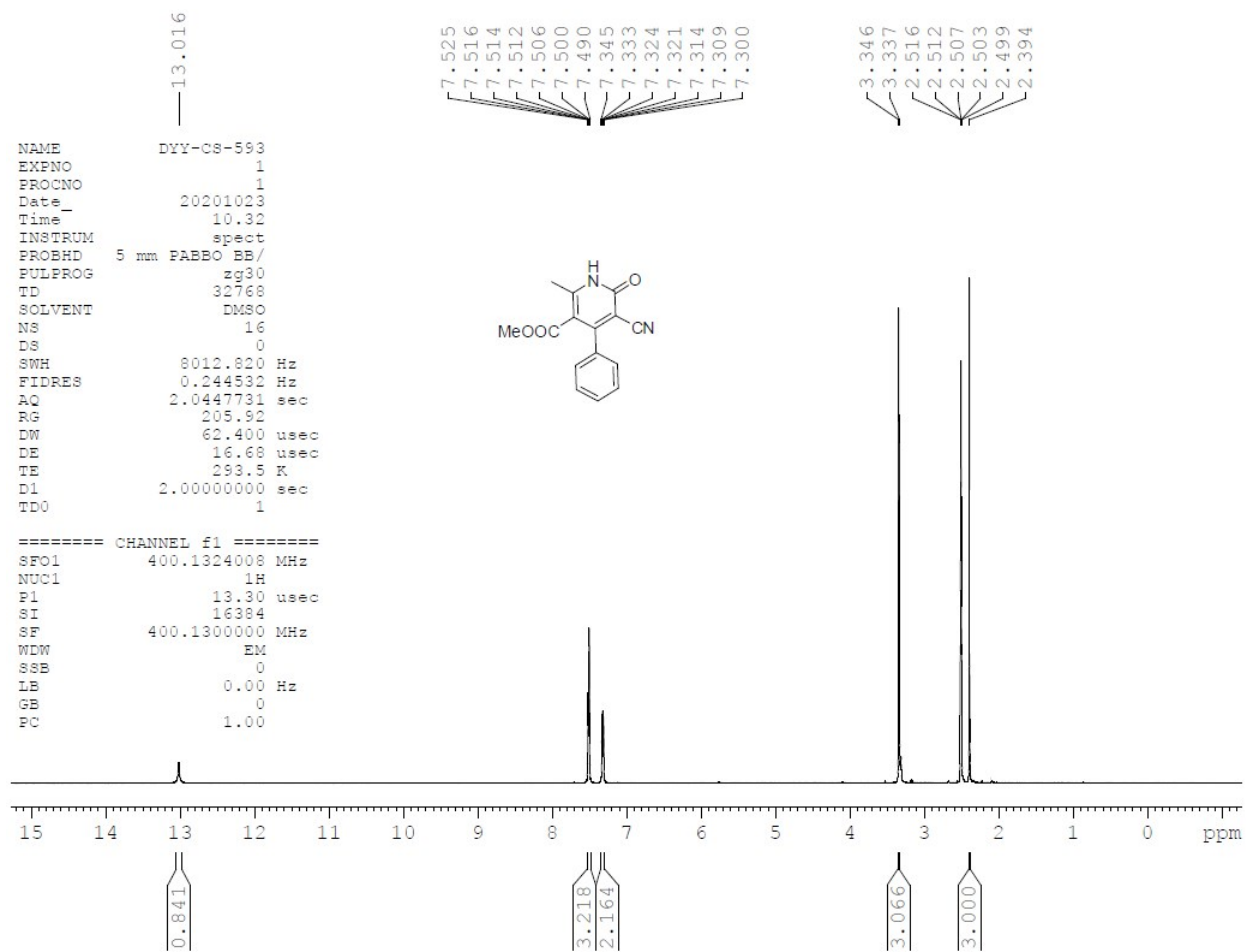

NAME DYI-08-593C  
EXPNO 1  
PROCNO 1  
Date\_ 20201028  
Time 1.45  
INSTRUM spect  
PROBHD 5 mm PABBO BB/  
PULPROG zgpg30  
TD 32768  
SOLVENT DMSO  
NS 5000  
DS 0  
SWH 24038.461 Hz  
FIDRES 0.733596 Hz  
AQ 0.6816244 sec  
RG 205.92  
DW 20.800 usec  
DE 6.50 usec  
TE 295.2 K  
D1 2.00000000 sec  
D11 0.03000000 sec  
TD0 1

===== CHANNEL f1 =====  
SFO1 100.6233329 MHz  
NUC1 13C  
P1 10.00 usec  
SI 32768  
SF 100.6127685 MHz  
WDW EM  
SSB 0  
LB 2.00 Hz  
GB 0  
PC 1.00

165.946  
160.308  
159.837  
153.503  
136.174  
130.047  
128.985  
127.555  
115.897  
112.443  
101.041  
52.448  
40.600  
40.391  
40.183  
39.974  
39.765  
39.557  
39.348  
18.716

COC(=O)c1c[nH]c(=O)c1C#N-c2ccccc2

200 180 160 140 120 100 80 60 40 20 ppm

<sup>1</sup>HNMR of compound **10b** (CDCl<sub>3</sub>)

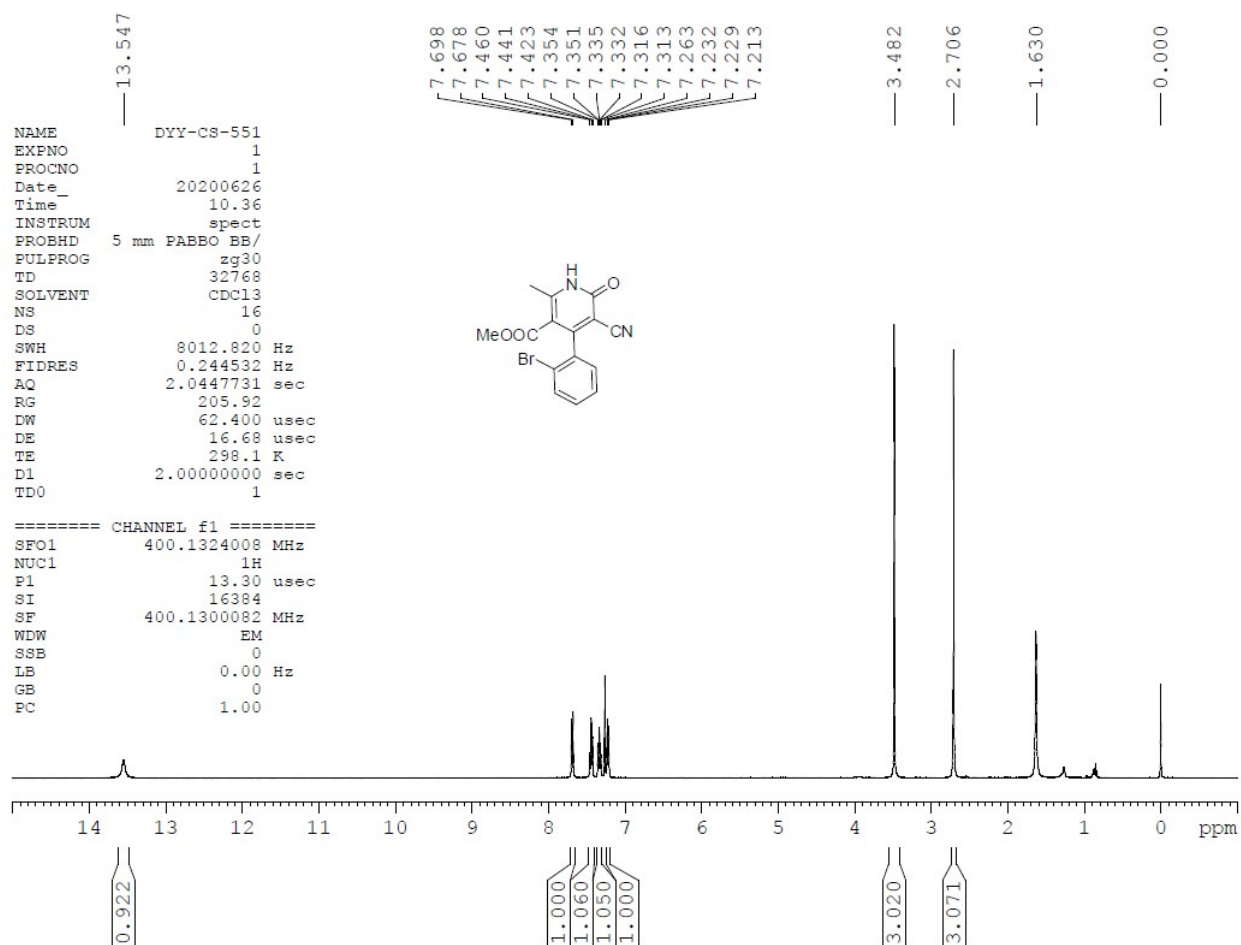

<sup>13</sup>C NMR of compound **10b** (DMSO-*d*<sub>6</sub>)

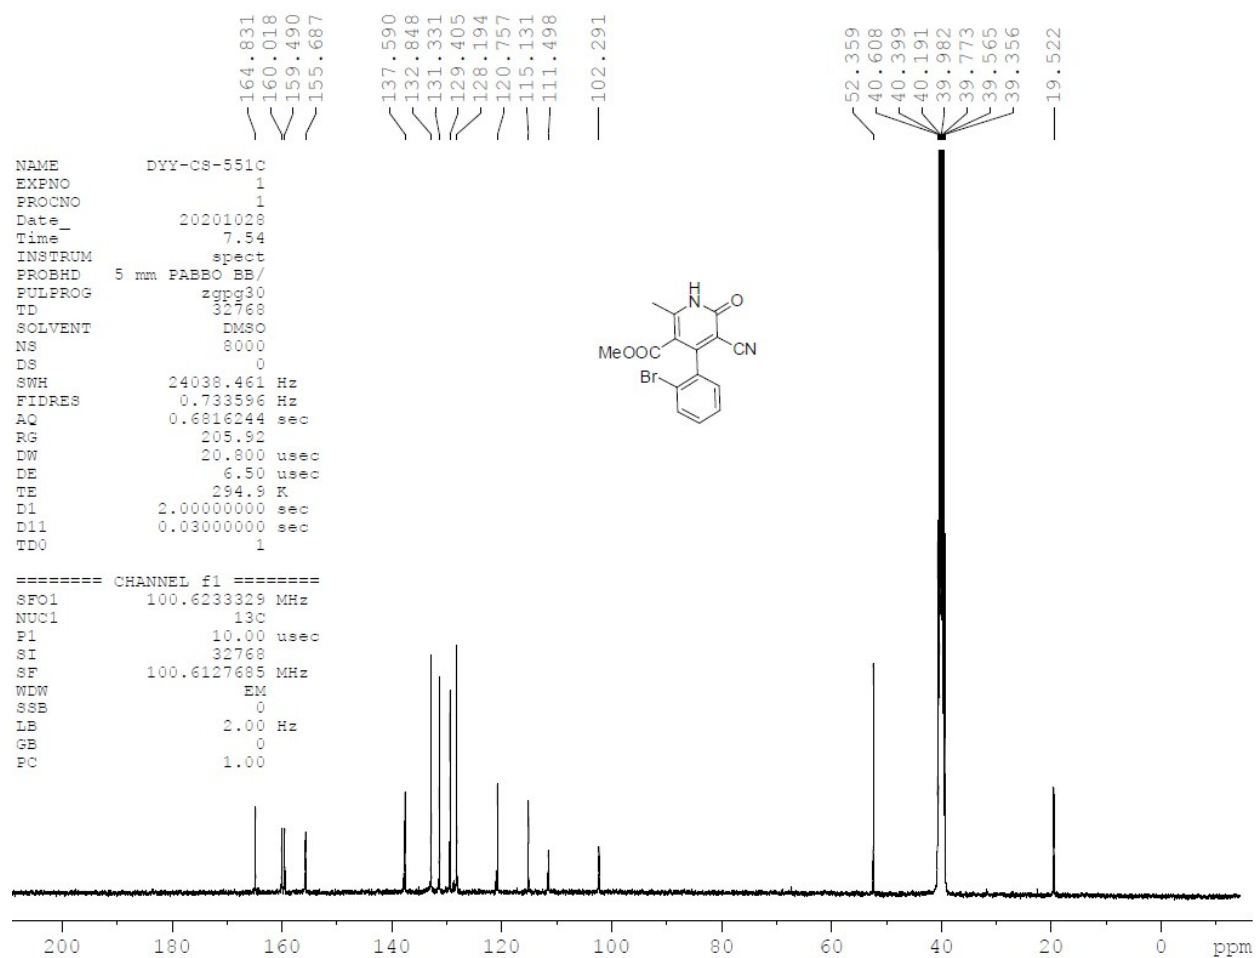

<sup>1</sup>HNMR of compound **10c** (CDCl<sub>3</sub>)

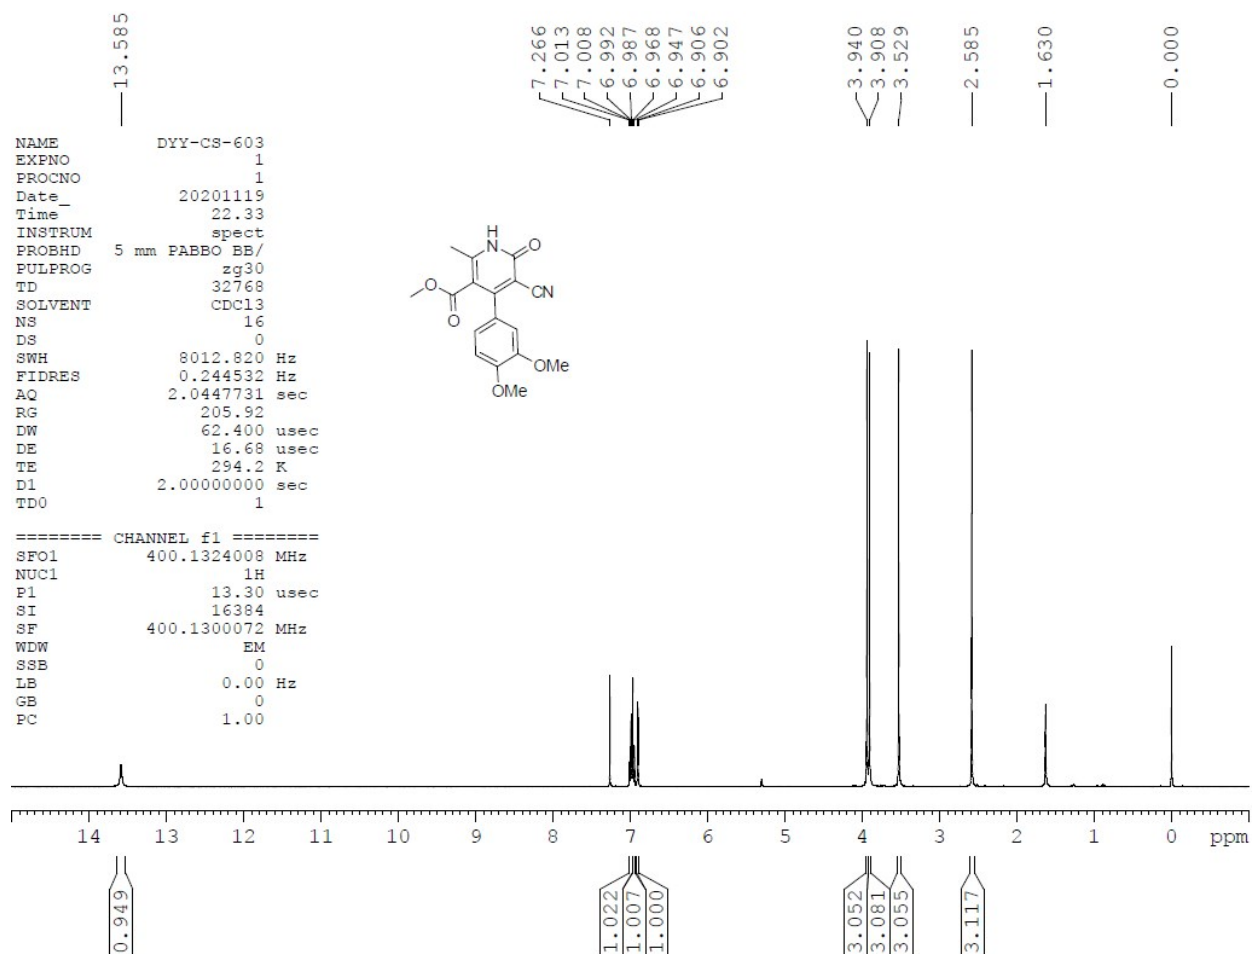

<sup>13</sup>C NMR of compound **10c** (DMSO-*d*<sub>6</sub>)

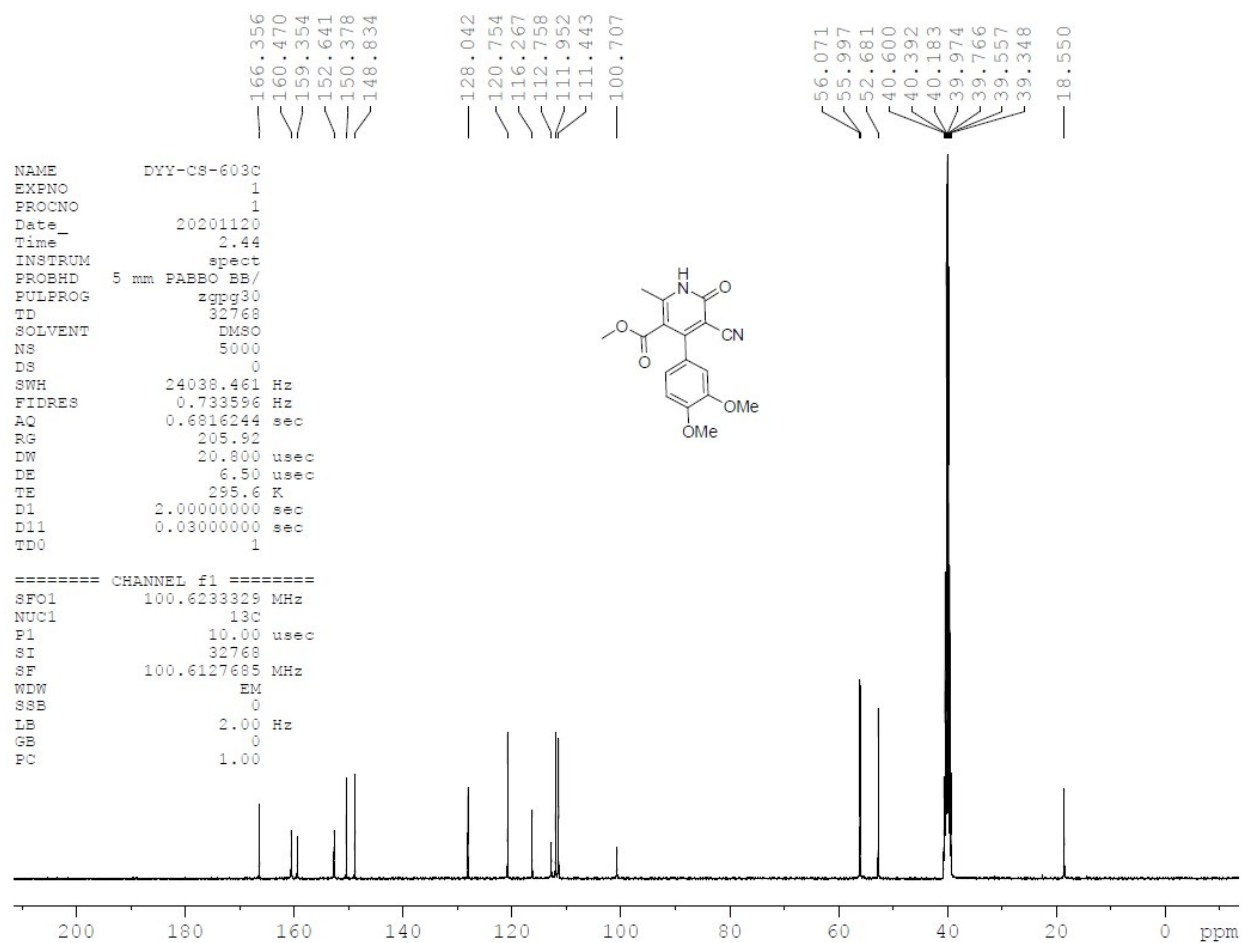

<sup>1</sup>HNMR of compound **10d** (DMSO-*d*<sub>6</sub>)

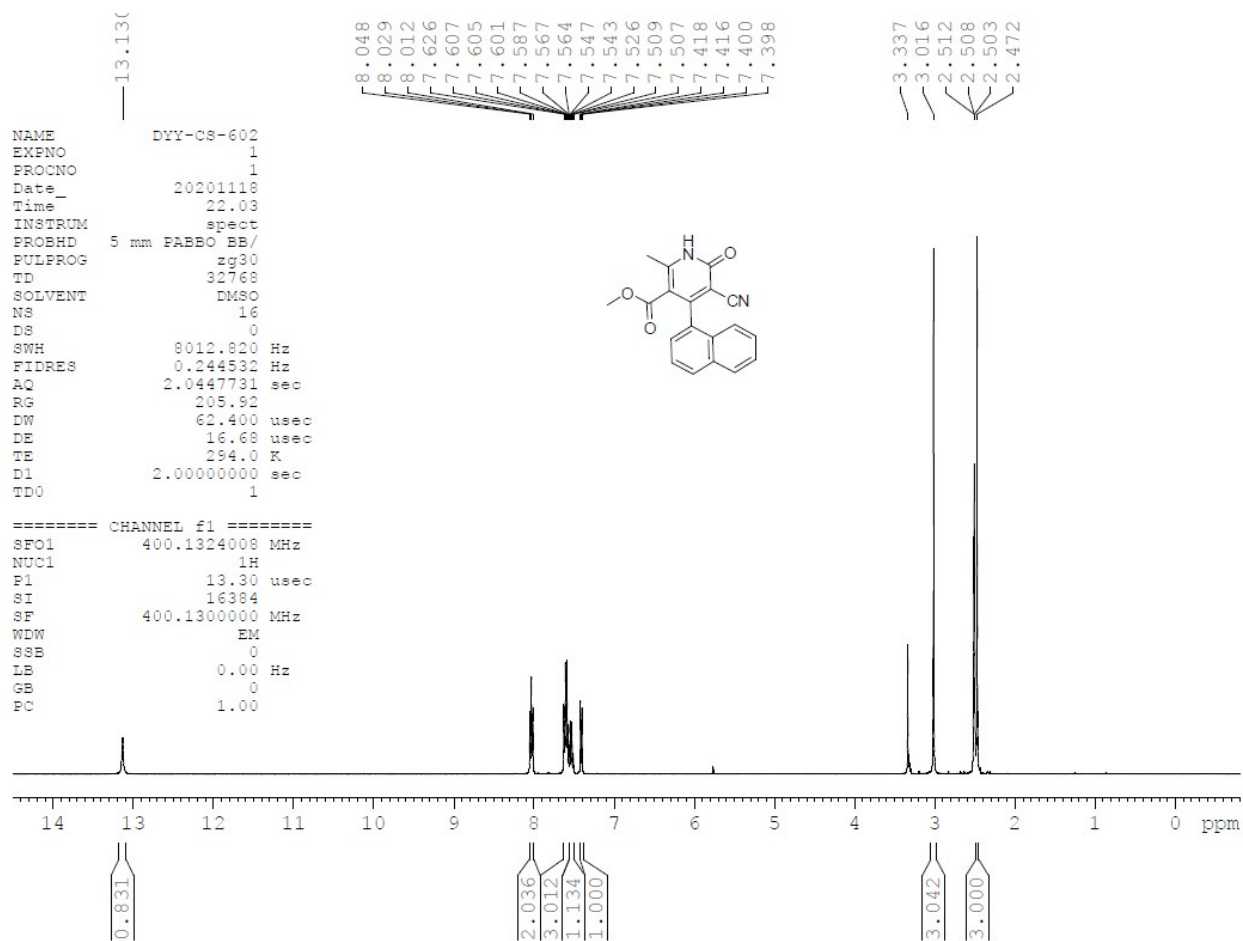

$^{13}\text{C}$  NMR of compound **10d** ( $\text{DMSO}-d_6$ )

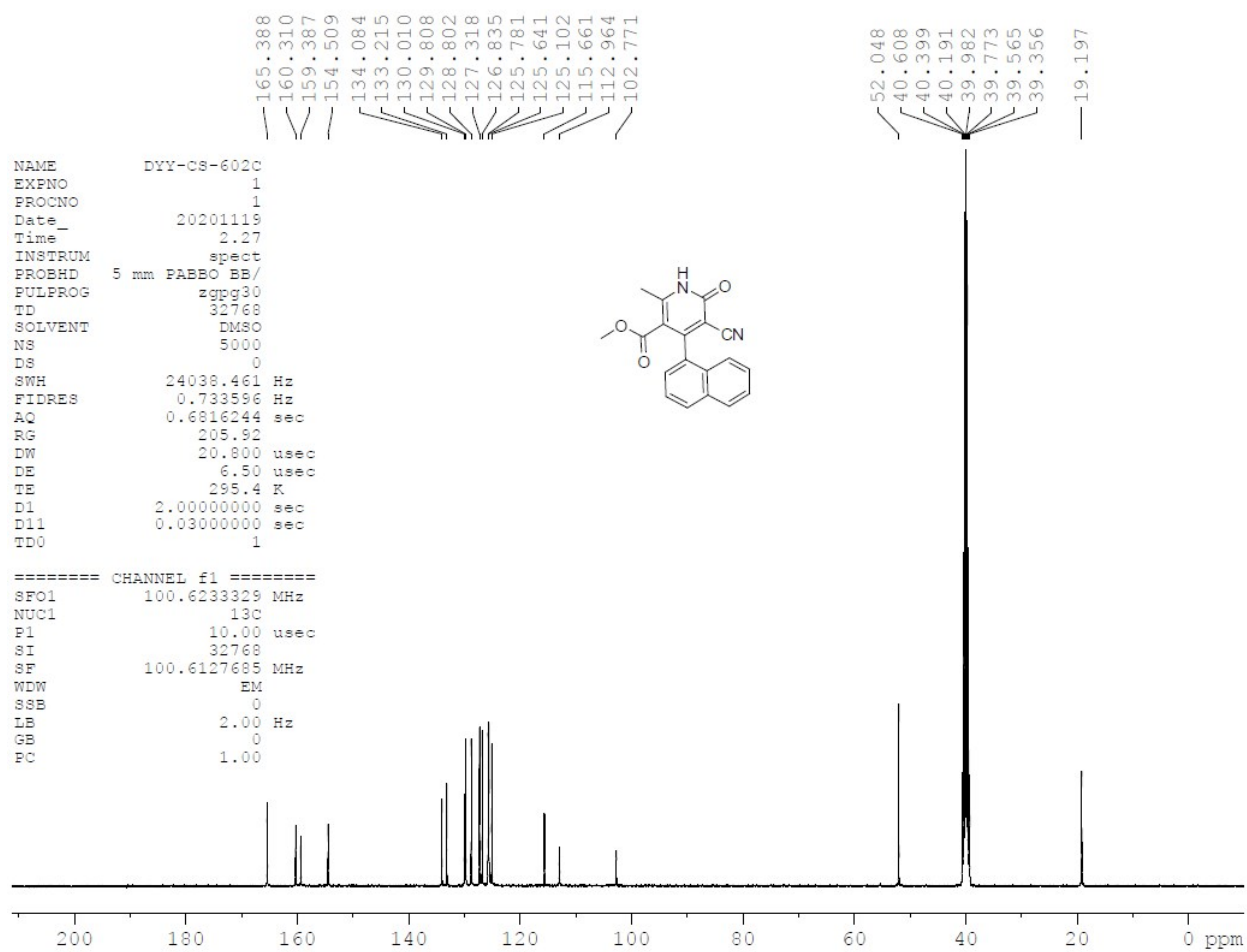

<sup>1</sup>HNMR of compound **11** (CDCl<sub>3</sub>)

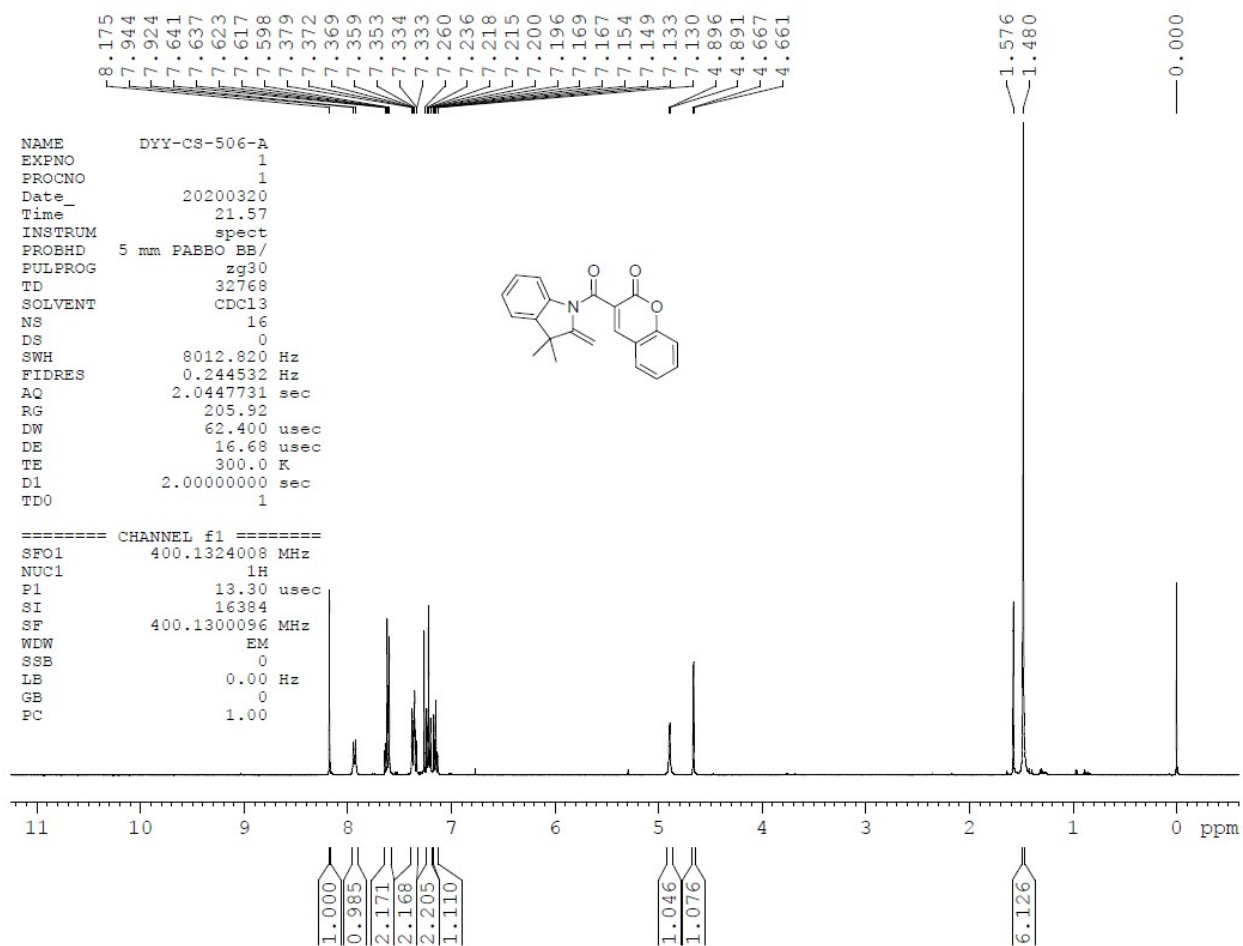

<sup>13</sup>C NMR of compound **11** (CDCl<sub>3</sub>)

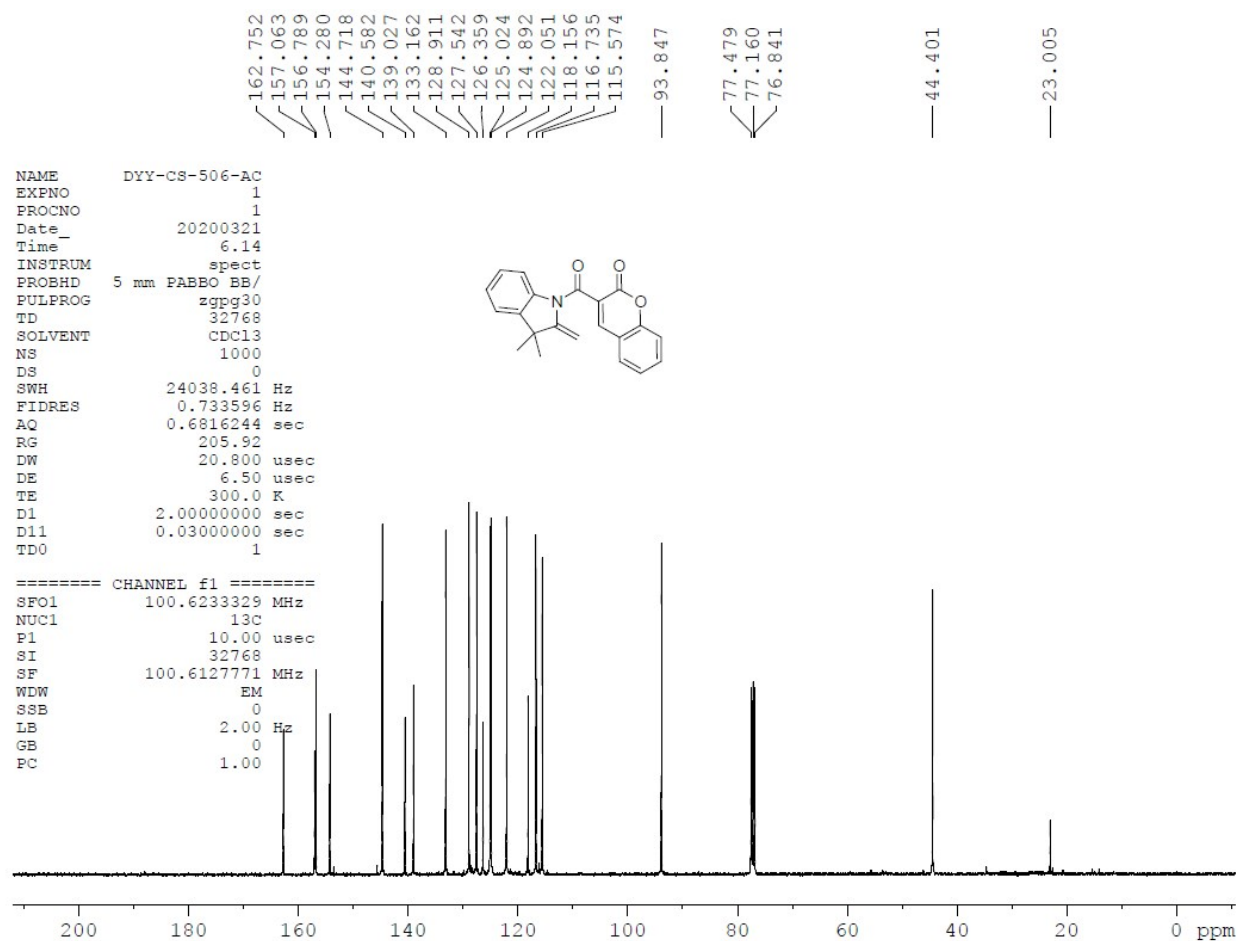

<sup>1</sup>H NMR of compound **12** (CDCl<sub>3</sub>)

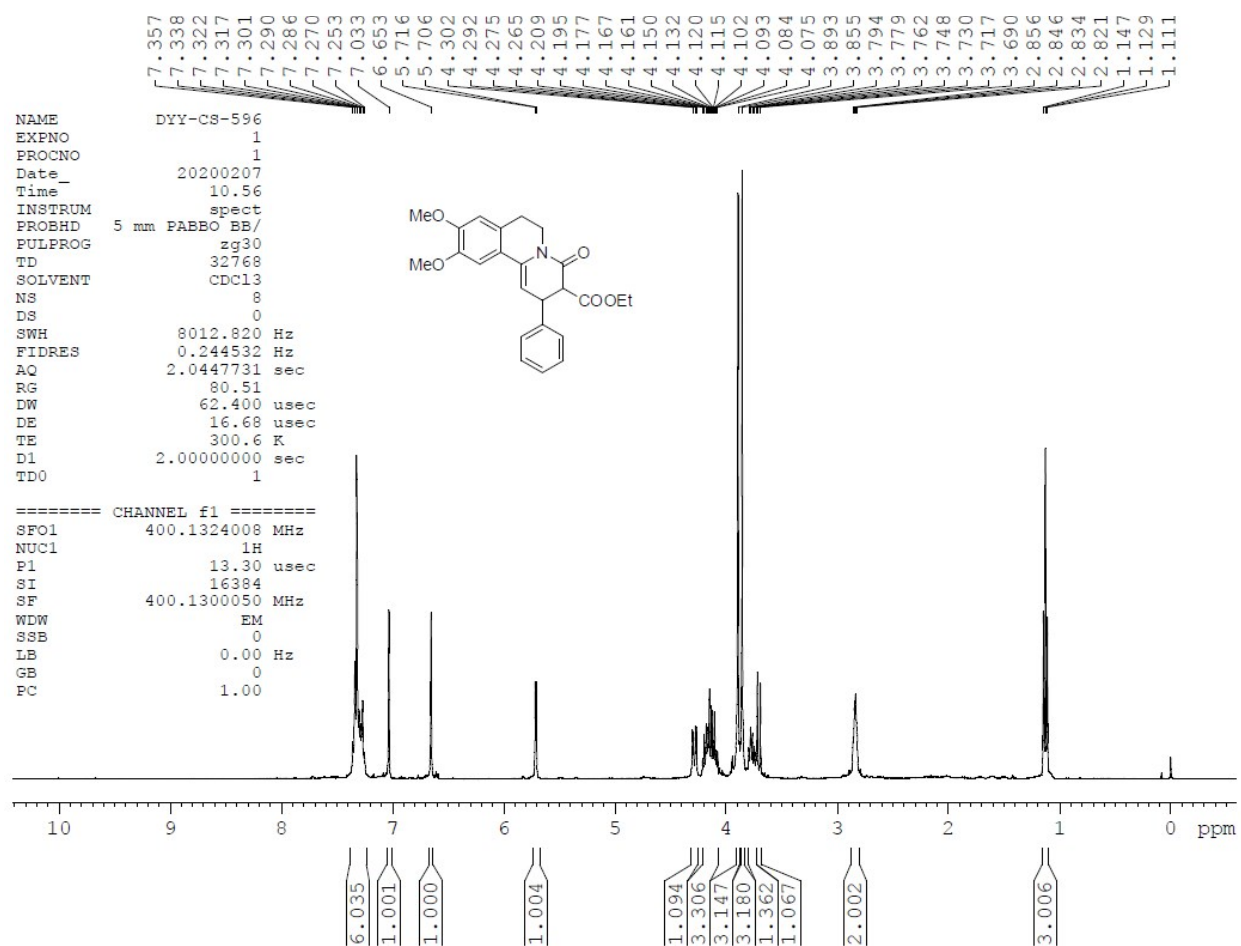

<sup>13</sup>C NMR of compound **12** (CDCl<sub>3</sub>)

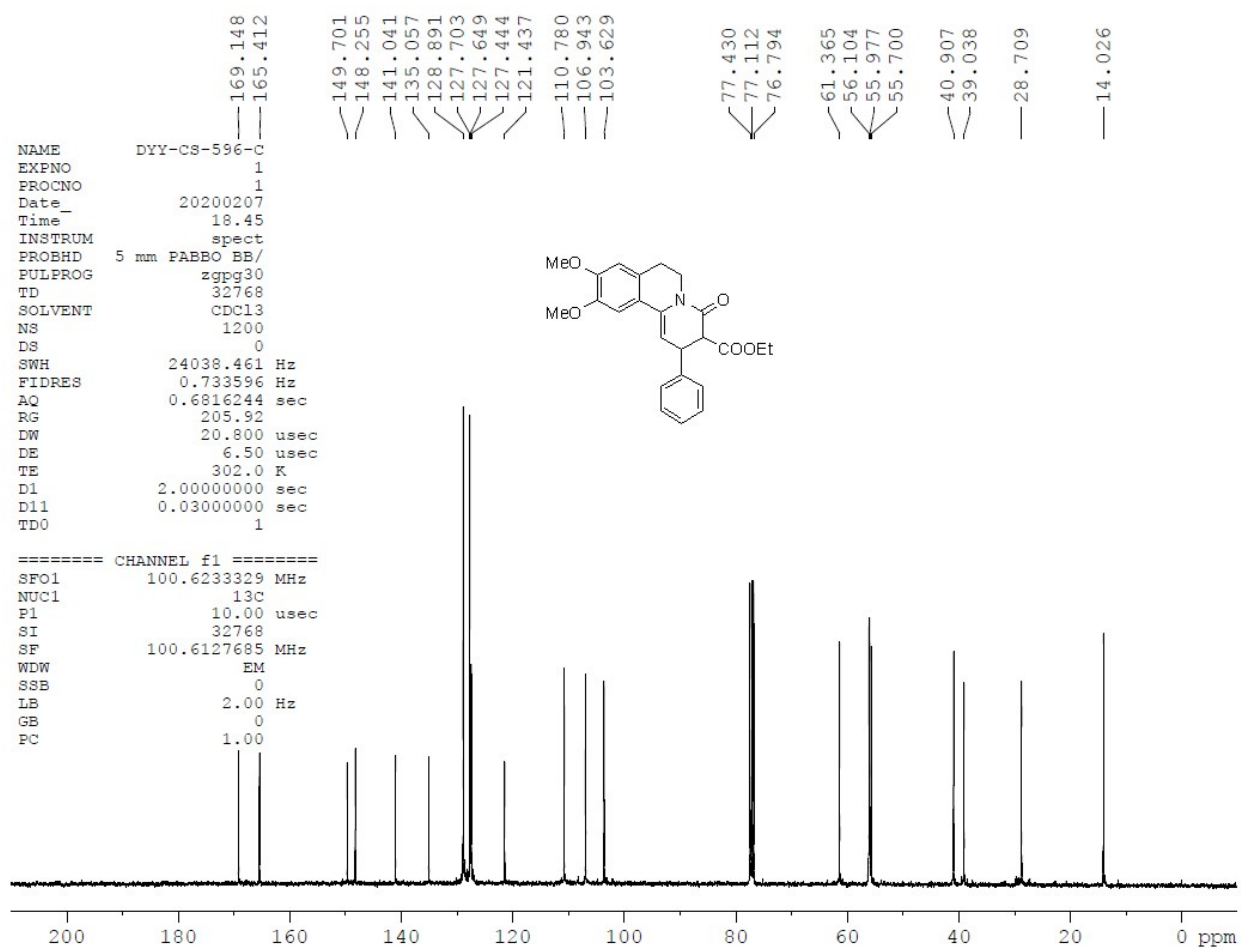

<sup>1</sup>H NMR of compound **19a** (CDCl<sub>3</sub>)

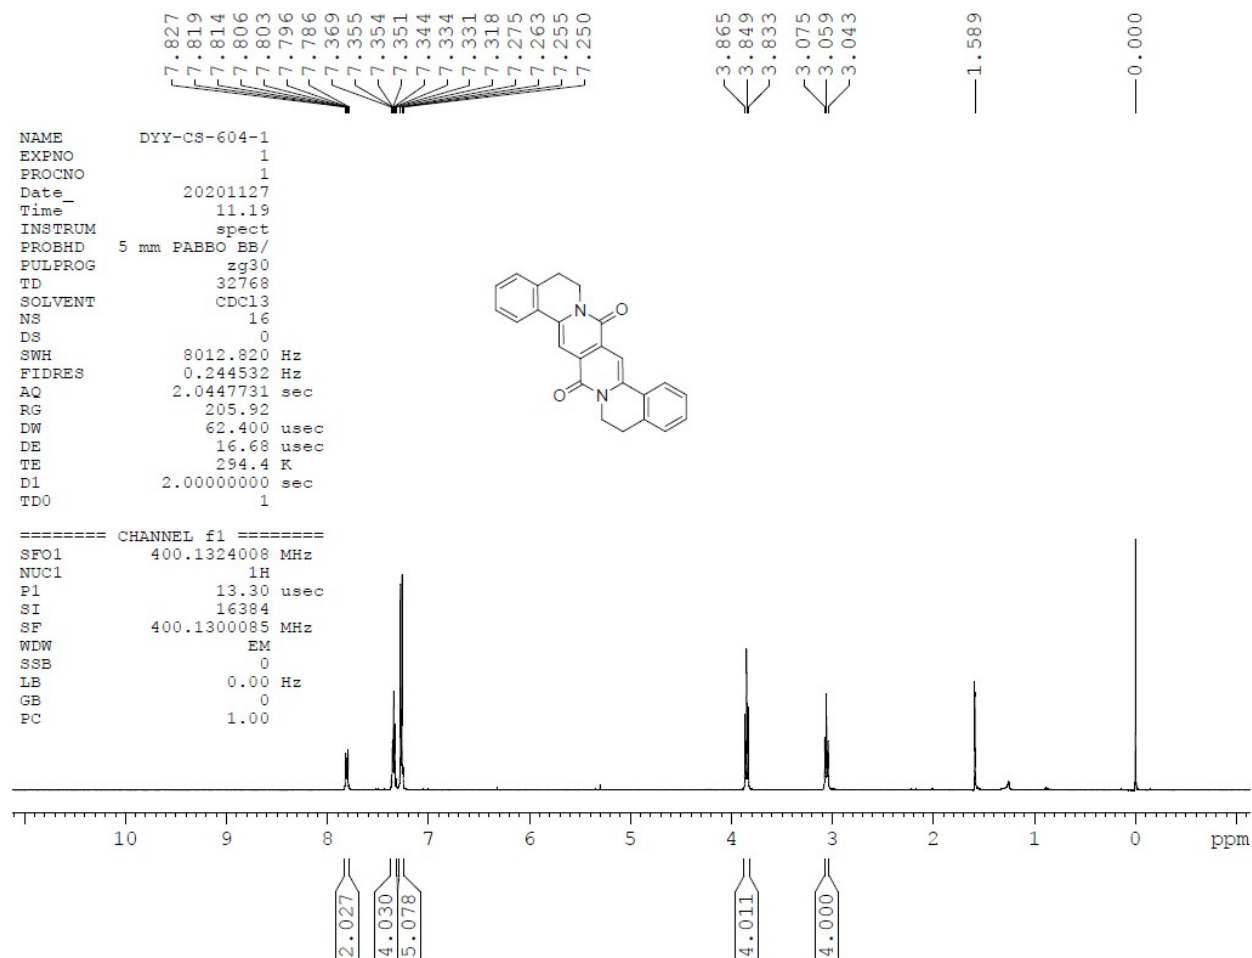

$^1\text{H}$  NMR of compound **19a** ( $\text{CDCl}_3$ )

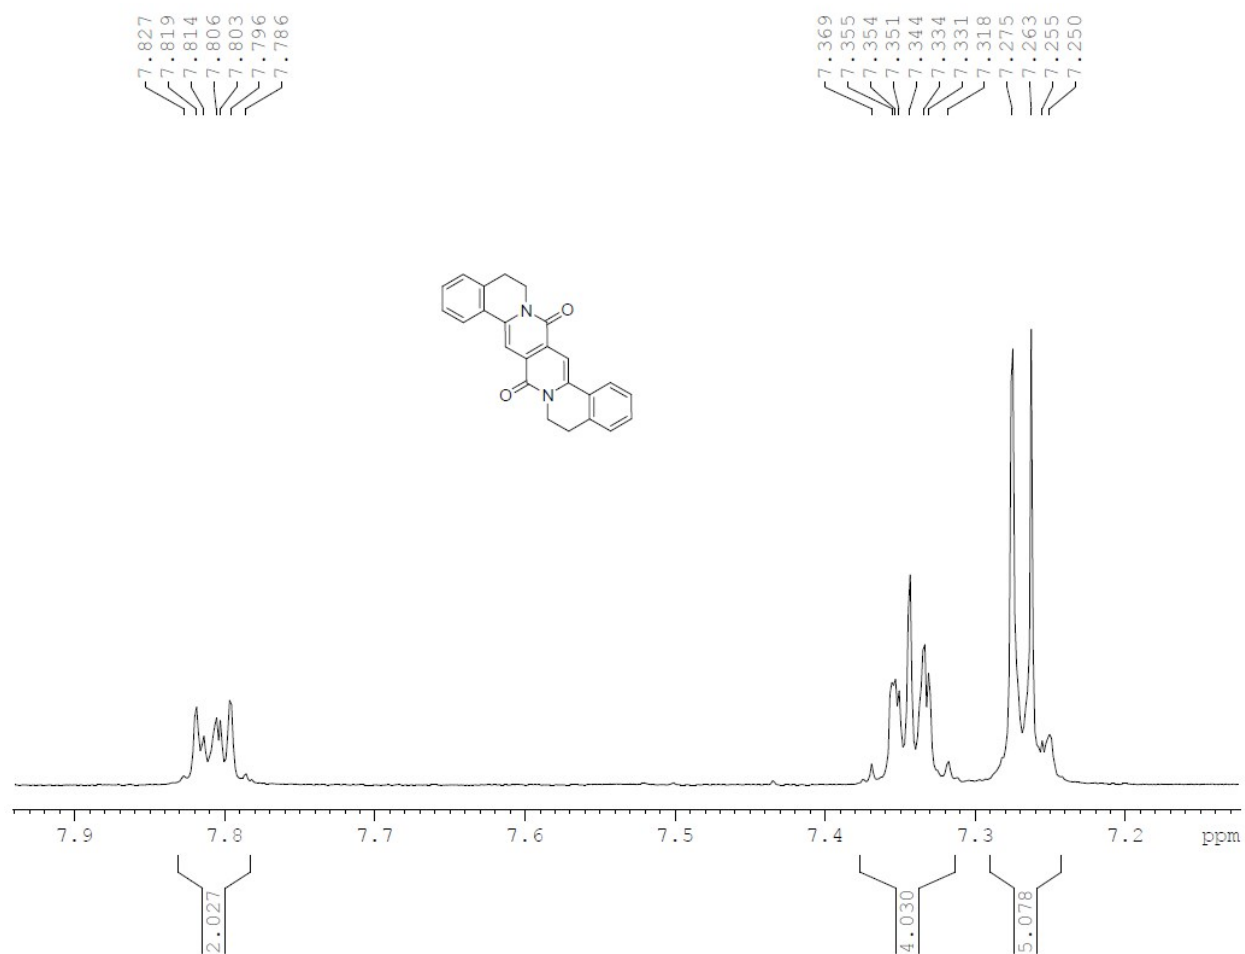

$^{13}\text{C}$  NMR of compound **19a** ( $\text{CDCl}_3$ )

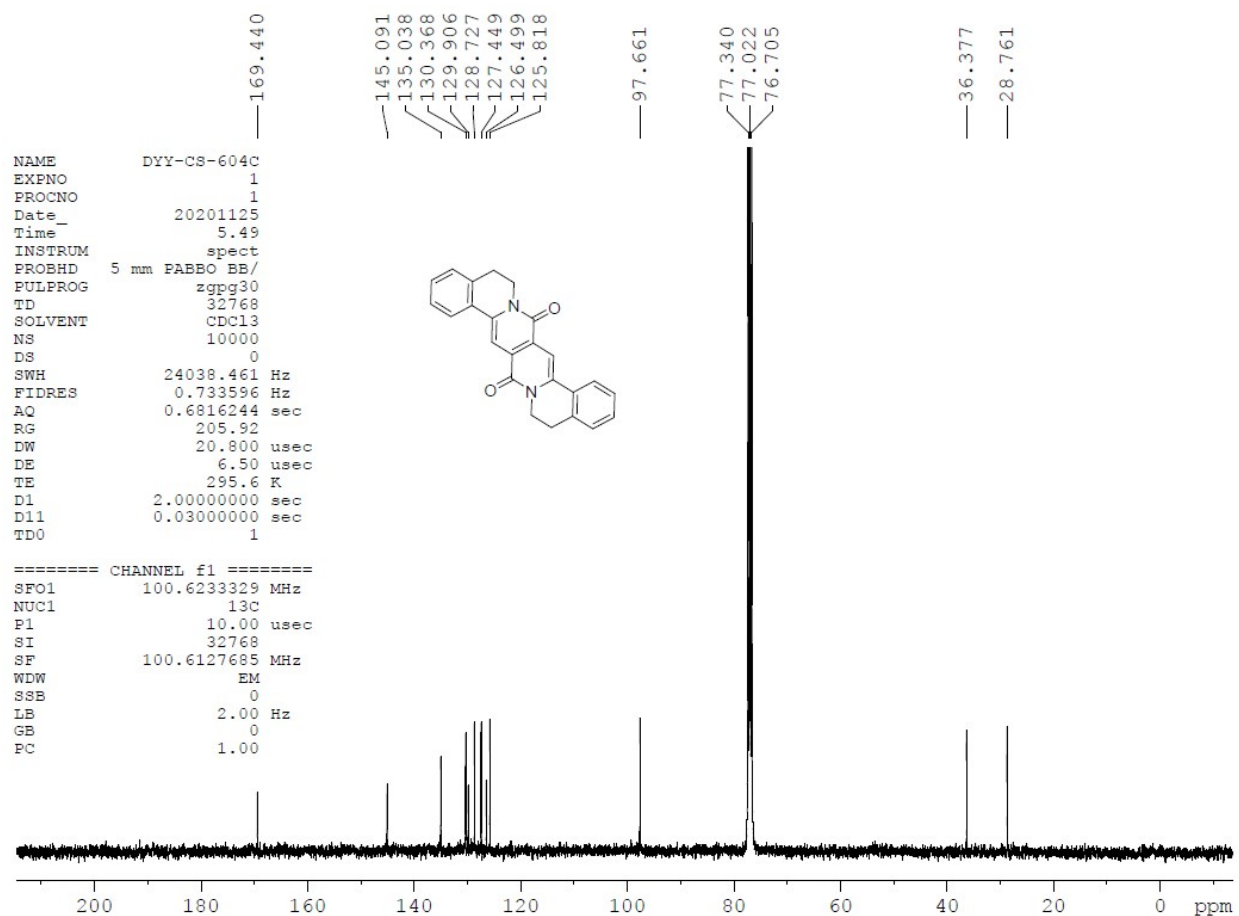

<sup>1</sup>H NMR of compound **19b** (CDCl<sub>3</sub>)

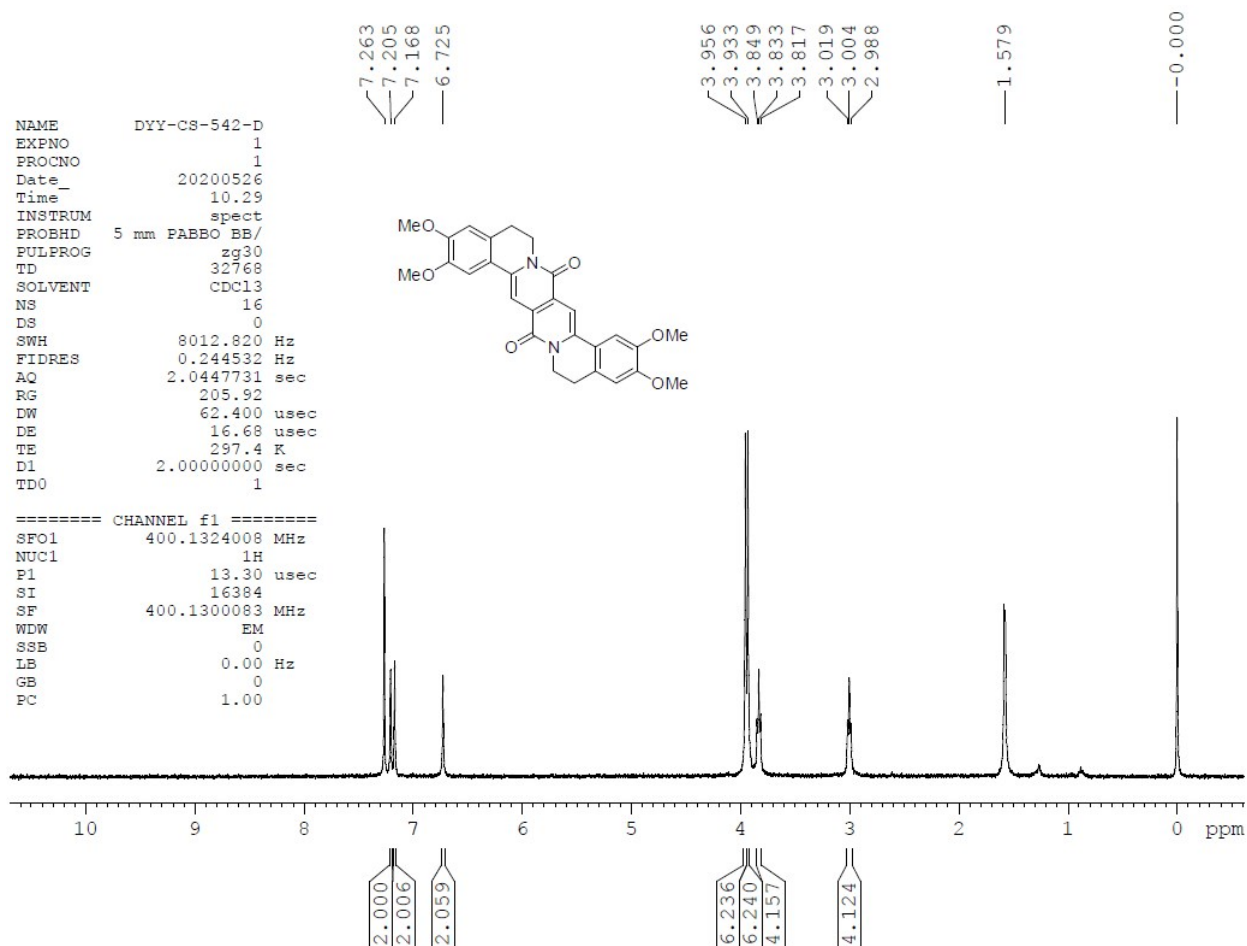

<sup>13</sup>C NMR of compound **19b** (CDCl<sub>3</sub>)

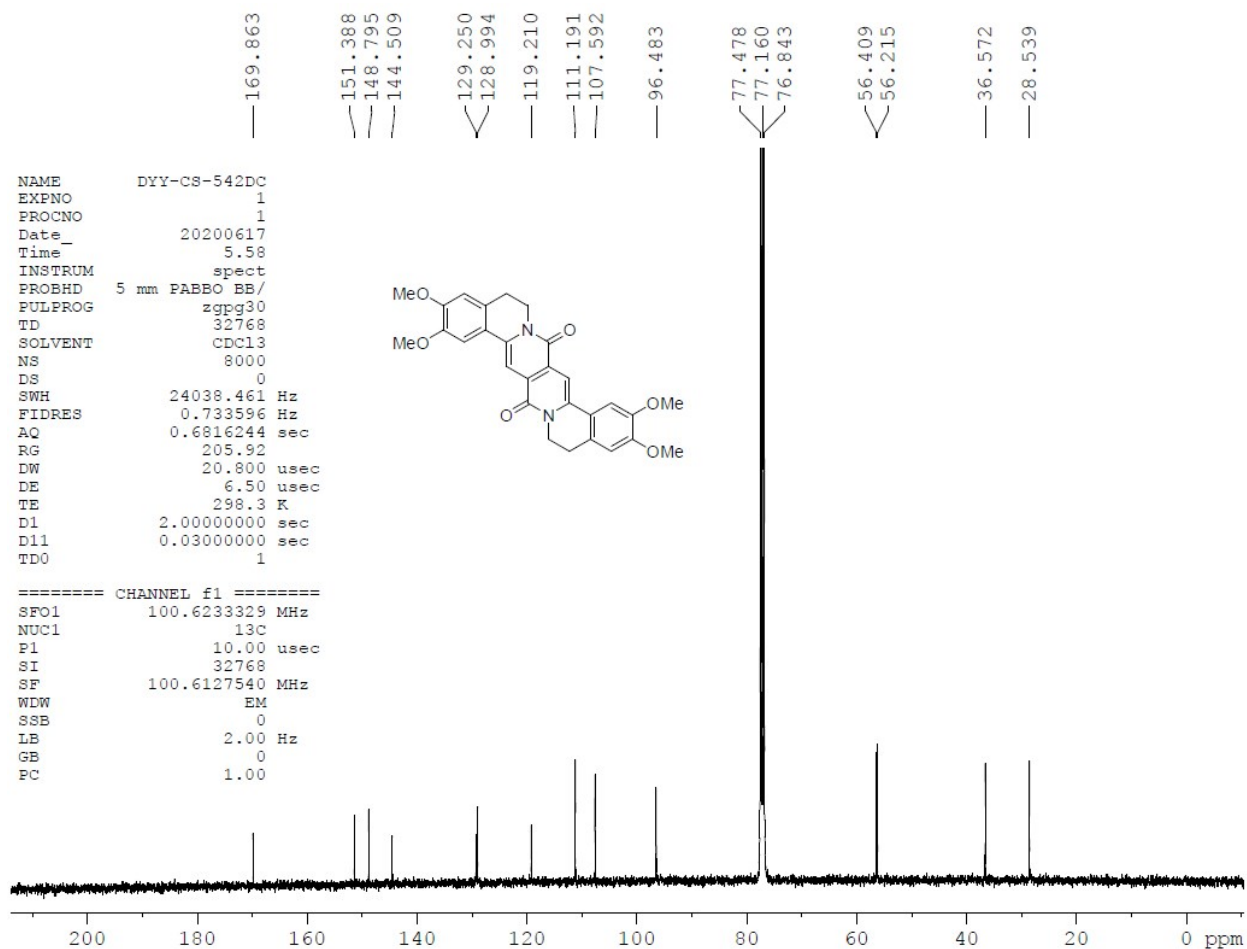

Supplement: d0ob02376k1.pdf [file d0ob02376k1.pdf]
